# Supplementary material for: Lost in Trans-Nation: Unearthing Chicano Identity in Daniel Venegas’s Las Aventuras de Don Chipote o Cuando Los Pericos Mamen
Source: Royal Society of Chemistry journal article supplement (doi:10.1039/b816850d), 2013-04-19

## Supplementary Information for

# Selective Dimerization of 1,6-Diynes Catalyzed by Ionic Liquid-Supported Nickel Complexes in An Ionic Liquid/Toluene Biphasic System

Avijit Goswami,<sup>a</sup> Taichi Ito,<sup>a</sup> Naoko Saino,<sup>b</sup> Kouki Kase,<sup>a</sup> Chikashi Matsuno<sup>a</sup> and Sentaro Okamoto<sup>\*a</sup>  
<sup>a</sup>Department of Material & Life Chemistry, Kanagawa University, 3-27-1 Rokkakubashi, Kanagawaku, Yokohama 221-8686. <sup>b</sup>New Products Development Division, Kanto Denka Kogyo Co., Ltd., 425 Kanai, Shibukawa, Gunma 377-0027, Japan

okamos10@kanagawa-u.ac.jp

### Contents

|                                                |                 |
|------------------------------------------------|-----------------|
| Experimental & Characterization                | Page 1 ~ Page 6 |
| <sup>1</sup> H and <sup>13</sup> C NMR spectra | Page 7 ~        |

## Experimental Section

**General:** NMR spectra were recorded in CDCl<sub>3</sub> at 600, 500, 270 and 90 MHz for <sup>1</sup>H and 150, 125, 67.5 and 22.5 MHz for <sup>13</sup>C on JEOL JNM-ECA600, -ECA500, -EX270 and HITACHI R-1900 spectrometers, respectively. Chemical shifts are reported in parts per million (ppm, δ) relative to Me<sub>4</sub>Si (δ 0.00) or residual CHCl<sub>3</sub> (δ 7.26 for <sup>1</sup>H NMR) and CDCl<sub>3</sub> (δ 77.0 for <sup>13</sup>C NMR). IR spectra were recorded on JASCO IR FT/IR 4100 spectrometer. UV-vis. absorption and fluorescence spectra were measured on SHIMADZU UV-2450 and RF-5300PC spectrometers, respectively. High-resolution mass spectra (HR-MS) were measured on JEOL Accu TOF T-100 equipped with ESI ionization. The *M<sub>n</sub>* and *M<sub>w</sub>/M<sub>n</sub>* of polymers were measured with a TOSOH HLC-8020 gel-permeation chromatography (GPC) unit (eluent: THF; calibration: polystyrene standards) using two TSK-gel columns (2 x Multipore H<sub>XL</sub>-M). MALDI-TOF mass spectra were recorded on a SHIMADZU Biotech Axima CFRplus curved field reflection (CFR) in the reflection ion mode by use of a laser (λ = 337 nm).

All reactions sensitive to oxygen and/or moisture were performed under an argon atmosphere. Dry solvents [tetrahydrofuran (THF), *N,N*-dimethylformamide (DMF), dichloromethane (CH<sub>2</sub>Cl<sub>2</sub>), toluene and diethyl ether (ether)] were purchased from Kanto Chemicals. (DME)NiBr<sub>2</sub> (DME = 1,2-dimethoxyethane) and 3-butyl-1-methyl-1*H*-imidazol-3-ium hexafluorophosphate (BMI) were purchased from Aldrich. 2-(2,6-Diisopropylphenyliminomethyl)pyridine (DIPIMP) was prepared from pyridine 2-carboxaldehyde and 2,6-diisopropylaniline by the reported procedure.<sup>1</sup> All of the other commercially chemicals were used as received, unless otherwise indicated.

### **Procedure for Synthesizing Annulated Cyclooctatetraene **2a** and Polymeric Material(s) from 1,6-Diyne **1a** in THF (Mono-phasic Reaction: Table 1, Entry 1).**

To a stirred mixture of Zn powder (6.5 mg, 0.10 mmol) and diyne **1a** (236 mg, 1.0 mmol) in THF (2 mL) was added a solution of NiCl<sub>2</sub>·6H<sub>2</sub>O (6 mg, 0.05 mmol) and DIPIMP (8 mg, 0.06 mmol) in THF (2 mL) at room temperature. The reaction progress was checked by TLC analysis. After complete consumption of diyne **1a**, 2 mL of Et<sub>2</sub>O was added and the mixture was passed through a pad of Celite with ether. The filtrate was concentrated to dryness and the resulting colored residue was chromatographed on silica gel using hexane/EtOAc (3:1) to give a mixture of COT **2a** and dimer **3a** and trimer **4a**. Pure **2a** (40 mg) was obtained after the resulting yellow solids of a mixture of **2a** and **3a** was washed with hexane /EtOAc (5:1) to remove the residual dimer **3a**. More polar materials (polymeric compounds) were obtained by further eluting of the column using EtOAc (*vide infra*).

### Typical Procedure for the Preparation of 1-Methoxyethoxyethyl-3-butyl-1*H*-imidazol-3-ium Bromide (MEEBI) and 1-Methoxyethoxyethyl-3-methyl-1*H*-imidazol-3-ium Bromide (MEEMI).

A mixture of *N*-alkyl imidazole (10 mmol) and 1-bromo-2-(2-methoxyethoxy)ethane (10 mmol) was heated at 80 °C for overnight. The brown crude reaction mixture was cooled and washed several times with diethyl ether and hexane.

**1-Methoxyethoxyethyl-3-butyl-1*H*-imidazol-3-ium Bromide (MEEBI):** <sup>1</sup>H NMR (CDCl<sub>3</sub>, 600 MHz) δ 10.38 (br s, 1H, NCHN), 7.67 and 7.37 (2 br s, each 1H, HC=CH), 4.67 (t, *J* = 4.8 Hz, 2H, NCH<sub>2</sub>CH<sub>2</sub>O), 4.32 (t, *J* = 7.2 Hz, 2H, NCH<sub>2</sub>CH<sub>2</sub>CH<sub>2</sub>), 3.92 (t, *J* = 4.8 Hz, 2H, NCH<sub>2</sub>CH<sub>3</sub>O), 3.67 (t, *J* = 4.8 Hz, 2H, OCH<sub>2</sub>CH<sub>2</sub>OMe), 3.53 (t, *J* = 4.8 Hz, 2H, OCH<sub>2</sub>CH<sub>2</sub>OMe), 3.37 (s, 3H, OCH<sub>3</sub>), 1.92 (t, *J* = 7.2 Hz, 2H, NCH<sub>2</sub>CH<sub>2</sub>CH<sub>2</sub>), 1.40 (q, *J* = 7.2 Hz, 2H, CH<sub>2</sub>CH<sub>3</sub>), 0.98 (t, *J* = 7.2 Hz, 3H, CH<sub>2</sub>CH<sub>3</sub>); <sup>13</sup>C NMR (CDCl<sub>3</sub>, 150 MHz) δ 136.2, 123.0, 121.5, 71.2, 69.8, 68.5, 58.5, 49.4, 49.2, 31.7, 19.0, 13.0; IR (Neat) 2933, 2874, 1638, 1563, 1459, 1383, 1165, 1097, 848 cm<sup>-1</sup>. HR-MS: *m/z* = calcd For (C<sub>12</sub>H<sub>23</sub>N<sub>2</sub>O<sub>2</sub>)<sup>+</sup> : 227.1760; found 227.1748.

**1-Methoxyethoxyethyl-3-methyl-1*H*-imidazol-3-ium Bromide (MEEMI):** <sup>1</sup>H NMR (CDCl<sub>3</sub>, 600 MHz) δ 10.38 (br s, 1H, NCHN), 7.60 and 7.32 (2 br s, each 1H, HC=CH), 4.63 (t, *J* = 4.8 Hz, 2H, NCH<sub>2</sub>), 4.08 (s, 3H, NCH<sub>3</sub>), 3.91 (t, *J* = 4.8 Hz, 2H, NCH<sub>2</sub>CH<sub>2</sub>), 3.67 (t, *J* = 4.8 Hz, 2H, OCH<sub>2</sub>CH<sub>2</sub>OMe), 3.54 (t, *J* = 4.8 Hz, 2H, OCH<sub>2</sub>CH<sub>2</sub>OMe), 3.37 (s, 3H, CH<sub>2</sub>OCH<sub>3</sub>); <sup>13</sup>C NMR (CDCl<sub>3</sub>, 150 MHz) δ 137.0, 123.1, 122.9, 71.3, 70.1, 68.7, 58.7, 49.4, 36.5; IR (Neat) 2931, 1638, 1572, 1451, 1353, 1170, 1096, 750 cm<sup>-1</sup>. HR-MS: *m/z* = calcd For (C<sub>9</sub>H<sub>17</sub>N<sub>2</sub>O<sub>2</sub>)<sup>+</sup> 185.1290, found 185.1282.

### Typical Procedure for Cyclodimerization of 1,6-Diynes **1** to Annulated Cyclooctatetraenes **2**.

To a mixture of Zn powder (6.5 mg, 0.10 mmol), NiBr<sub>2</sub>·3H<sub>2</sub>O (13.6 mg, 0.05 mmol) and MEEBI (18.4 mg, 0.06 mmol) was added a solution of diyne **1** (1.0 mmol) in toluene (4 mL). 0.2 ml of 3-butyl-1-methyl-1*H*-imidazol-3-ium hexafluorophosphate (BMI) was added in a portion. The resulting heterogeneous reaction mixture was placed into a 60 °C oil bath. The mixture slowly turned from colorless to deep red over the course of 5 min. After complete consumption of the starting diyne, the reaction mixture was allowed to cool to ambient temperature. The supernatant was decanted and filtered through a pad of Celite with ether. The solvents were removed under reduced pressure and the residue was chromatographed on silica gel to give the corresponding annulated cyclooctatetraene **2**.

**Compound 2a:** M.p. 136-137 °C; <sup>1</sup>H NMR (CDCl<sub>3</sub>, 600 MHz) δ 5.58 (s, 4H, olefinic protons), 4.20 (q, *J* = 7.2 Hz, 8H, OCH<sub>2</sub>CH<sub>3</sub>), 2.93 (s, 8H, CCH<sub>2</sub>), 1.25 (t, *J* = 7.2 Hz, 12H, OCH<sub>2</sub>CH<sub>3</sub>); <sup>13</sup>C

NMR (CDCl<sub>3</sub>, 150 MHz)  $\delta$  171.7, 137.0, 130.2, 61.6, 58.7, 44.6, 14.0; IR (KBr) 2980, 2832, 2848, 1726, 1262, 1186, 1074, 859 cm<sup>-1</sup>. HR-MS:  $m/z$ = calcd For C<sub>26</sub>H<sub>32</sub>O<sub>8</sub>Na [M+Na]: 495.1995, found 495.1955.

**Compound 2b:** <sup>1</sup>H NMR (CDCl<sub>3</sub>, 600 MHz)  $\delta$  5.59 (s, 4H, olefinic protons), 3.75 (s, 12H, OCH<sub>3</sub>), 2.94 (s, 8H, CH<sub>2</sub>); <sup>13</sup>C NMR (CDCl<sub>3</sub>, 150 MHz)  $\delta$  ; 172.2, 136.9, 130.1, 58.5, 52.9, 44.6; IR (KBr) 3001, 2954, 2845, 1735, 1435, 1258, 1199, 1168, 1053, 867 cm<sup>-1</sup>. These spectroscopic data and crystallographic data were identical to those reported.<sup>2</sup> HR-MS:  $m/z$ = calcd For C<sub>22</sub>H<sub>24</sub>O<sub>8</sub>Na [M+Na]: 439.1369, found 439.1338.

**Compound 2c:** <sup>1</sup>H NMR (CDCl<sub>3</sub>, 600 MHz)  $\delta$  5.54 (s, 4H, olefinic protons), 5.00 (heptet,  $J$  = 6.0 Hz, 4H, OCHCH<sub>3</sub>), 2.85 (s, 8H, CH<sub>2</sub>) 1.98 (d,  $J$  = 6.0 Hz, 24H, CHCH<sub>3</sub>); <sup>13</sup>C NMR (CDCl<sub>3</sub>, 150 MHz)  $\delta$  ; 171.1, 136.9, 130.1, 68.8, 58.7, 44.4, 21.4; IR (Neat) 2980, 2934, 1726, 1454, 1266, 1102 cm<sup>-1</sup>. HR-MS:  $m/z$ = calcd For C<sub>30</sub>H<sub>40</sub>O<sub>8</sub>Na [M+Na]: 551.2621, found 551.2588.

**Compound 2d:** <sup>1</sup>H NMR (CDCl<sub>3</sub>, 600 MHz)  $\delta$  5.62 (s, 4H, olefinic protons), 2.82 (s, 8H, CH<sub>2</sub>), 2.15 (s, 12H, CH<sub>3</sub>); <sup>13</sup>C NMR (CDCl<sub>3</sub>, 150 MHz)  $\delta$  ; 204.7, 137.2, 130.2, 72.5, 41.6, 26.3; IR (Neat) 3004, 2917, 2853, 1715, 1694, 1423, 1356, 1216, 774 cm<sup>-1</sup>. HR-MS:  $m/z$ = calcd For C<sub>22</sub>H<sub>24</sub>O<sub>4</sub>Na [M+Na]: 375.1572, found 375.1555.

**Compound 2e:** M.p. 246-247 °C; <sup>1</sup>H NMR (CDCl<sub>3</sub>, 600 MHz)  $\delta$  7.71 (d,  $J$  = 8.4 Hz, 4H, Ar), 7.35 (d,  $J$  = 8.4 Hz, 4H, Ar), 5.51 (s, 4H, olefinic protons), 3.92 (s, 8H, CH<sub>2</sub>), 2.47 (s, 6H, CH<sub>3</sub>); <sup>13</sup>C NMR (CDCl<sub>3</sub>, 150 MHz)  $\delta$  143.9, 134.9, 134.0, 129.9, 128.9, 127.5, 57.48, 21.63; IR (Neat) 2953, 2922, 2827, 1597, 1348, 1164, 1108, 671, 575 cm<sup>-1</sup>. These spectroscopic data and crystallographic data were identical to those reported.<sup>2</sup> HR-MS:  $m/z$ = calcd For C<sub>26</sub>H<sub>26</sub>N<sub>2</sub>O<sub>4</sub>S<sub>2</sub>Na [M+Na]: 517.1231, found 517.1218.

**Compound 2f:** <sup>1</sup>H NMR (CDCl<sub>3</sub>, 600 MHz)  $\delta$  5.78 (s, 4H, olefinic protones), 3.69 (s, 8H, OCH<sub>2</sub>), 2.19 (s, 8H, CCH<sub>2</sub>C) 1.42 (s, 12H, CH<sub>3</sub>); <sup>13</sup>C NMR (CDCl<sub>3</sub>, 150 MHz)  $\delta$  ; 138.0, 130.5, 97.7, 69.1, 44.5, 40.4, 23.8; IR (Neat) 2988, 2939, 2904, 2859, 1447, 1381, 1200, 1156, cm<sup>-1</sup>. HR-MS:  $m/z$ = calcd For C<sub>24</sub>H<sub>32</sub>O<sub>4</sub>Na [M+Na]: 407.2198, found 407.2182.

### Isolation and Characterization of Polymeric Materials Derived from Diyne **1a** by the Reaction with a DIPIMP/NiCl<sub>2</sub>-6H<sub>2</sub>O/Zn Catalyst.

Polar colored fractions were obtained by column chromatography of the residue, obtained by the reaction of **1a** (236 mg, 1.0 mmol) with Zn powder (6.5 mg, 0.10 mmol), NiCl<sub>2</sub>-6H<sub>2</sub>O (12 mg, 0.05 mmol) and DIPIMP (16 mg, 0.06 mmol) in THF (4 ml), on silica gel with hexane/EtOAc (1/1 to

0/1). A less polar yellow solid (61.5 mg, 26%) and a more polar orange solid (66.9 mg, 28%) were separated. The resulting yellow and orange solid materials were subjected to  $^1\text{H}$  NMR, IR, UV-vis absorption, GPC and TOF-MS analyses.

From GPC (THF) analyses [Figure 1, (d) and (e)],  $M_w$  of these fractions were calculated to be  $1.2 \times 10^3$  and  $5.1 \times 10^3$  for yellow- and deep orange-materials, respectively. The polar material had higher molecular weight and it was assumed that the color-change might have originated from the difference in the length of the conjugated segment. TOF-MS spectra [Figure 1, (c)] of the yellow-colored fraction indicated that the material was a mixture of oligomeric molecules comprising a unit of  $m/z$  236, which is identical to the molecular weight of **1a** (Exact Mass: 236.104). In addition, each major peak could be calculated as the formula  $[2\text{H} + n\mathbf{1a} + \text{Na}^+]$ , which indicates a linear polymeric structure and not a cyclic one. Figure 1 (a) shows the UV-vis spectra of these fractions in  $\text{CH}_2\text{Cl}_2$  with a smooth absorption profile extended to 500 nm. The more polar material exhibited stronger absorption for a wider wavelength range, probably due to its higher conjugation.  $^1\text{H}$  NMR spectra of these fractions in  $\text{CDCl}_3$  [Figure 2 (b)] shows olefinic protons in the range  $\delta = 6.8\text{--}7.2$  ppm, which are characteristically shifted downfield due to their highly conjugated segment.

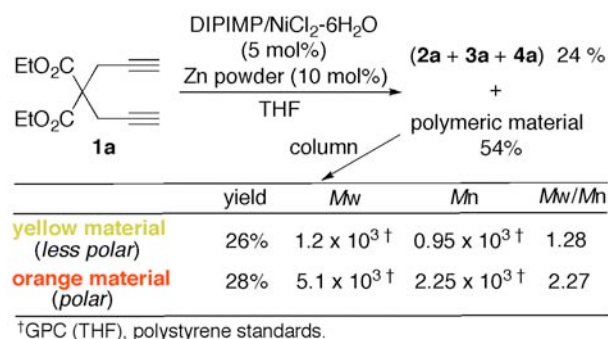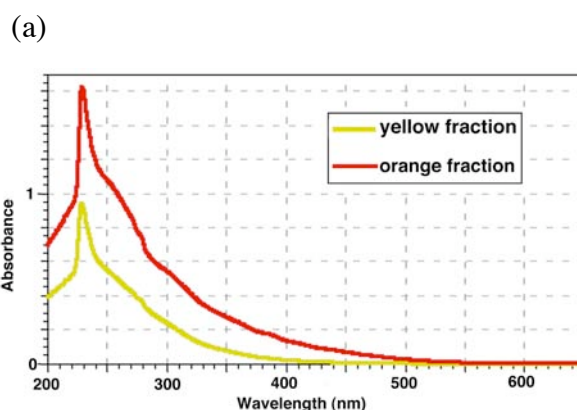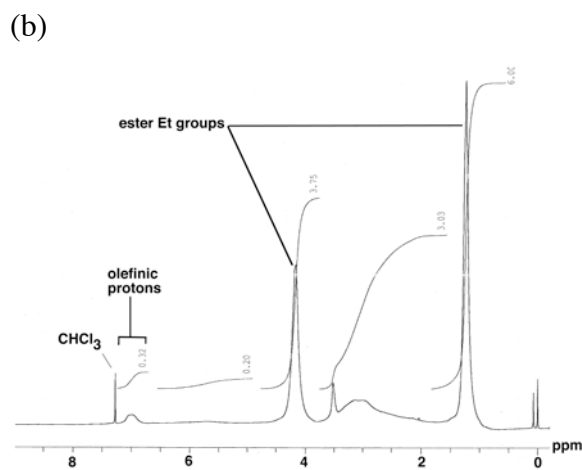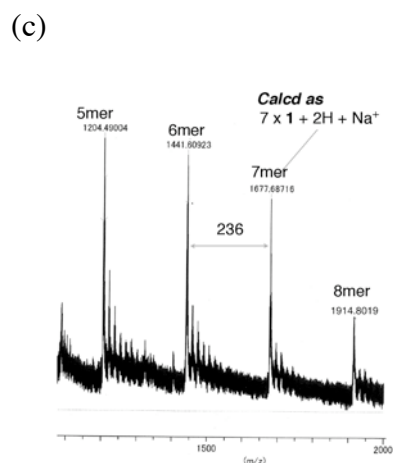

(d)

(e)

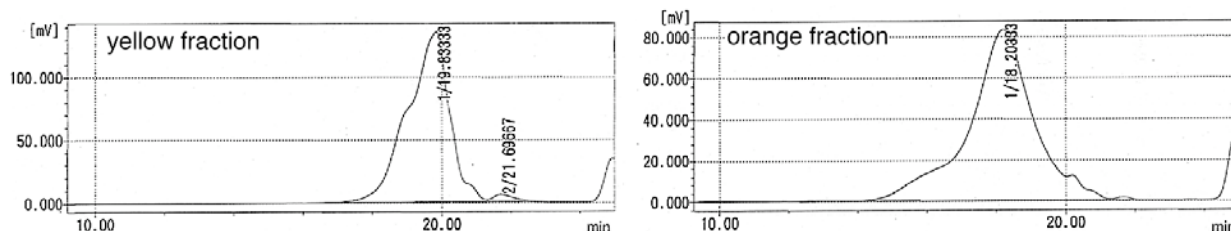

**Figure 1.** Spectral Data of Polymeric Product. (a) UV-vis absorption spectra / CH<sub>2</sub>Cl<sub>2</sub> solution (1.0 mg/L). Yellow line: less polar part, orange line: polar part, brown line: most polar part. (b) 270 MHz <sup>1</sup>H NMR spectra of orange-colored material (CDCl<sub>3</sub>). (c) Accu TOF-MS spectra with ESI. (d) GPC chart for yellow fraction. (e) GPC chart for orange fraction.

Based on these results, it may be postulated that the colored material might have a polymeric structure of **6a** [Figure 3]. However, since IR spectra of these colored materials showed small peaks corresponding to an alkyne moiety, this suggests that alkyne residues unreacted in the reaction were partially incorporated at the internal positions such as **7a** and/or at the terminal position(s) such as the polymer **6a** having a **T**<sup>2</sup>-structure. Alternatively, the corresponding isomeric structures **6a'** and **7a'** can not be ruled out.

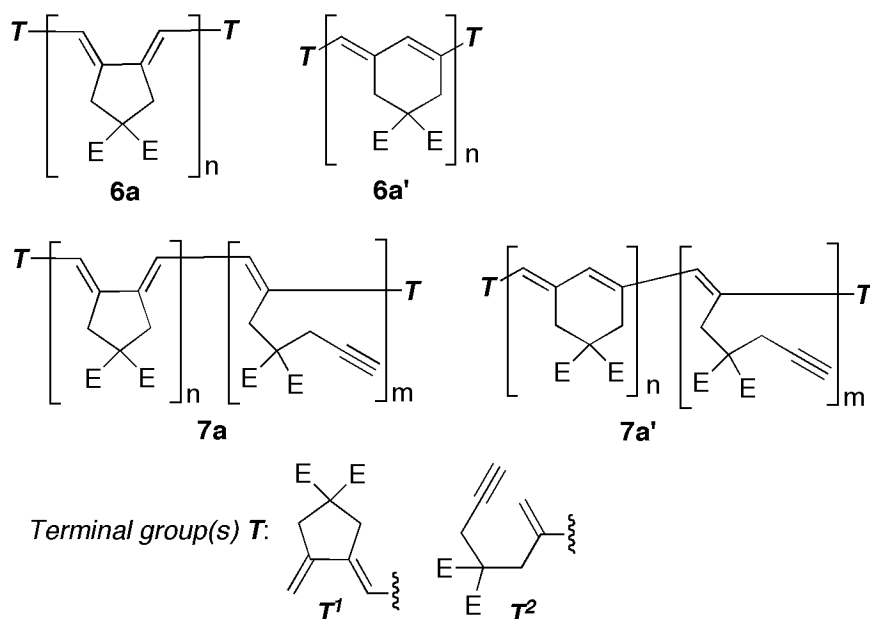

**Figure 2.** Proposed Polymer Structure. (E = CO<sub>2</sub>Et)

## References

- (1) Cámpora, J.; del Mar Conejo, M.; Mereiter, K.; Palma, P.; Pérez, C.; Reyes, M. L.; Ruiz, C. *J. Organomet. Chem.* **2003**, *683*, 220. Saino, N.; Kogure, D.; Kase, K.; Okamoto, S. *J. Organomet. Chem.* **2006**, *691*, 3129.

(2) Wender, P. A.; Christy, J. P. *J. Am. Chem. Soc.* **2007**, *129*, 13402.

MEEBI Br<sup>+</sup>

C:\DOCUME~1\NMR\LOCALS~1\Temp\~FTP7476.1

Ag-473

C:\DOCUME~1\NMR\LOCALS~1\

Ag-473

24-01-2008 19:56:43

1H

single pulse.ex2

600.17 MHz

5.30 KHZ

5.47 Hz

16384

11261.26 Hz

16

1.4549 sec

5.0000 sec

6.10 usec

22.4 C

0.00 ppm

0.12 HZ

44

DFILE  
COMNT  
DATIM  
OBNUC  
EXMOD  
OBFRQ  
OBSET  
OBFIN  
POINT  
FREQU  
SCANS  
ACQTM  
PD  
PW1  
IRNUC  
CTEMP  
SLVNT  
EXREF  
BF  
RGAIN

1H

CDCL3

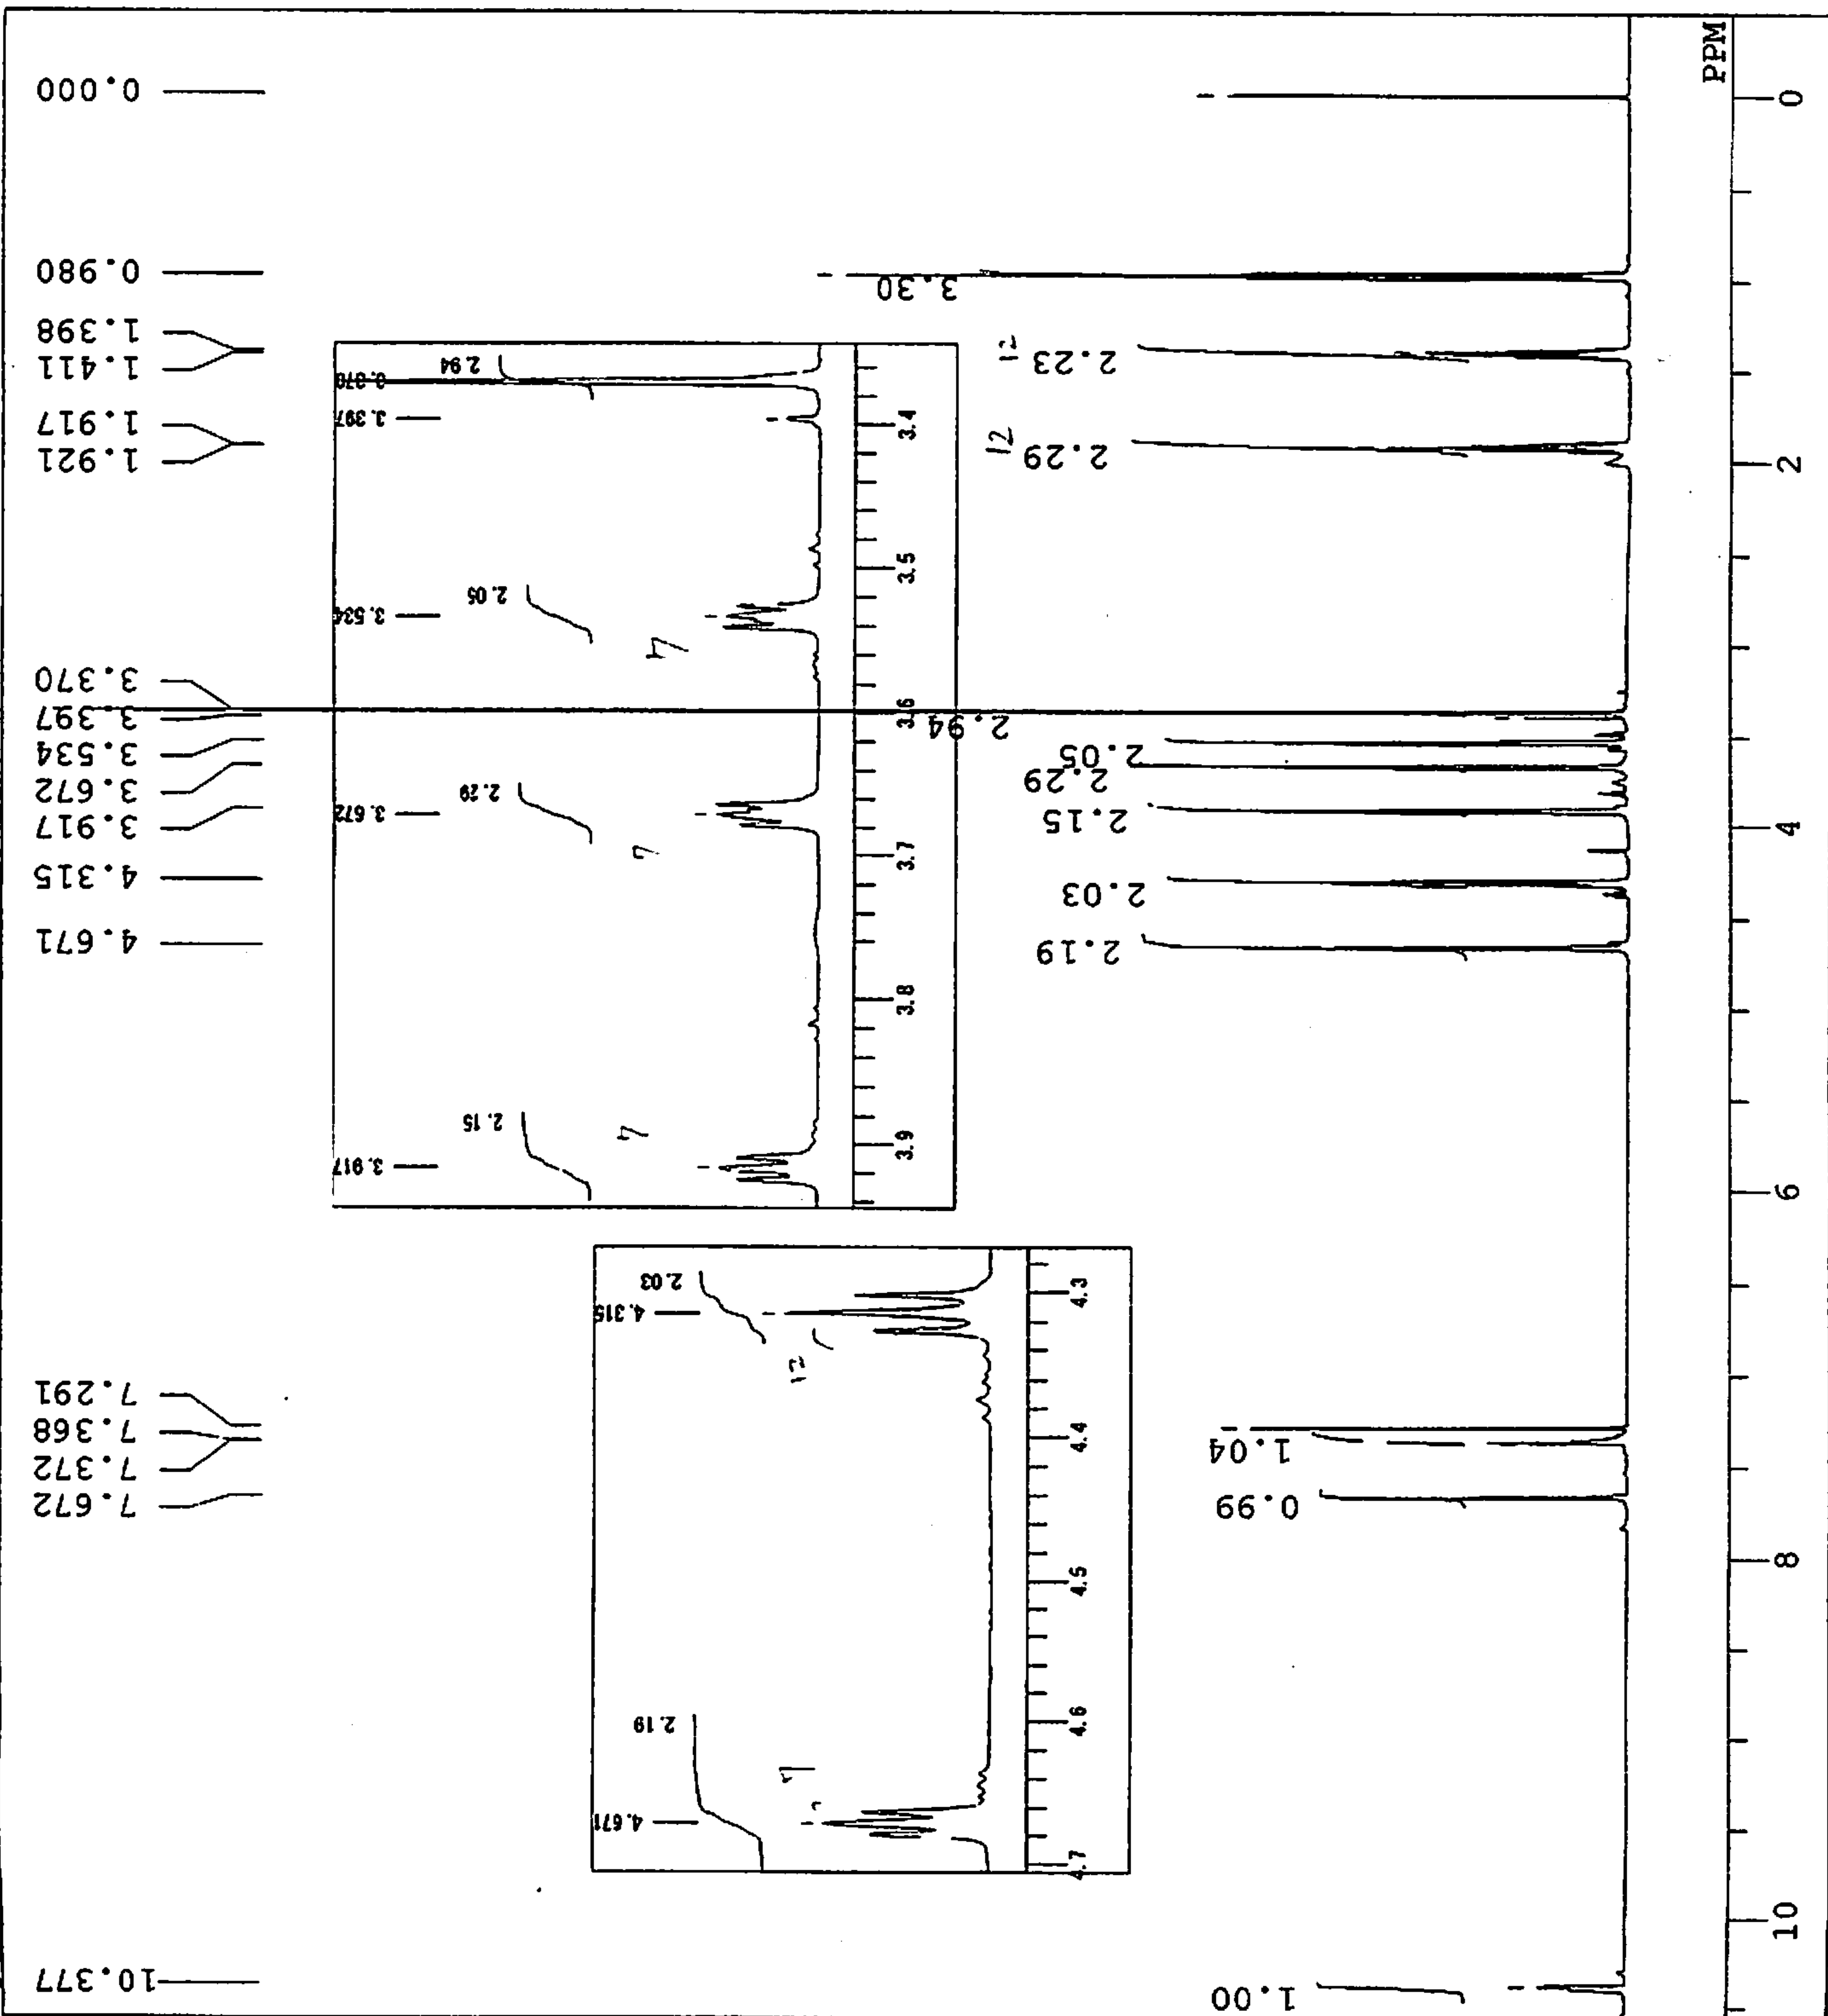



MEEBI Br<sup>+</sup>

F:\COT\Ito-Imidazo-Bu-C.als  
Ito-Imidazo-Bu-C

DFILE F:\COT\Ito-Imidazo-Bu-  
 COMNT Ito-Imidazo-Bu-C  
 DATIM 11-04-2008 17:42:12  
 OBNUC 13C  
 EXMOD single\_pulse\_dec  
 OBFRQ 150.92 MHz  
 OBSET 8.52 KHz  
 OBFIN 1.74 Hz  
 POINT 26214  
 FREQU 37878.21 Hz  
 SCANS 141  
 ACQTM 0.6921 sec  
 PD 2.0000 sec  
 PW1 4.00 usec  
 IRNUC 1H  
 CTEMP 24.0 C  
 SLVNT CDCL3  
 EXREF 77.00 ppm  
 BF 4.20 Hz  
 RGAIN 50

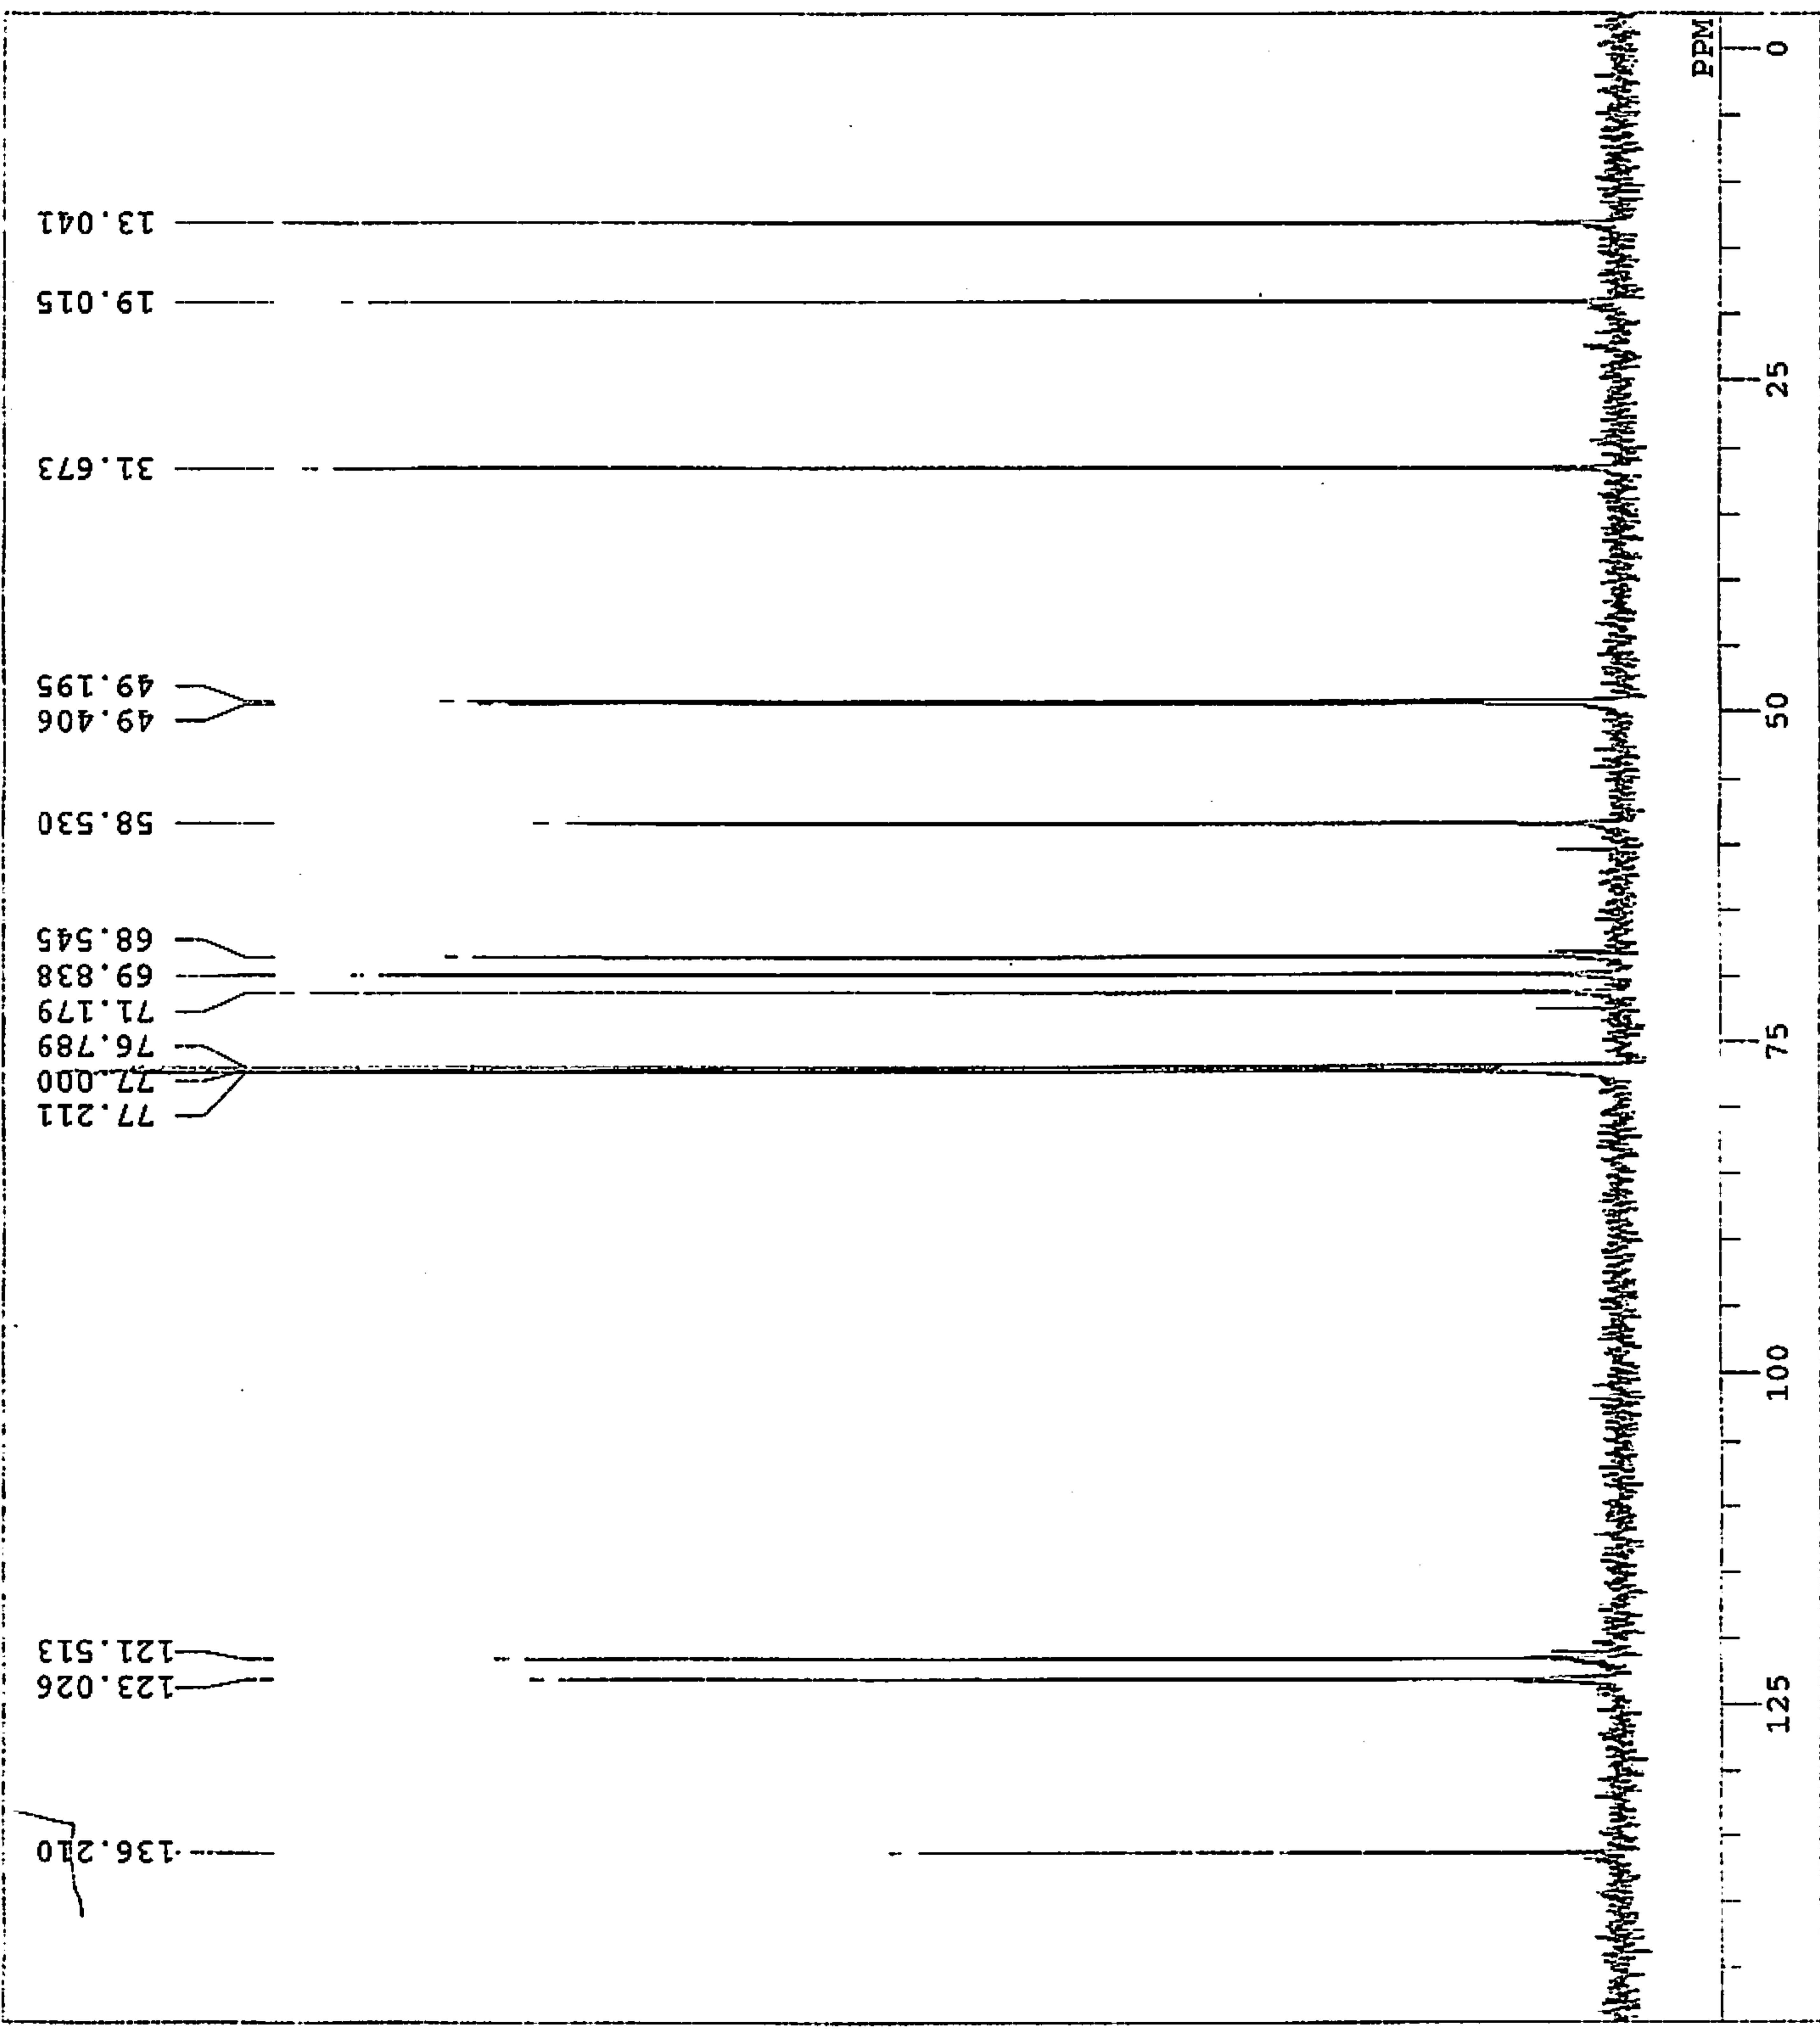

# MEEMI Br<sup>+</sup>

F:\Ito-imidazo-Me-H-.1  
Ito-imidazo-Me-H-

DFILE F:\Ito-imidazo-Me-H-.1  
COMNT Ito-imidazo-Me-H-  
DATIM 11-04-2008 23:00:50  
OBNUC 1H  
EXMOD single\_pulse.ex2  
OBFREQ 600.17 MHz  
OBSET 5.30 KHz  
OBFIN 5.47 Hz  
POINT 16384  
FREQU 11261.26 Hz  
SCANS 16  
ACQTM 1.4549 sec  
PD 5.0000 sec  
PW1 6.00 usec  
IRNUC 1H  
CTEMP 23.8 c  
SLVNT CDCL3  
EXREF 0.00 ppm  
BF 0.10 Hz  
RGAIN 50

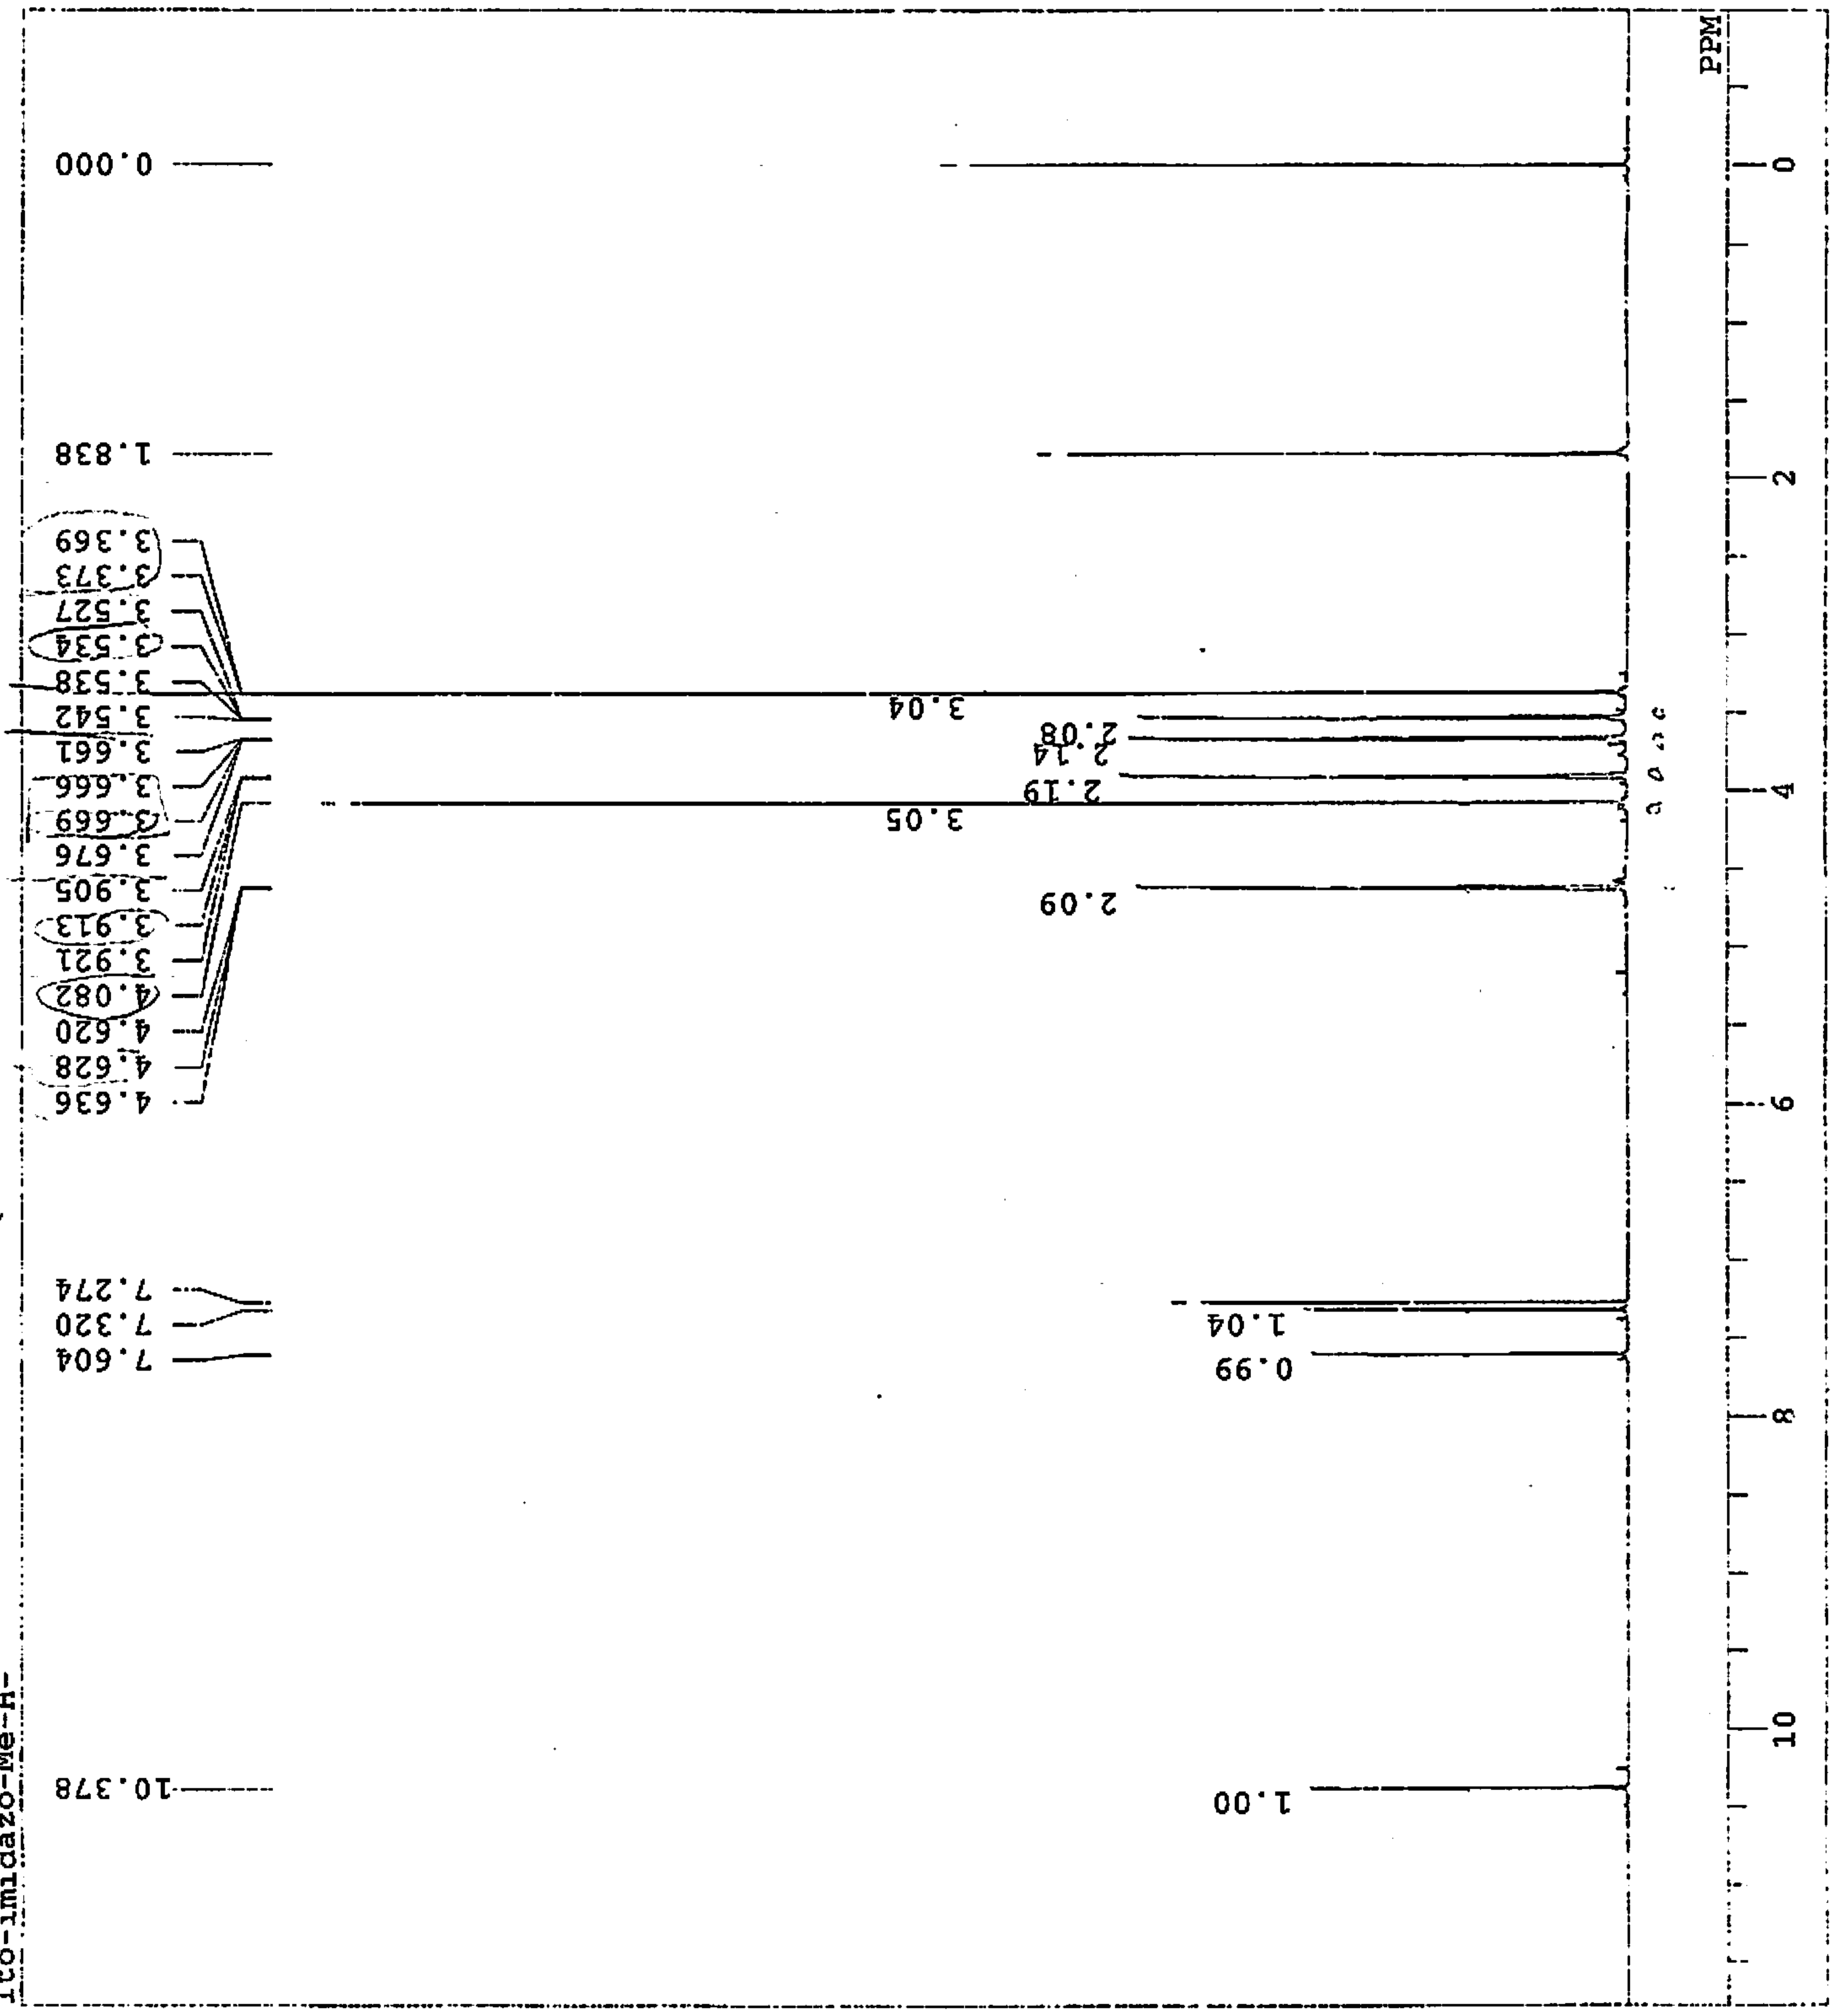

# MEEMI Br<sup>+</sup>

E:\Ito-Imidazo-Me-C.1  
Ito-Imidazo-Me-C

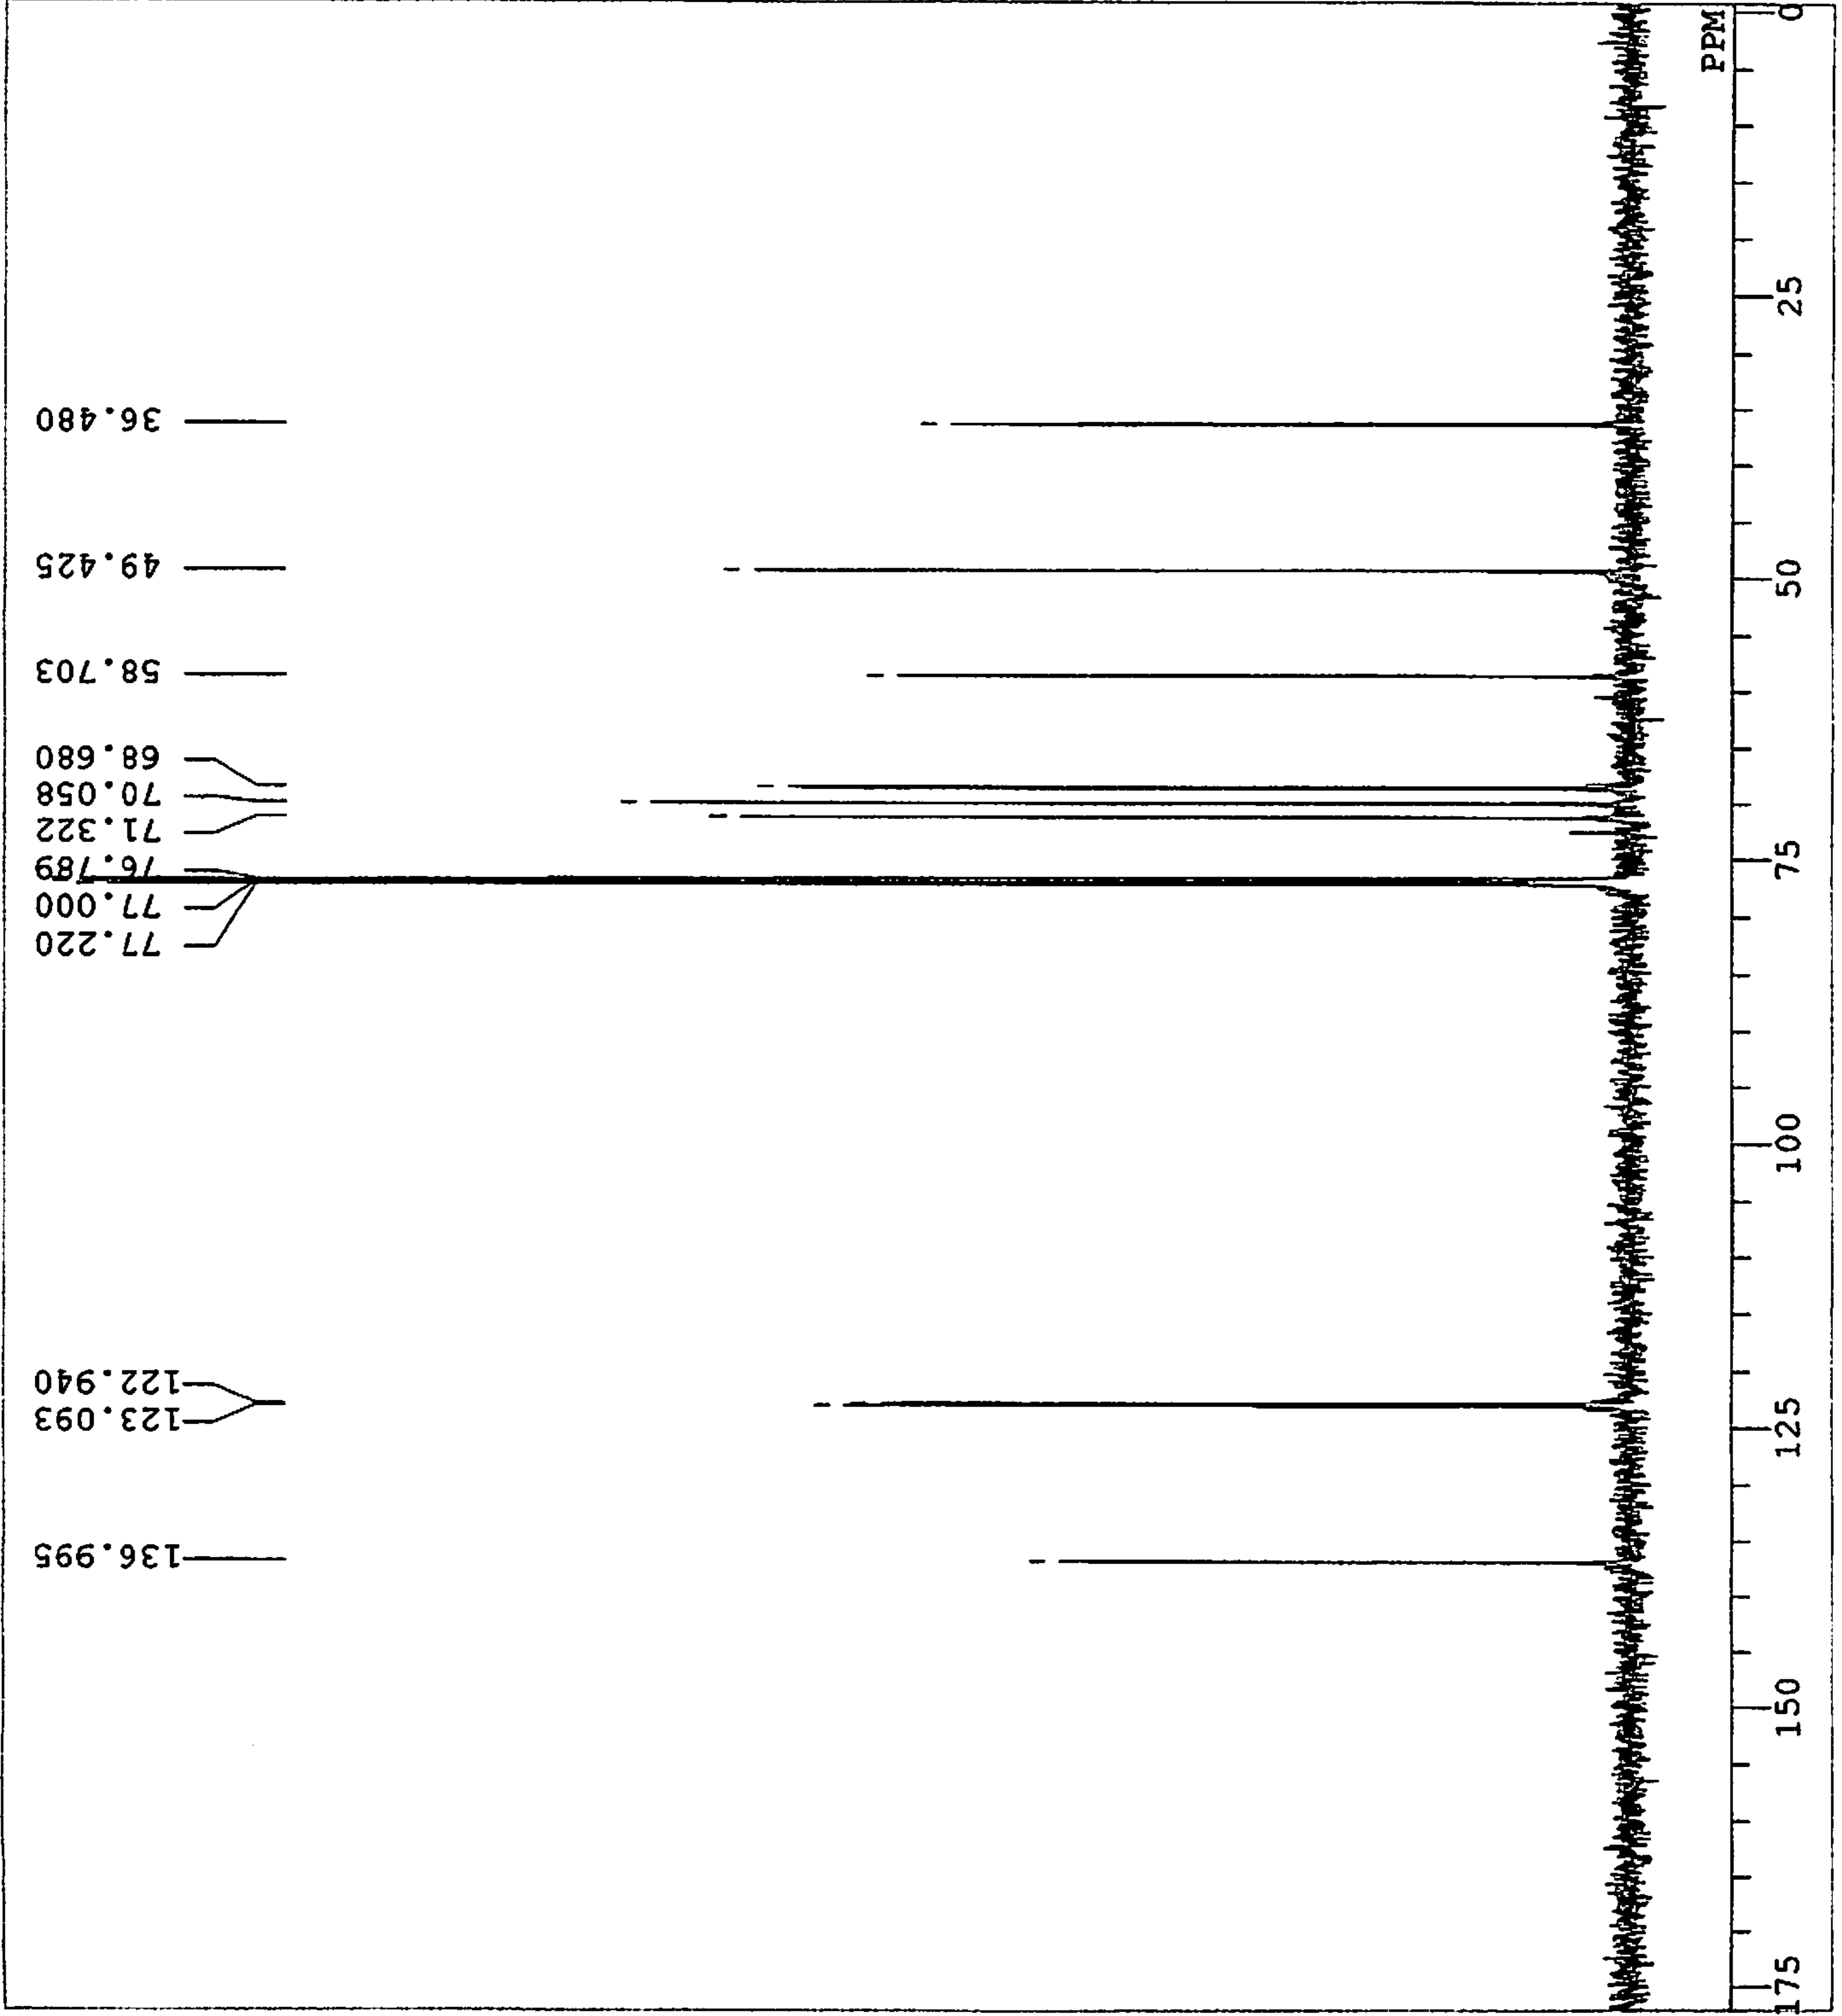

DFILE E:\Ito-Imidazo-Me-C.1  
COMNT Ito-Imidazo-Me-C  
DATIM 11-04-2008 17:28:36  
OBNUC 13C  
EXMOD single\_pulse\_dec  
OBFRQ 150.92 MHz  
OBSET 8.52 KHz  
OBFIN 1.74 Hz  
POINT 32768  
FREQU 47348.49 Hz  
SCANS 106  
ACQTM 0.6921 sec  
PD 2.0000 sec  
PW1 4.00 usec  
IRNUC 1H  
CTEMP 23.9 C  
SLVNT CDCL3  
EXREF 77.00 ppm  
BF 4.20 Hz  
RGAIN 50

# Compound 2a

E:\COT final\COT-ethyl malonate\Ag-COT-ethyl malonate.1  
Ag-COT-ethyl malonate

DFILE  
COMNT  
DATIM  
OBNUC  
EXMOD  
OBFREQ  
OBSETH  
OBFIN  
POINT  
FREQU  
SCANS  
ACQTM  
PD  
PW1  
IRNUC  
CTEMP  
SLVNT  
EXREF  
BF  
RGAIN

E:\COT final\COT-ethyl ma  
Ag-COT-ethyl malonate  
11-03-2008 17:56:52  
1H  
single\_pulse.ex2  
600.17 MHz  
5.30 KHz  
5.47 Hz  
16384  
11261.26 Hz  
16  
1.4549 sec  
5.0000 sec  
6.10 usec  
1H  
23.5 C  
CDCL3  
0.00 ppm  
0.12 Hz  
44

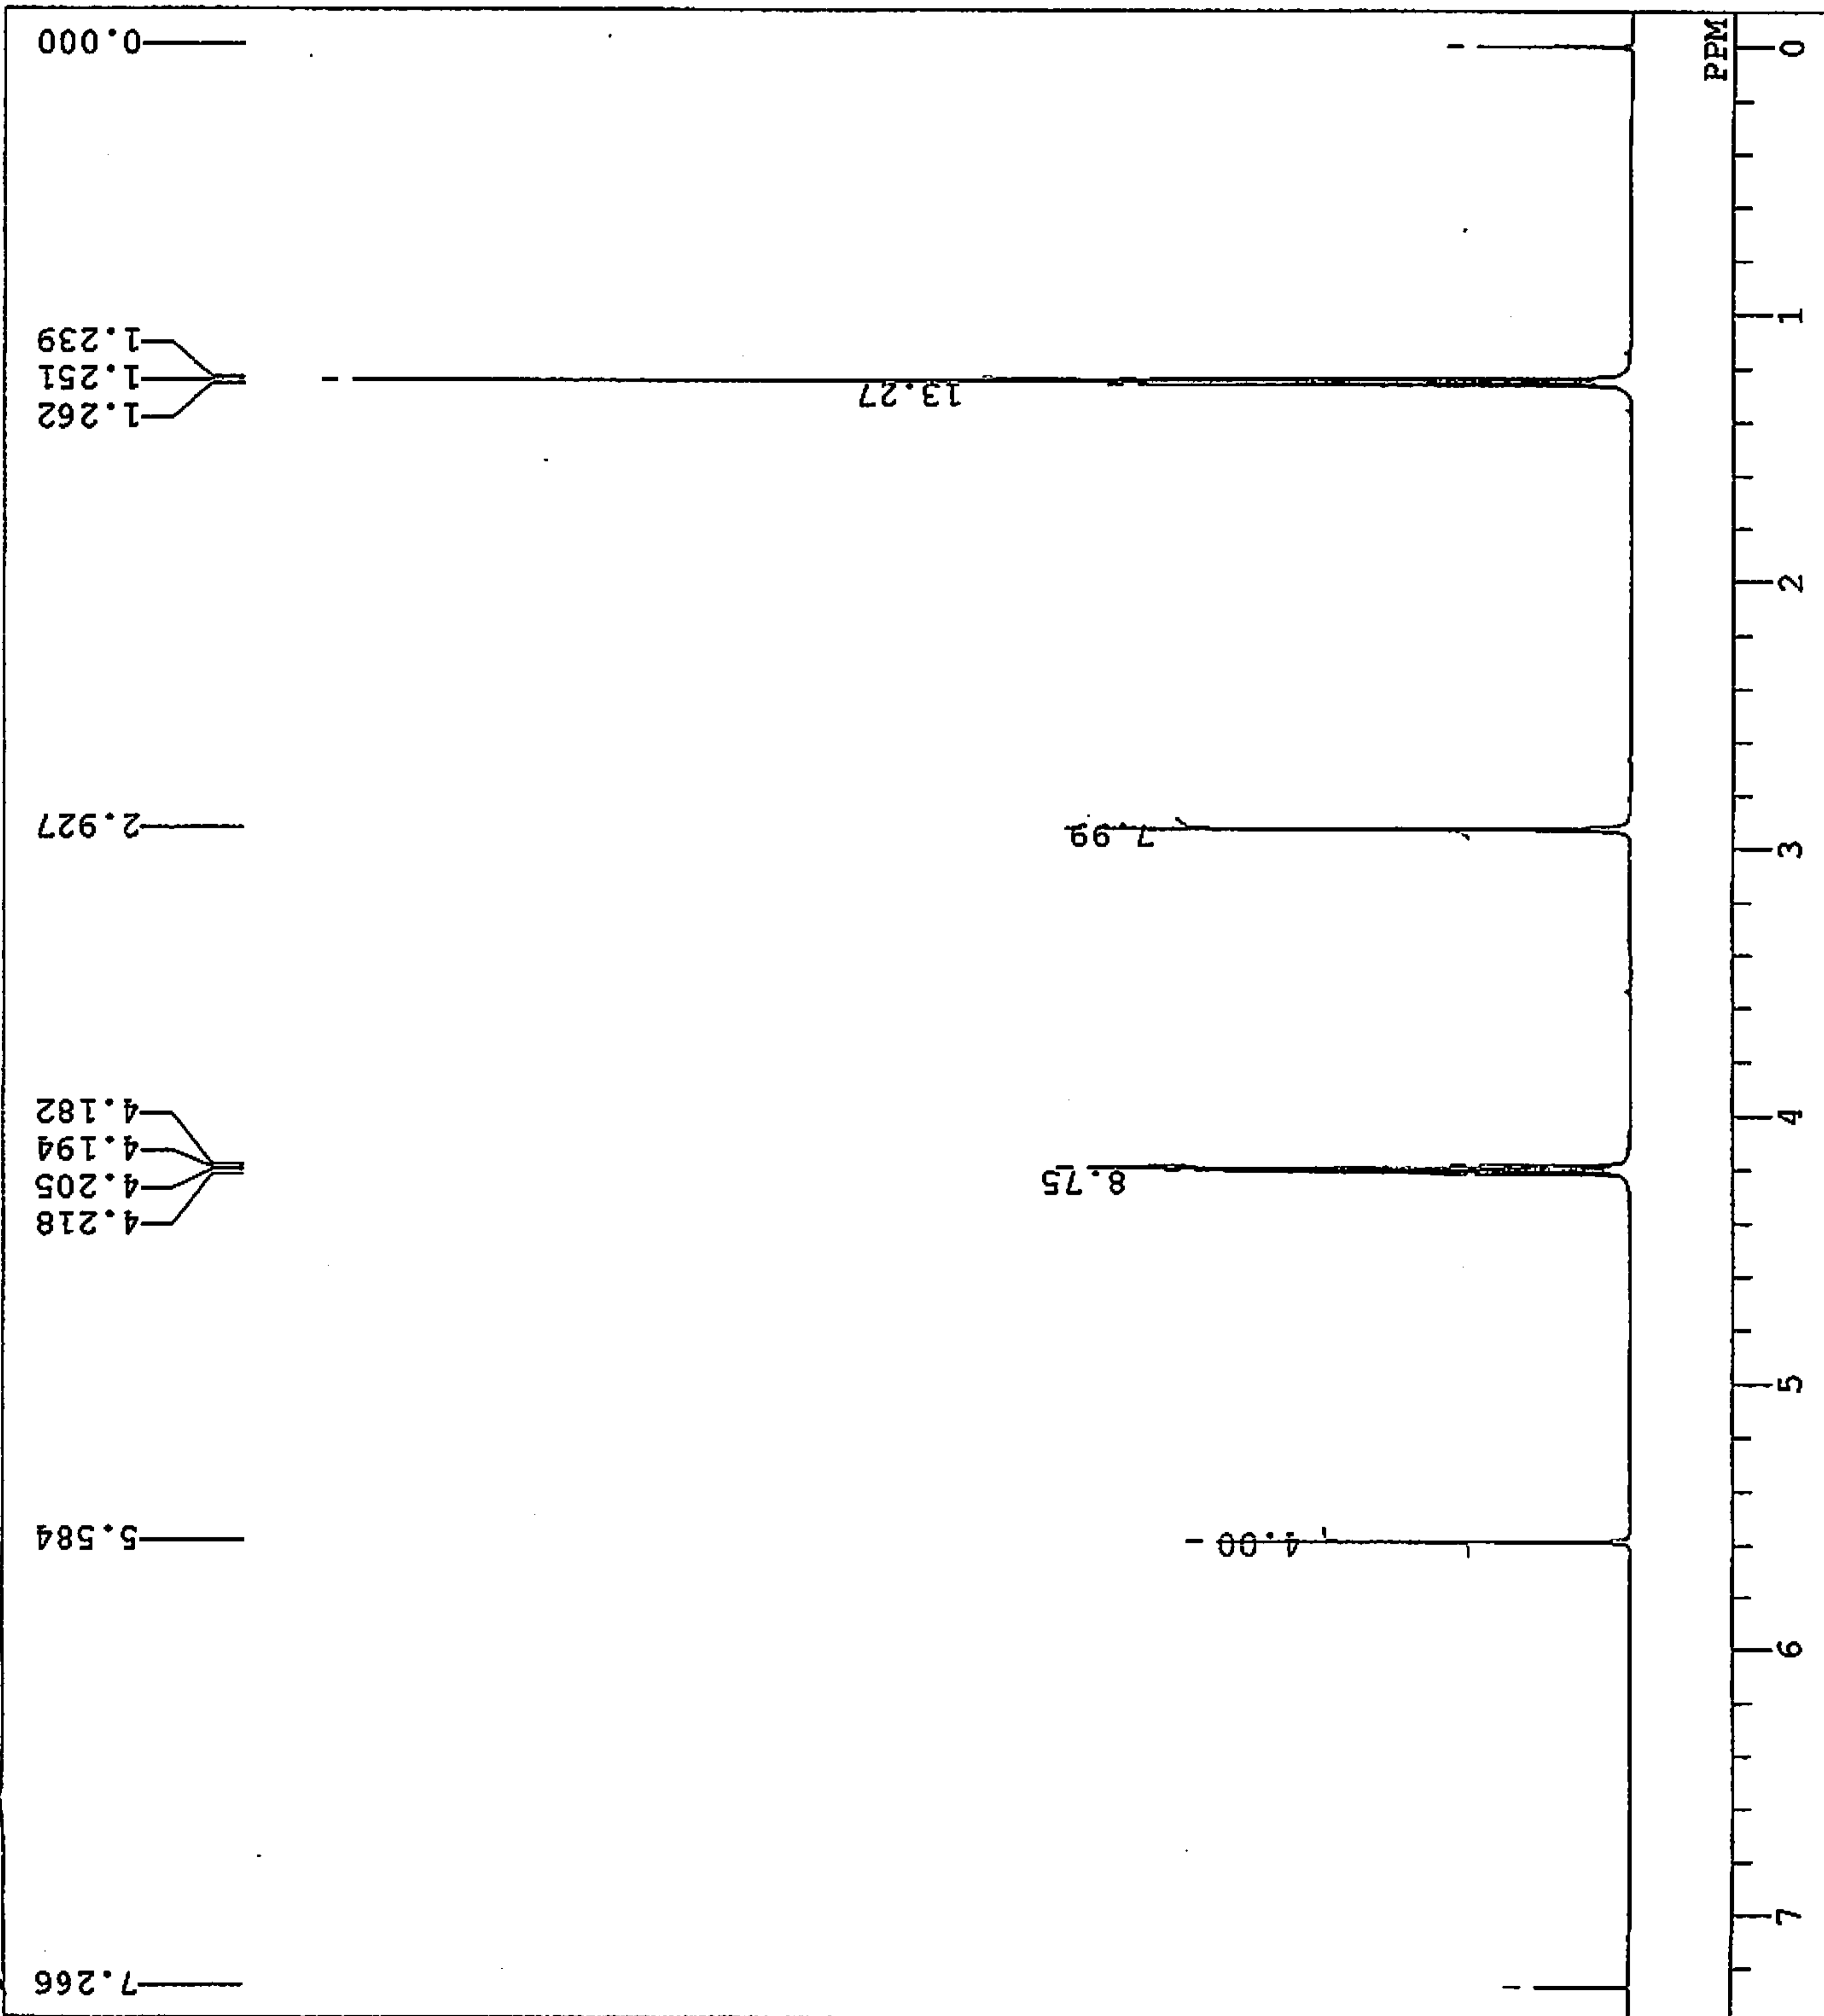

# Compound 2a

E:\COT final\Ag-COT-ethyl malonate-13C.1  
Ag-COT-ethyl malonate-13C

DFILE  
COMNT  
DATIM  
OBNUC  
EXMOD  
OBFREQ  
OBSETE  
OBFIN  
POINT  
FREQU  
SCANS  
ACQTM  
PD  
PW1  
IRNUC  
CTEMP  
SLVNT  
EXREF  
BF  
RGAIN

E:\COT final\Ag-COT-ethyl  
Ag-COT-ethyl malonate-13C  
11-03-2008 18:20:27  
13C  
single\_pulse\_dec  
150.92 MHz  
8.52 KHz  
1.74 Hz  
32768  
47348.49 Hz  
500  
0.6921 sec  
2.0000 sec  
3.67 usec  
1H  
23.7 C  
CDCL3  
77.00 ppm  
0.12 Hz  
60

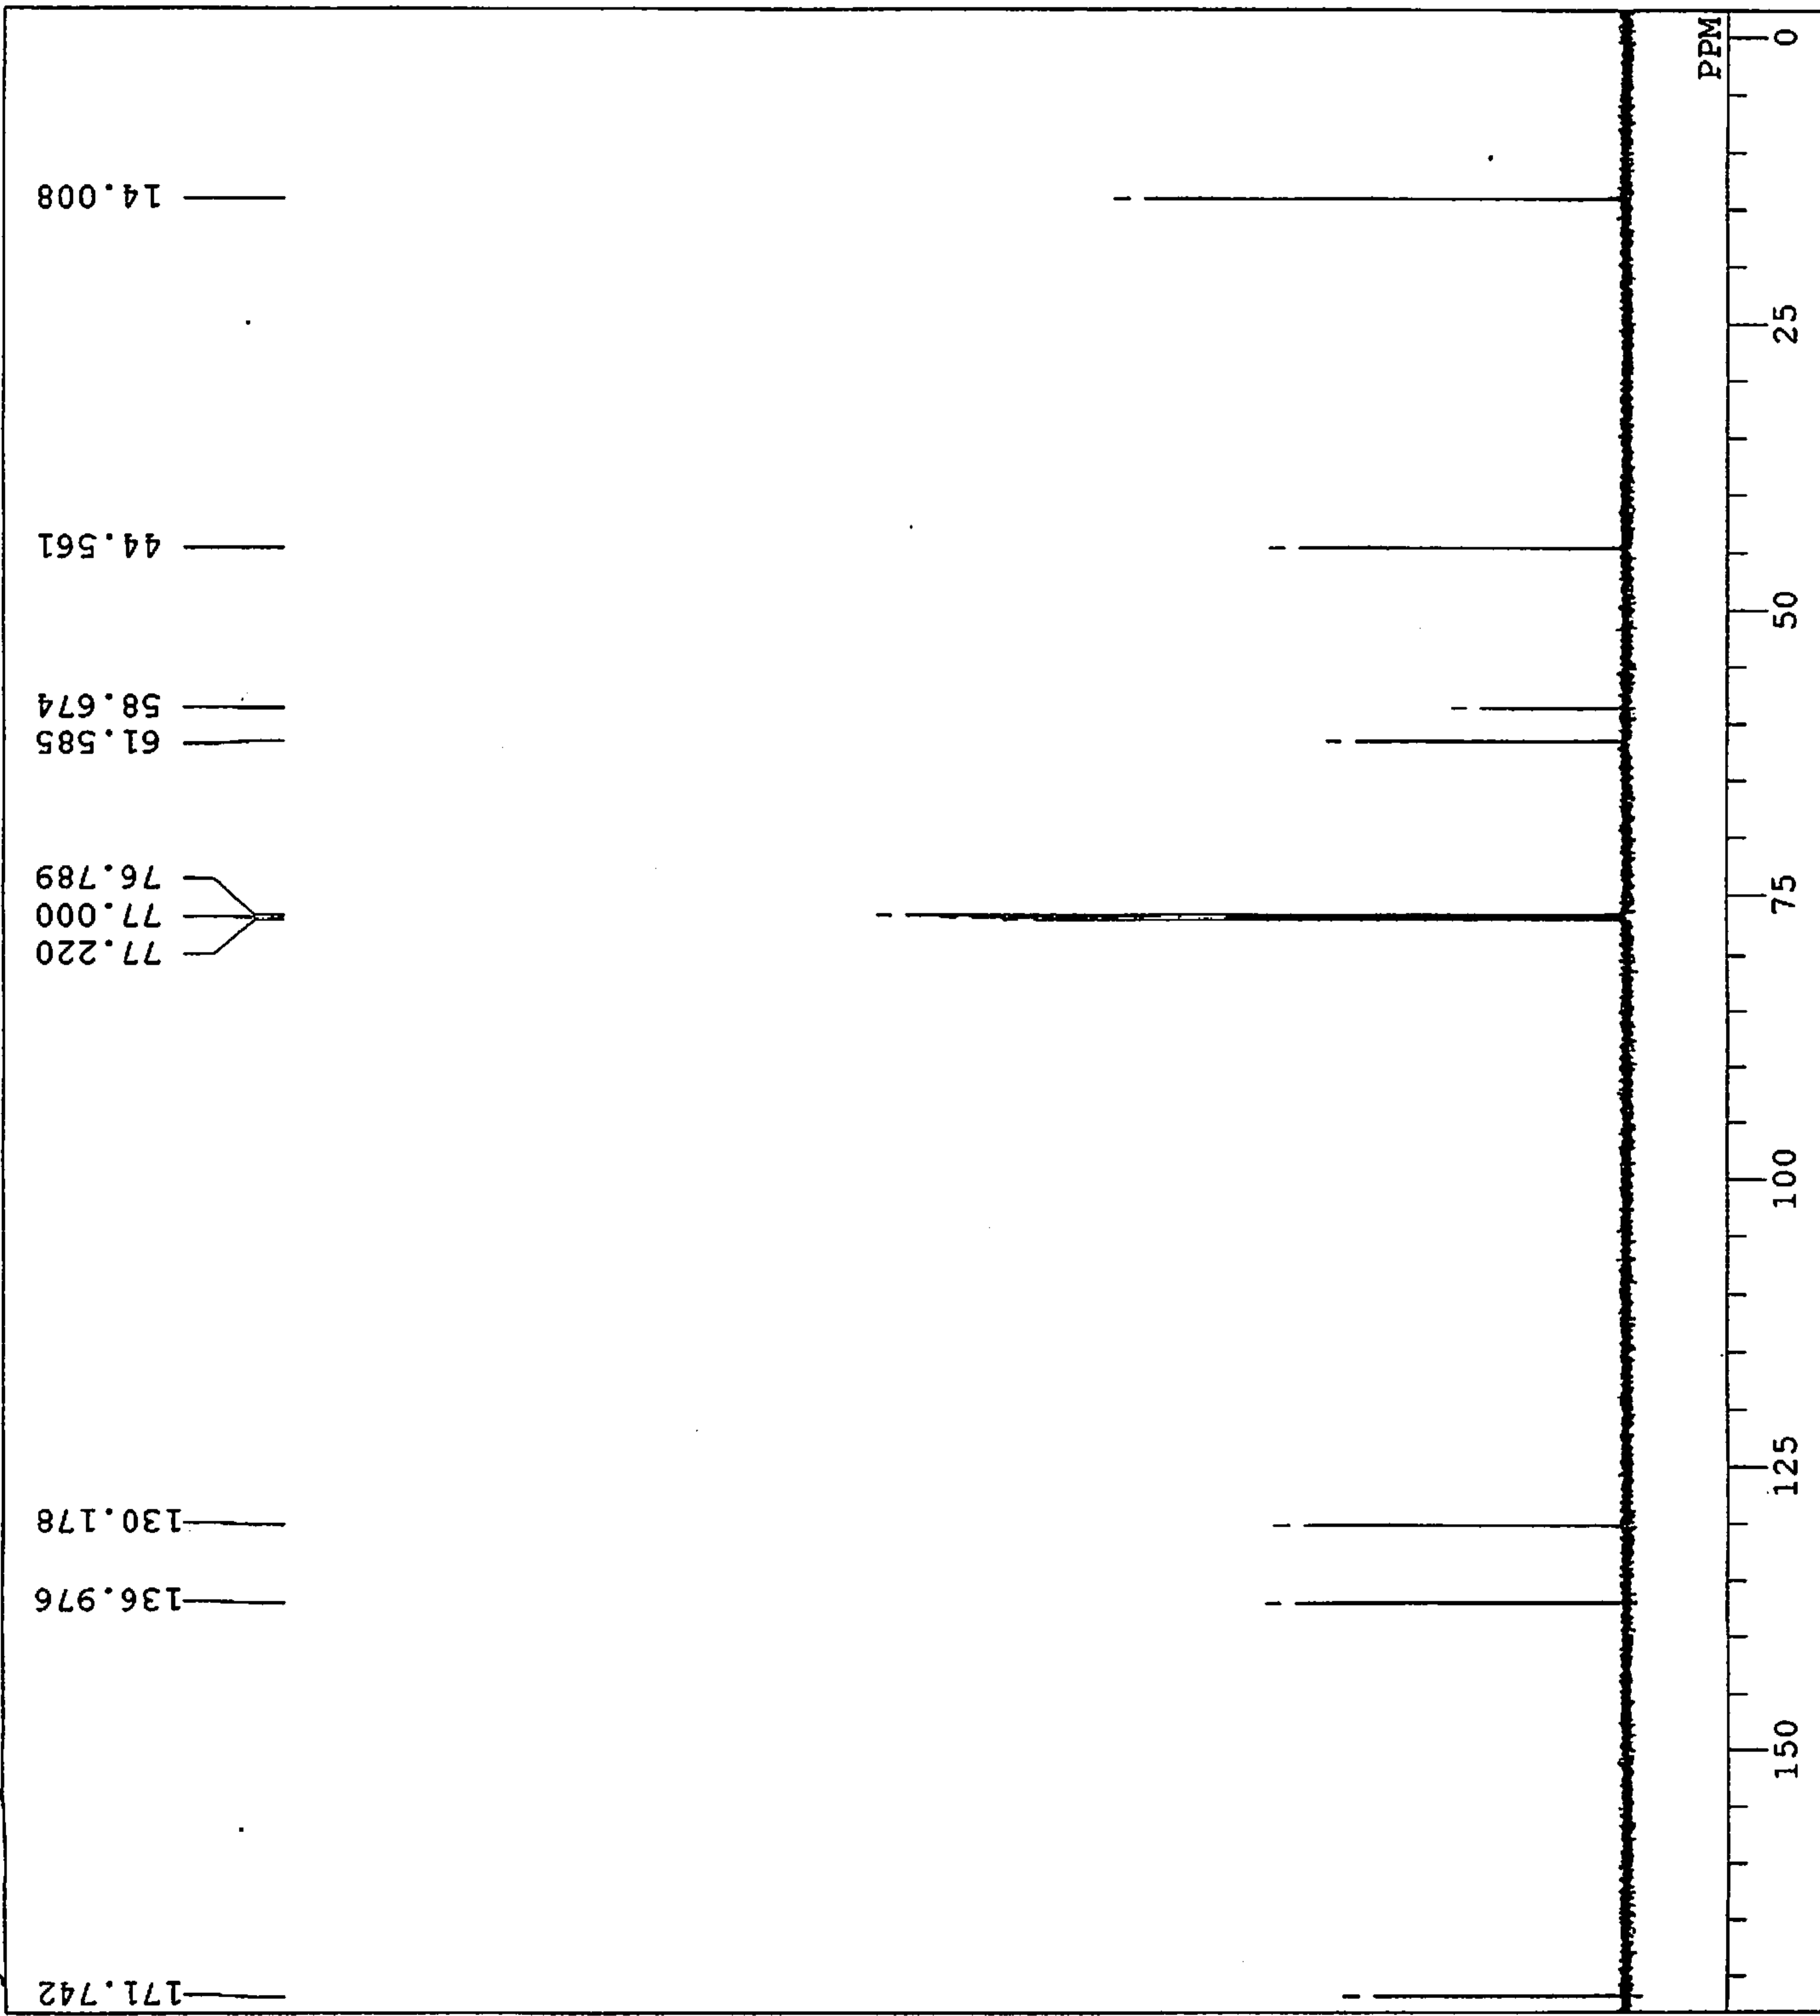



# Compound 2b

F:\480'a\Ito-488-1-pure-COT.als  
Ito-488-1-pure-COT

DFILE  
COMNT  
DATIM  
OBNUC  
EXMOD  
OBFRQ  
OBSET  
OBFIN  
POINT  
FREQU  
SCANS  
ACQTM  
PD  
PWI  
IRNUC  
CTEMP  
SLVNT  
EXREF  
BF  
RGAIN

F:\480'a\Ito-488-1-pur-  
Ito-488-1-pure-COT  
16-05-2008 13:03:15  
1H  
single\_pulse.ex2  
600.17 MHz  
5.30 KHz  
5.47 Hz  
13107  
9008.87 Hz  
16  
1.4549 sec  
5.0000 sec  
6.00 usec  
1H  
24.1 C  
CDCL3  
0.00 ppm  
0.12 Hz  
44

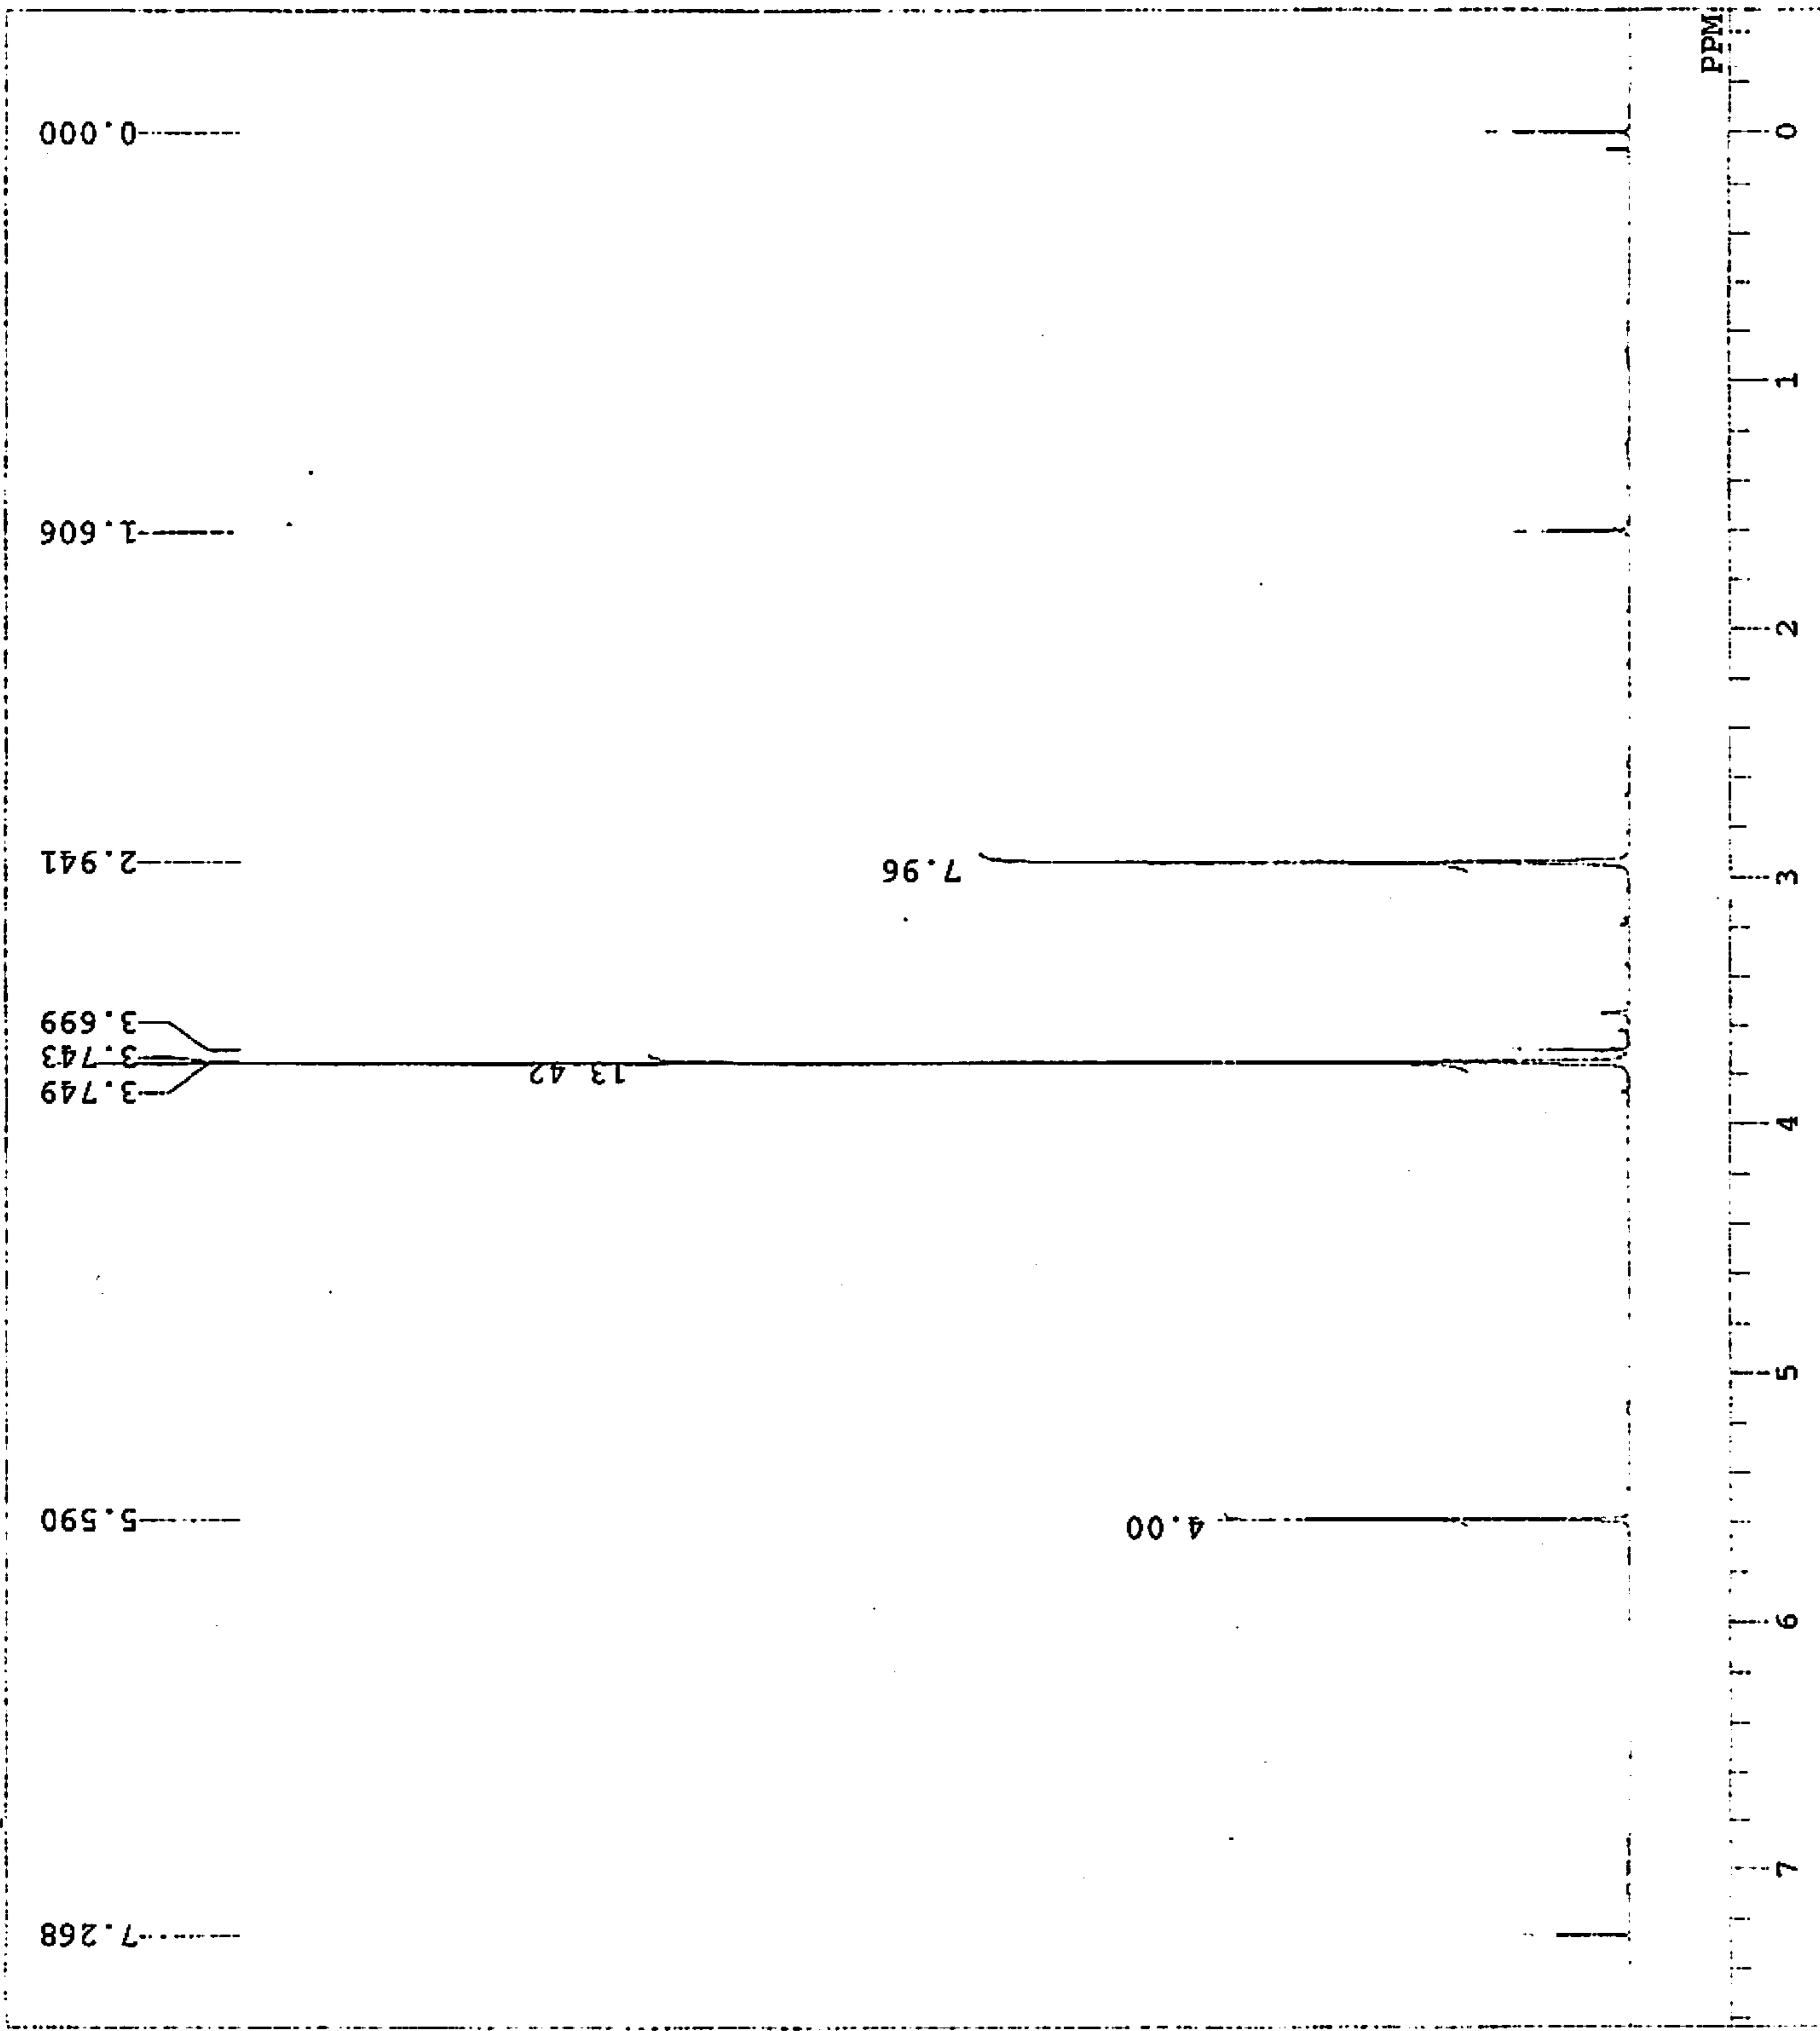

# Compound 2b

E:\Ito-488-1-pure-COT-C. 1  
Ito-488-1-pure-COT-C

DFILE E:\Ito-488-1-pure-COT-C. 1  
COMNT Ito-488-1-pure-COT-C  
DATIM 16-05-2008 13:13:48  
OBNUC 13C

single\_pulse\_dec  
OBFRQ 150.92 MHz  
OBSET 8.52 KHz  
OBFIN 1.74 Hz  
POINT 32768  
FREQU 47348.49 Hz  
SCANS 217  
ACQTM 0.6921 sec  
PD 2.0000 sec  
PW1 4.00 usec  
IRNUC 1H  
CTEMP 24.5 c  
SLVNT CDCL3  
EXREF 77.00 ppm  
BF 0.12 Hz  
RGAIN 60

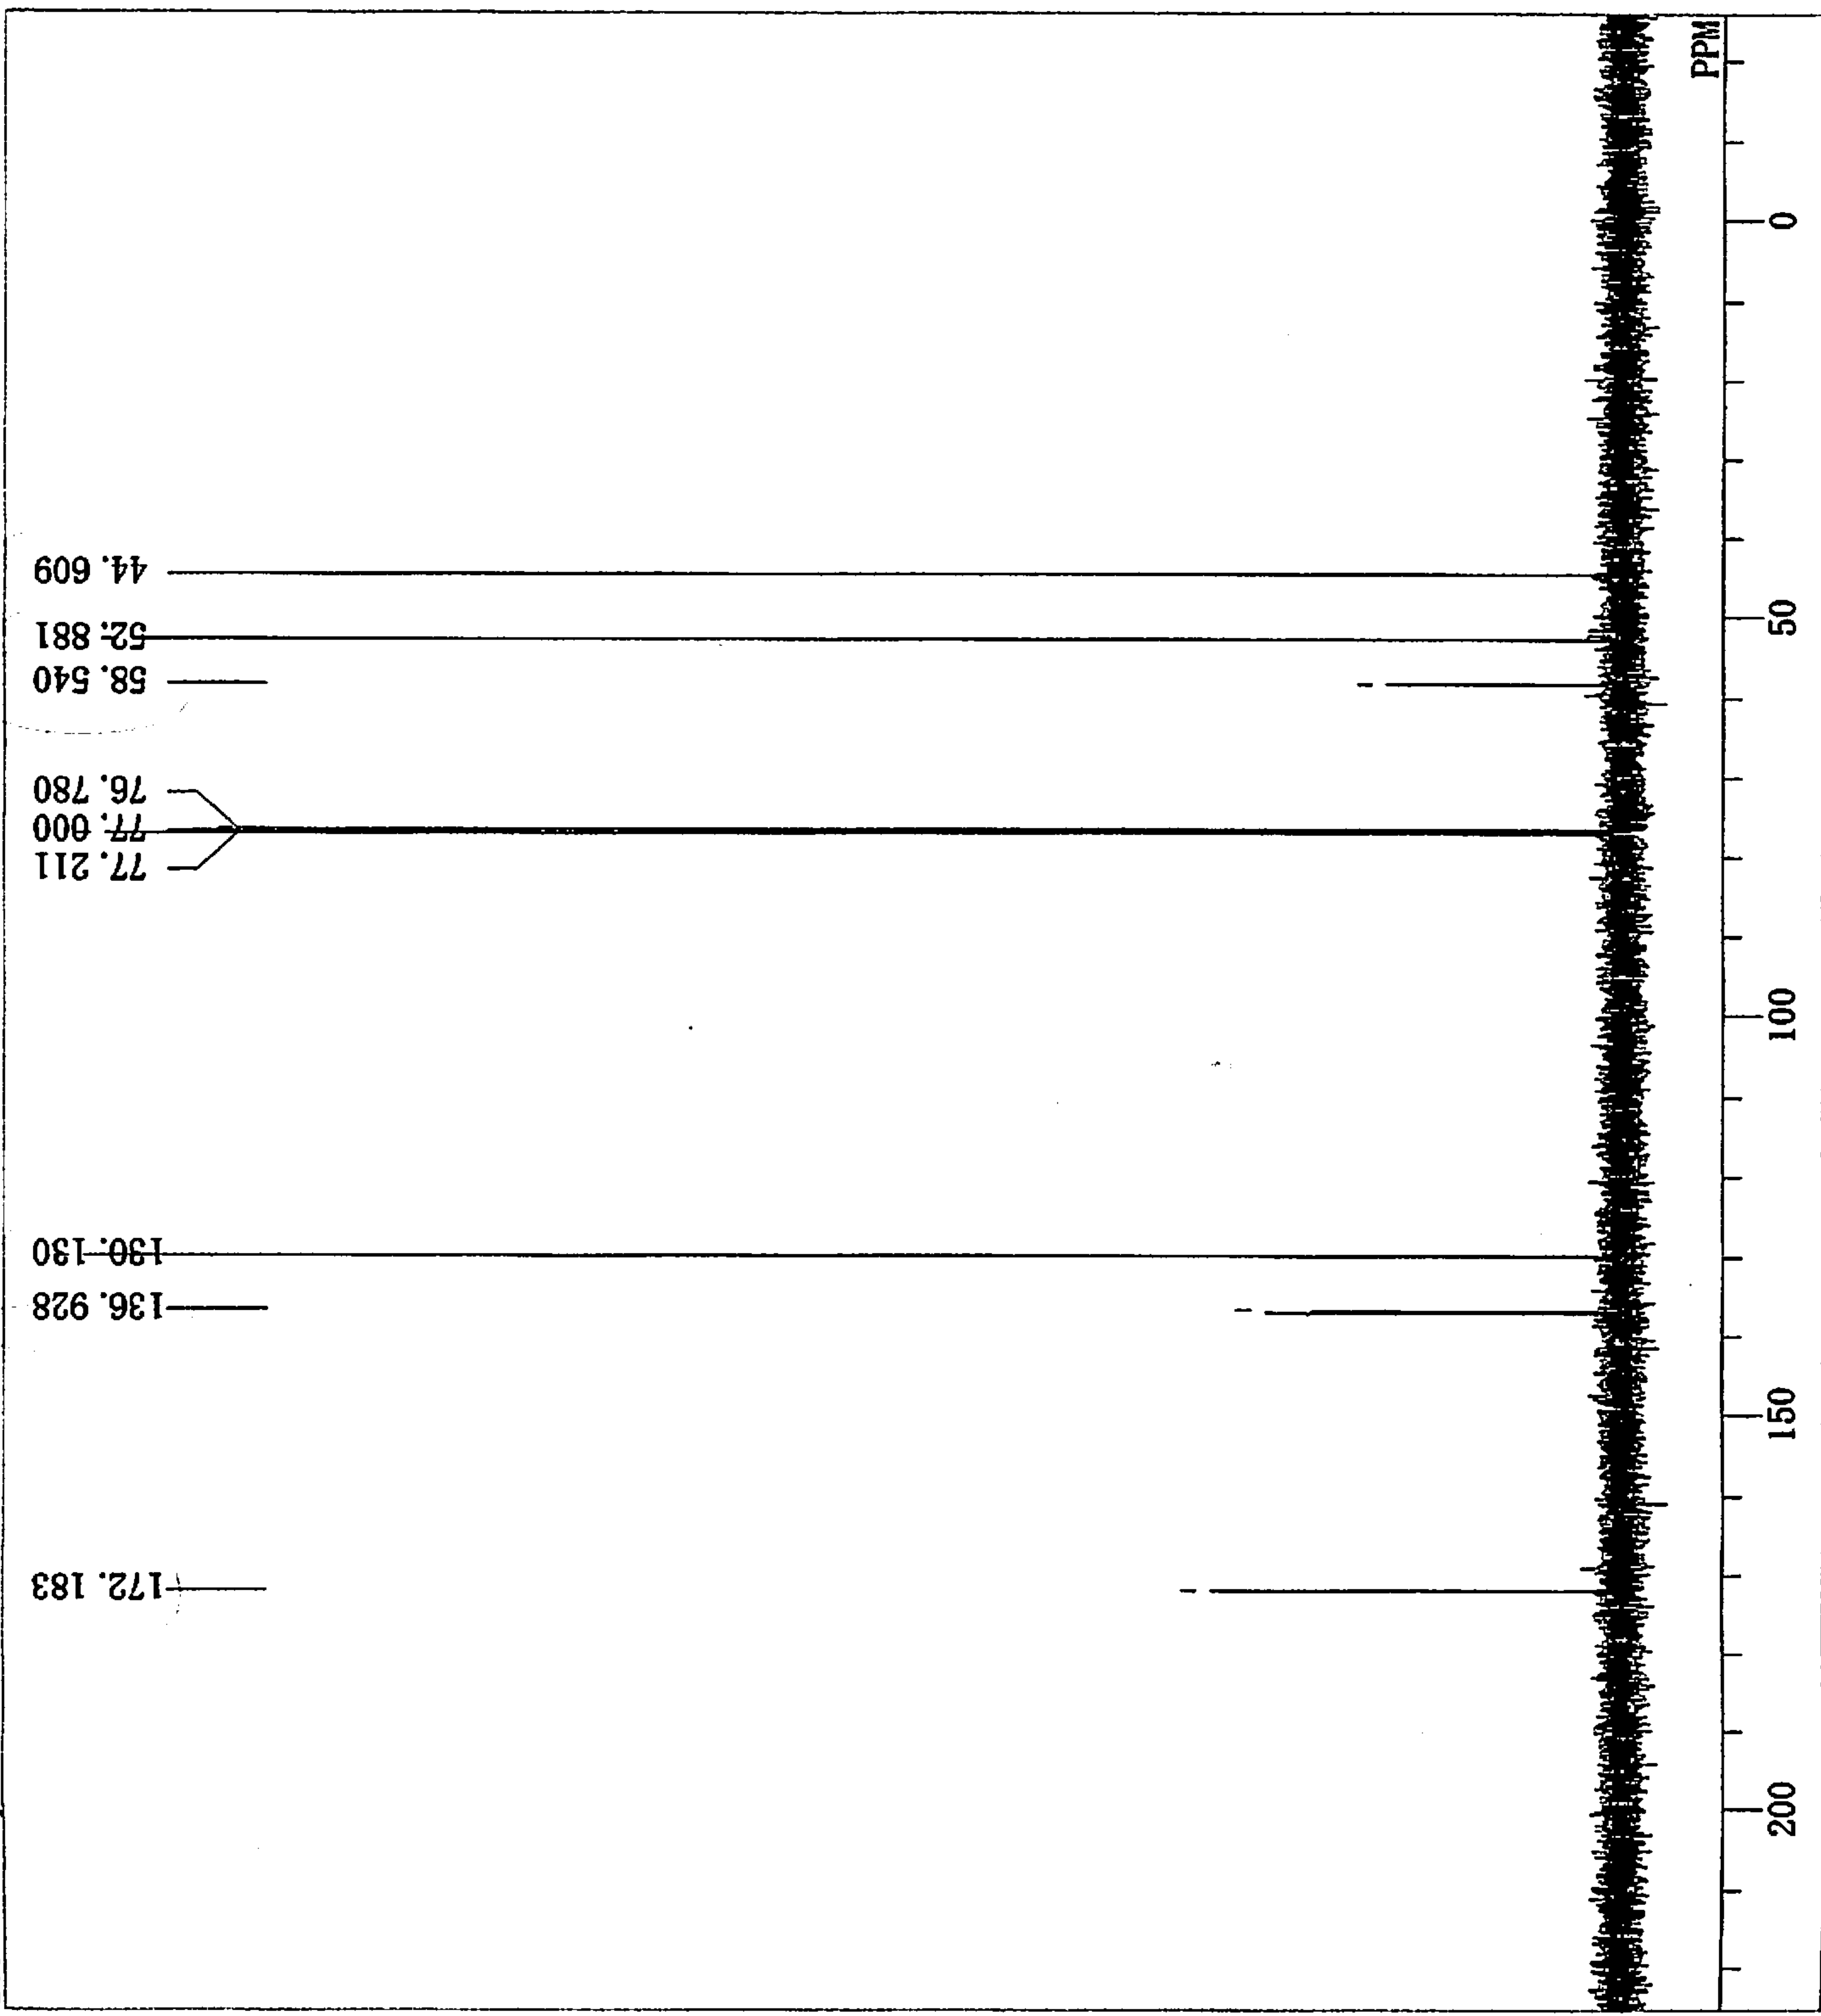

E:\490代\Ito-493-1-pure-COT. 1  
Ito-493-1-pure-COT

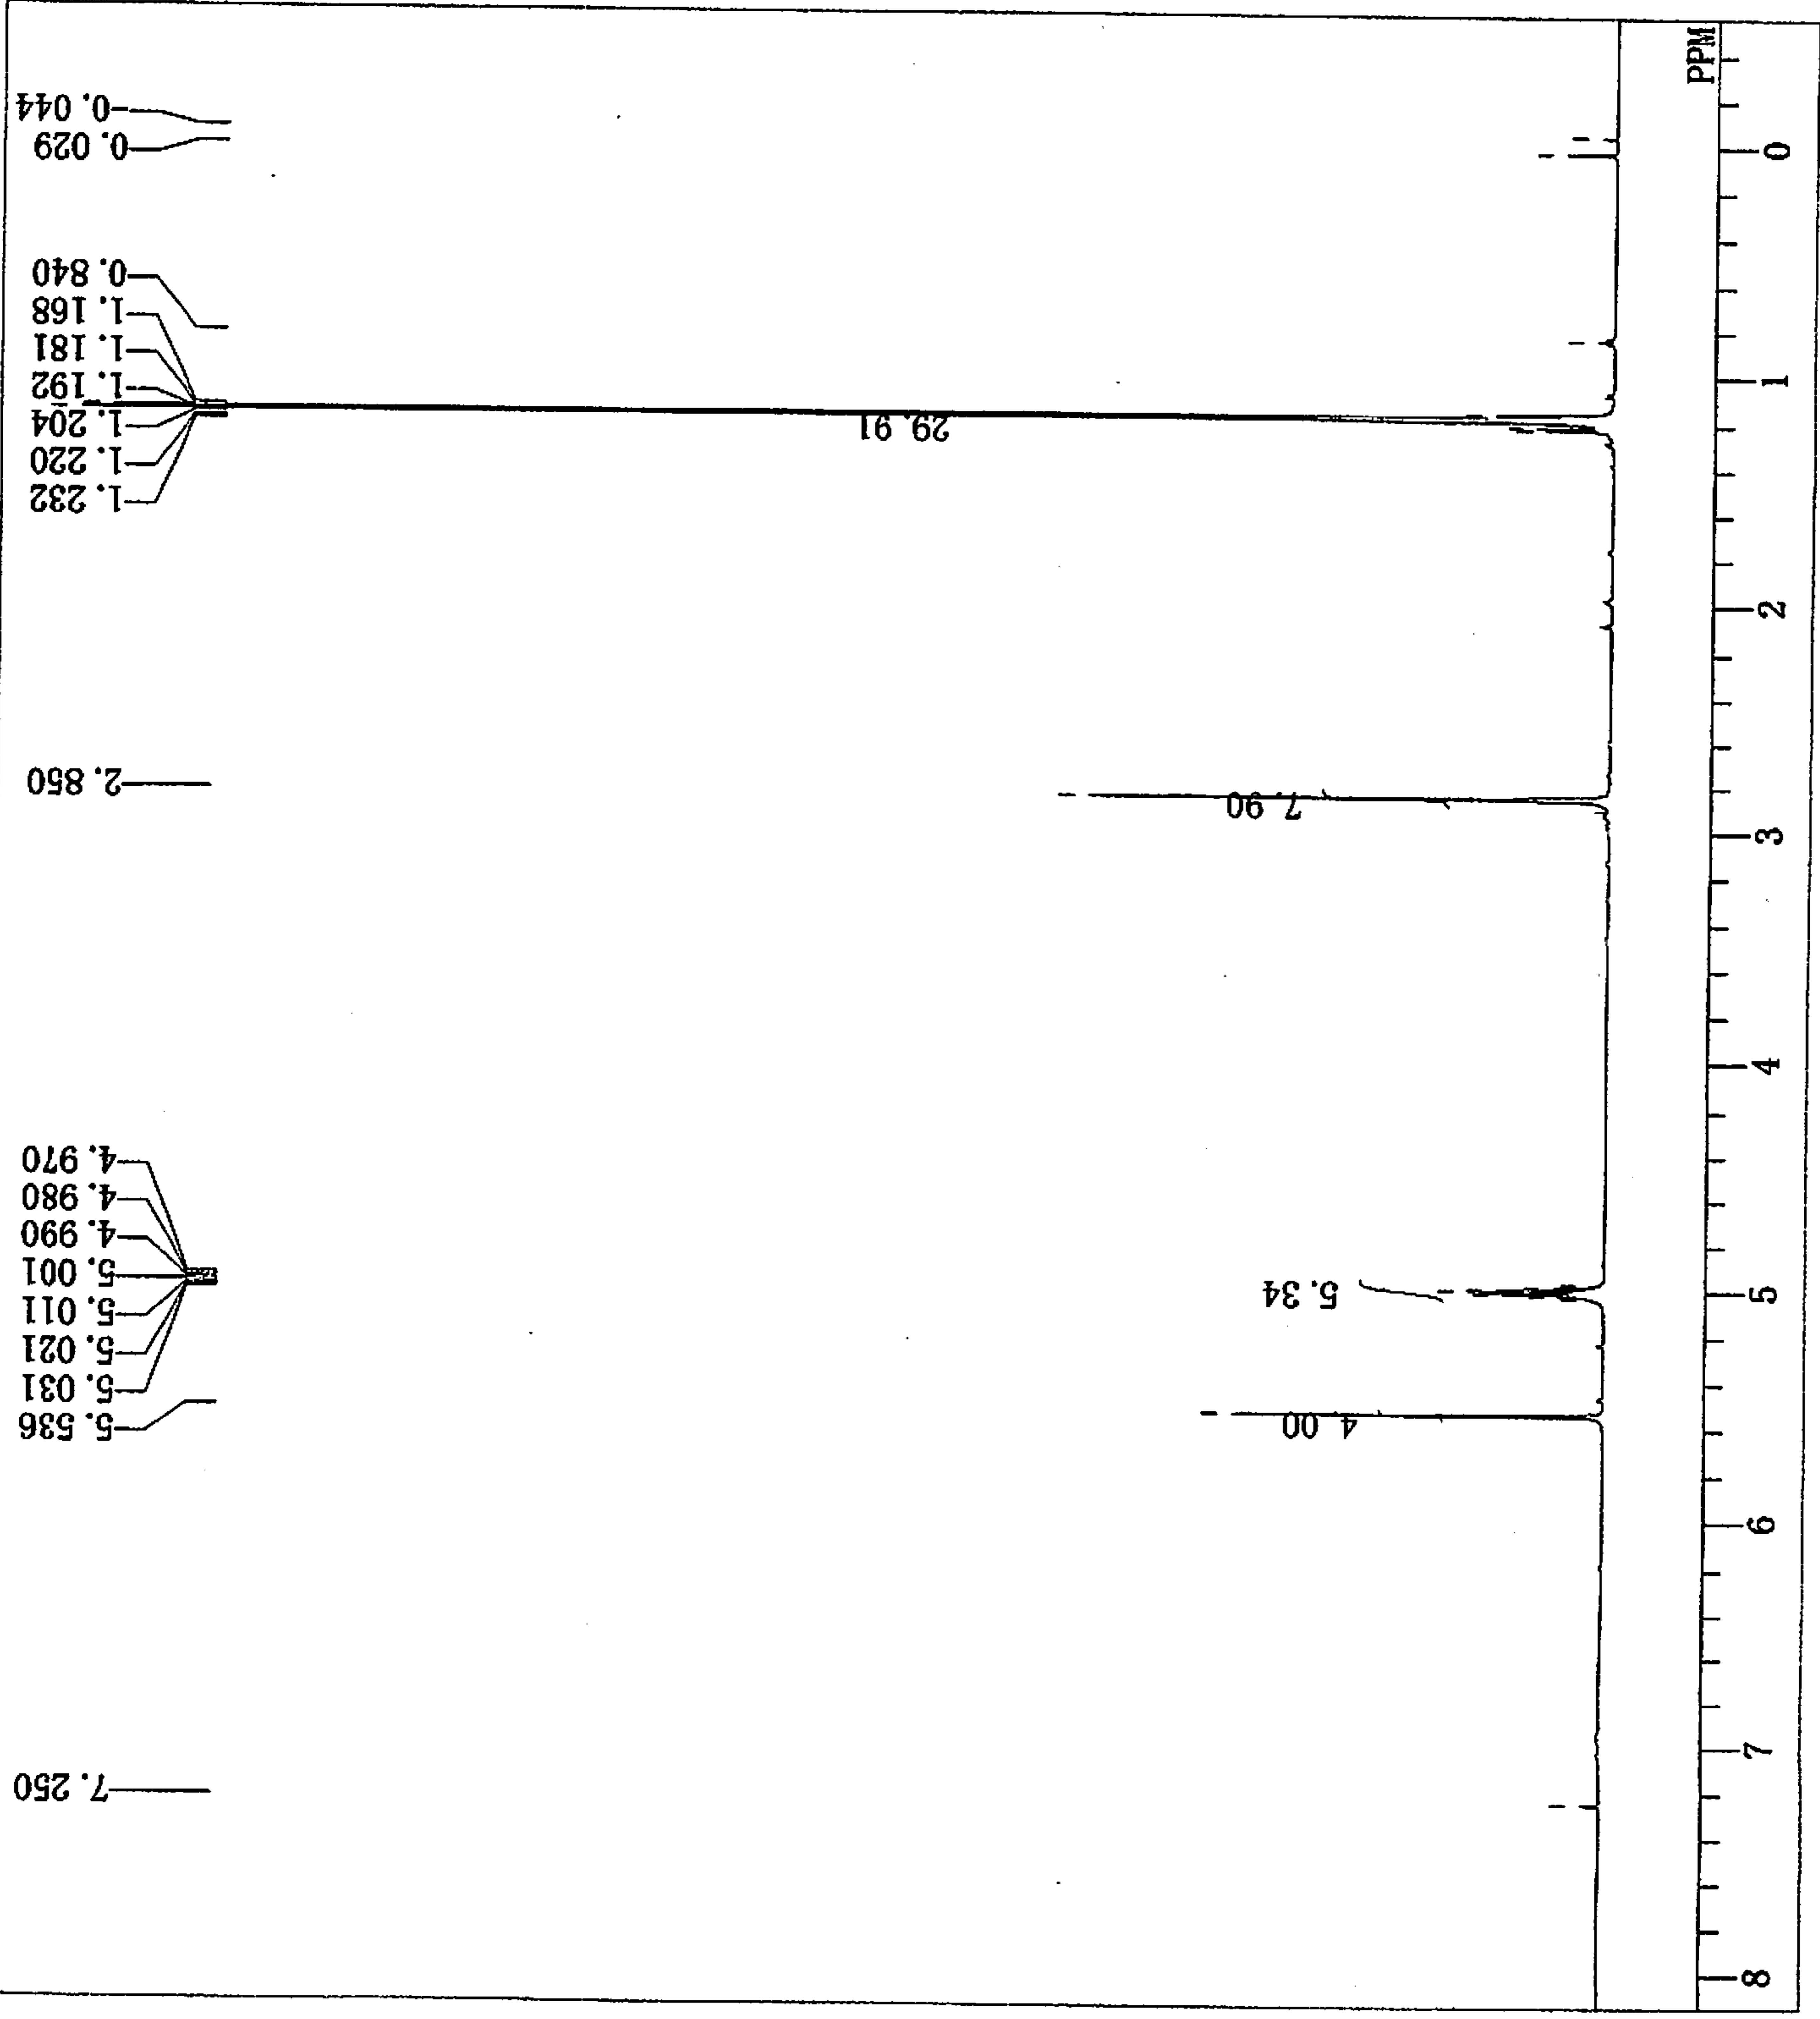

DFILE  
COMNT  
DATIM  
OBNUC  
EXMOD  
OBFRQ  
OBSET  
OBFIN  
POINT  
FREQU  
SCANS  
ACQTM  
PD  
PWI  
IRNUC  
CTEMP  
SLVNT  
EXREF  
BF  
RGAIN

E:\490代\Ito-493-1-pure-COT. 1  
Ito-493-1-pure-COT  
17-05-2008 20:30:60  
1H  
single\_pulse.ex2  
600.17 MHz  
5.30 KHz  
5.47 Hz  
16384  
11261.26 Hz  
16  
1.4549 sec  
5.0000 sec  
6.00 usec  
1H  
23.7 c  
CDCL3  
7.25 ppm  
0.12 Hz  
30

# Compound 2c



# Compound 2c

F:\490'a\Ito-493-1-pure-COT-C.1  
Ito-493-1-pure-COT-C

D:\490'a\Ito-493-1-pur-  
Ito-493-1-pure-COT-C  
17-05-2008 20:33:47  
13C  
single\_pulse\_dec  
150.92 MHz  
8.52 KHz  
1.74 Hz  
32768  
47348.49 Hz  
53  
0.6921 sec  
2.0000 sec  
4.00 usec  
1H  
24.4 C  
CDCL3  
77.00 ppm  
0.12 Hz  
50  
DFILE  
COMNT  
DATIM  
OBNUC  
EXMOD  
OBFRQ  
OBSET  
OBFIN  
POINT  
FREQU  
SCANS  
ACQTM  
PD  
PW1  
IRNUC  
CTEMP  
SLVNT  
EXREF  
BF  
RGAIN

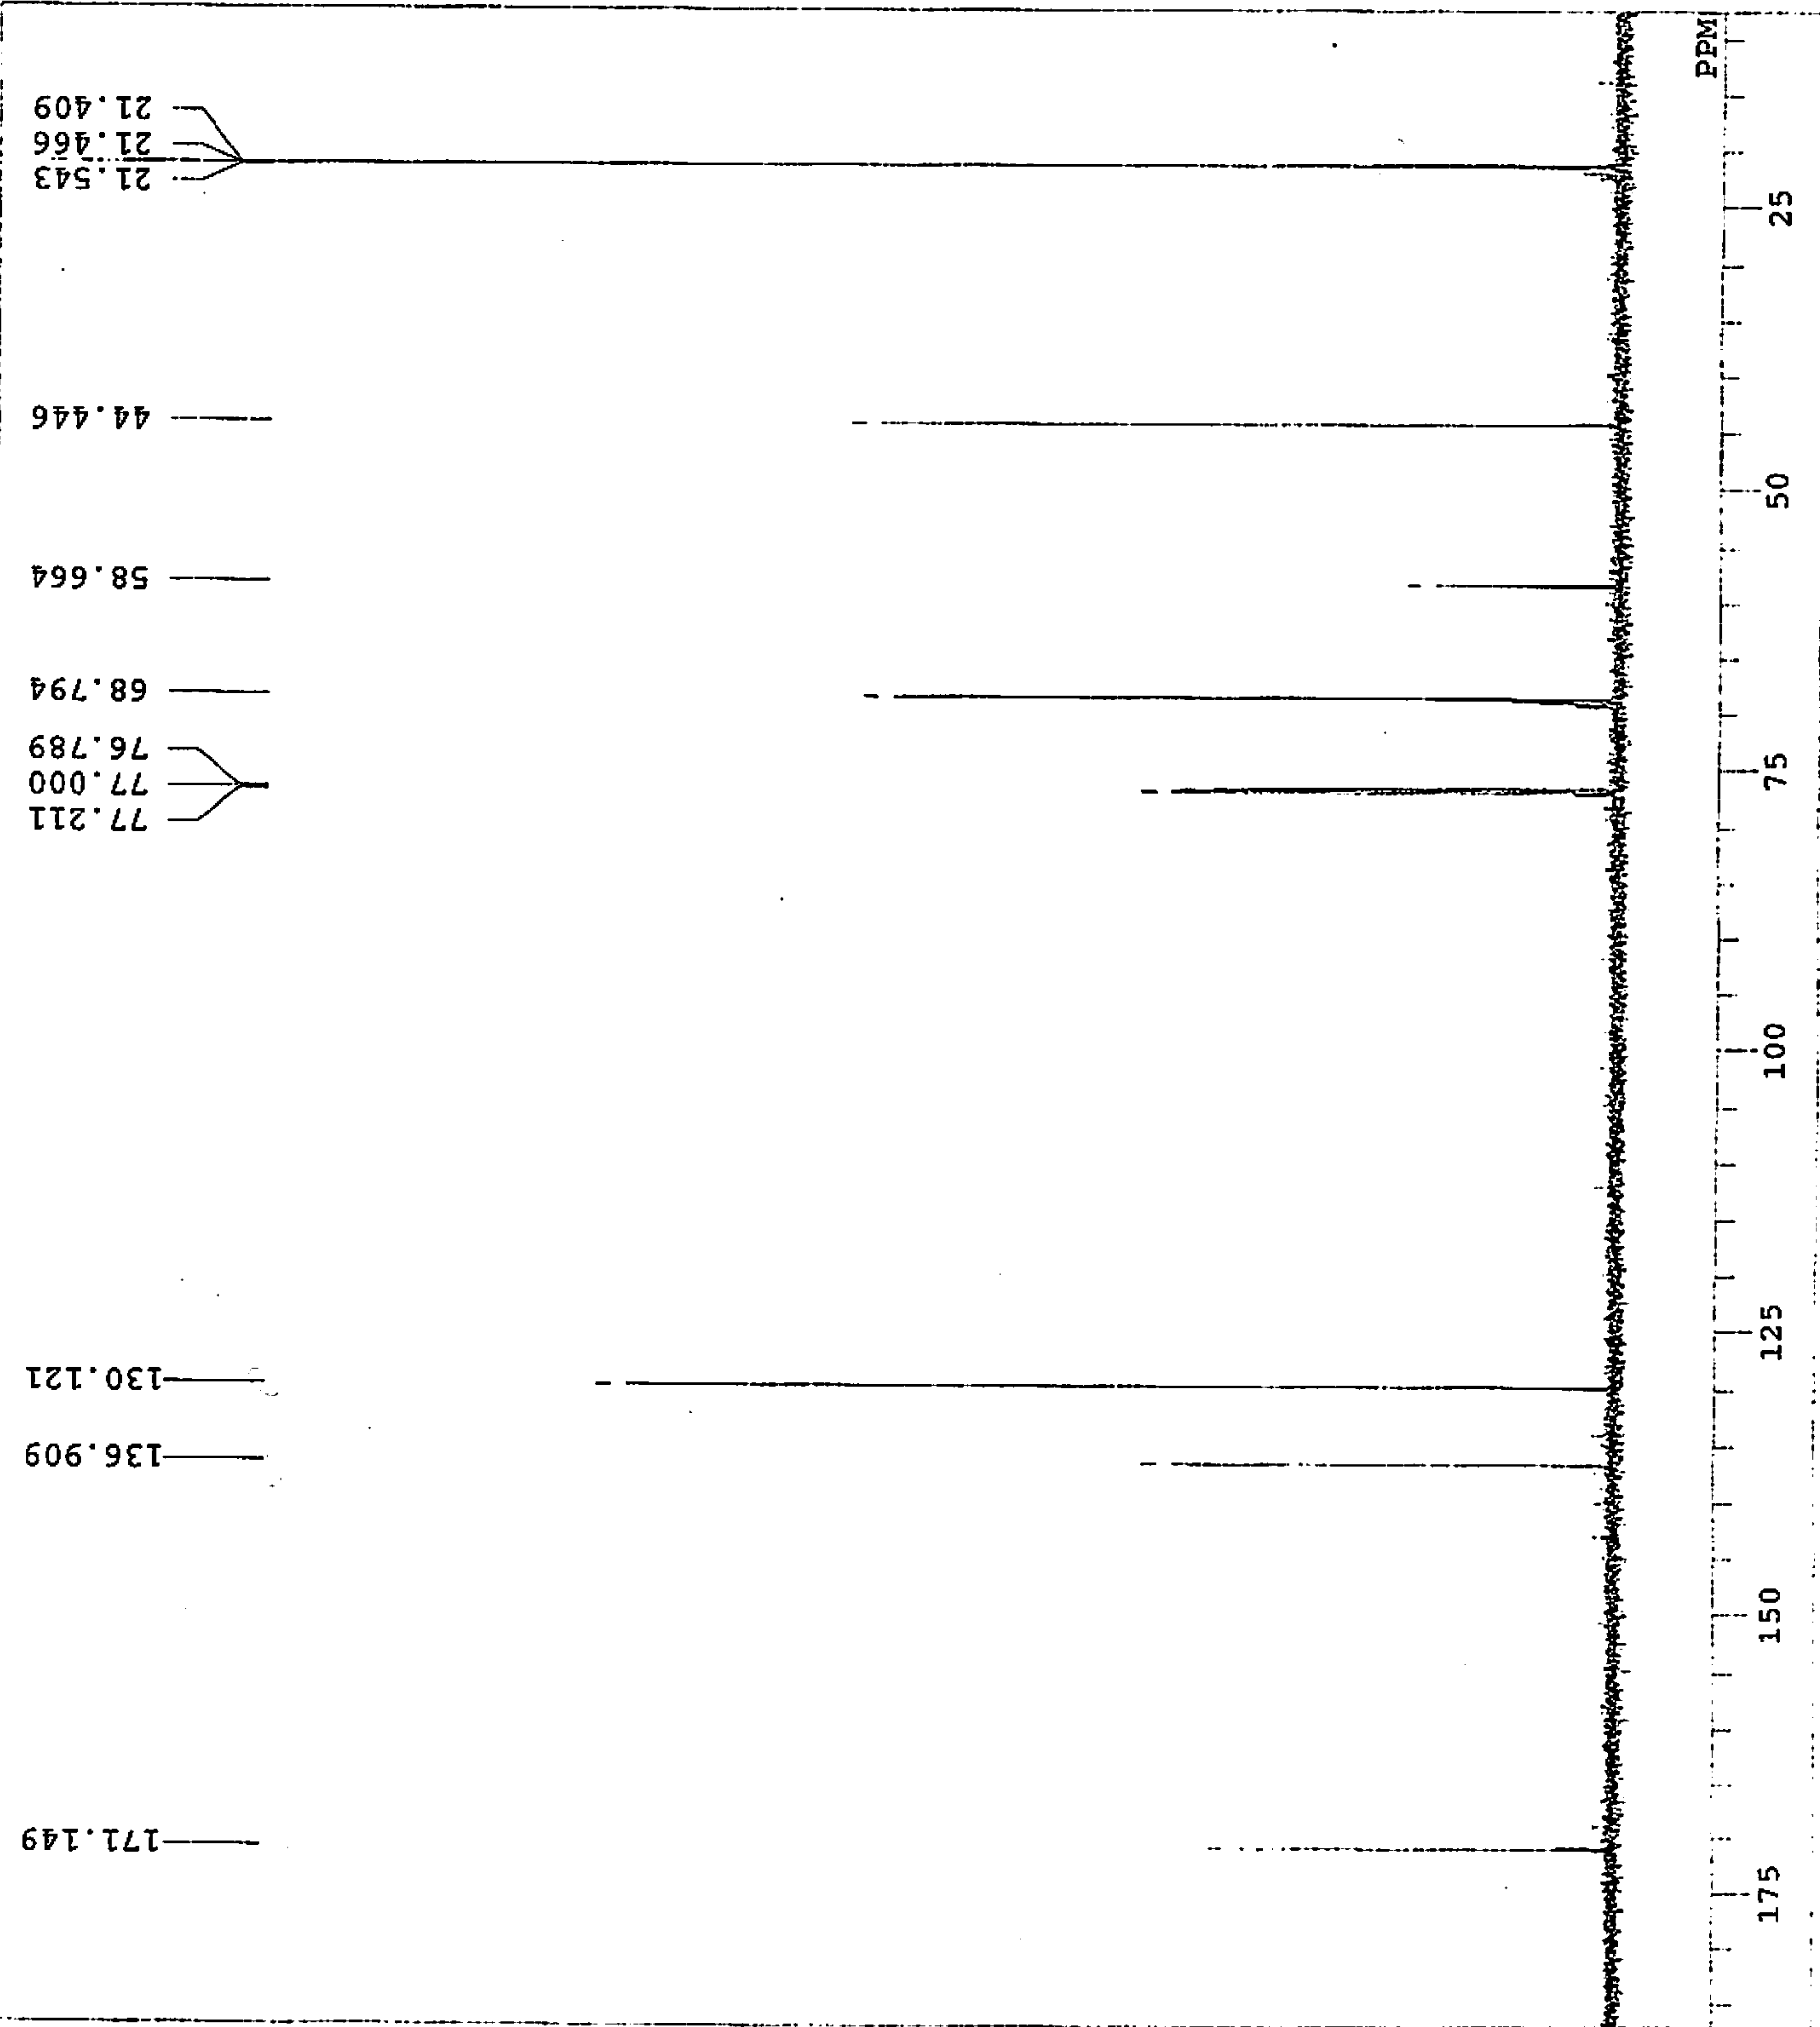

# Compound 2d

F:\470'ã\Ito-479-2-pure.1  
Ito-479-2-pure

|       |                         |
|-------|-------------------------|
| DFILE | F:\470'ã\Ito-479-2-pur. |
| COMNT | Ito-479-2-pure          |
| DATIM | 15-05-2008 14:50:08     |
| OBNUC | 1H                      |
| EXMOD | single_pulse.ex2        |
| OBFRQ | 600.17 MHz              |
| OBSET | 5.30 KHz                |
| OBFIN | 5.47 Hz                 |
| POINT | 13106                   |
| FREQU | 9008.87 Hz              |
| SCANS | 10                      |
| ACQTM | 1.4549 sec              |
| PD    | 5.0000 sec              |
| PWI   | 6.00 usec               |
| IRNUC | 1H                      |
| CTEMP | 23.7 C                  |
| SLVNT | CDCL3                   |
| EXREF | 0.00 ppm                |
| BF    | 0.12 Hz                 |
| RGAIN | 50                      |

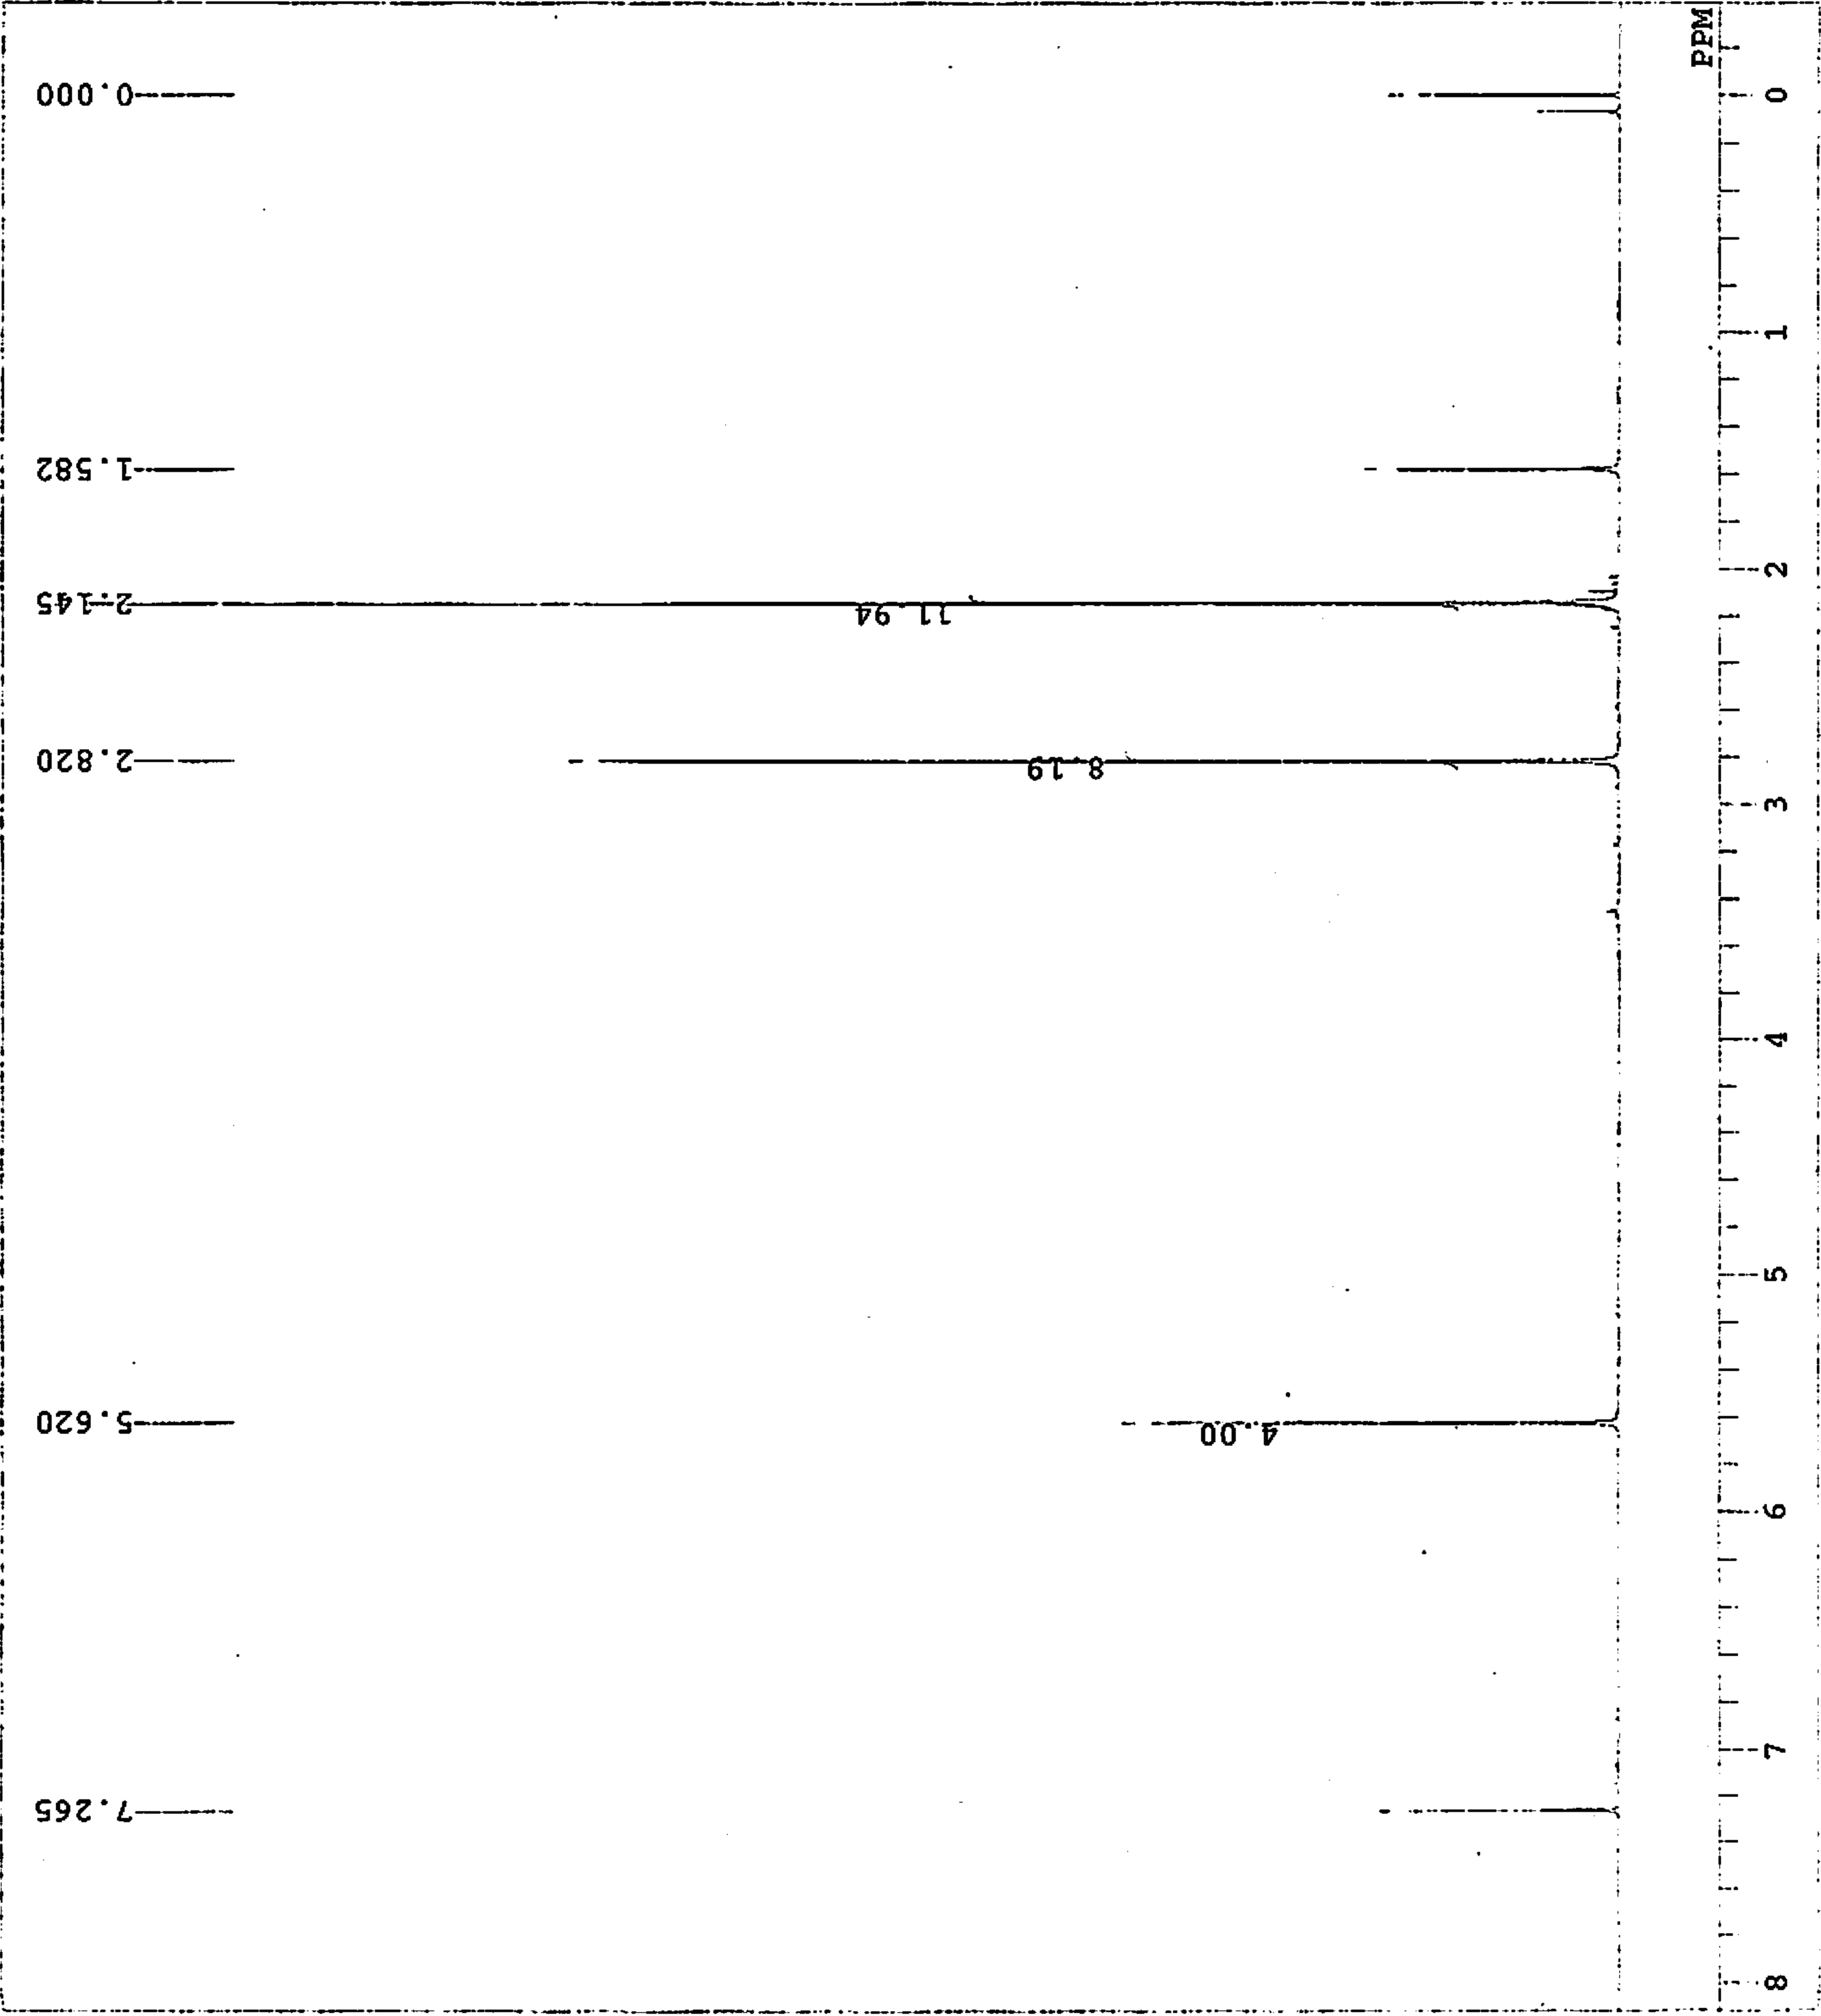

Q

E:\Ito-479-2-pure-C. 1  
Ito-479-2-pure-C

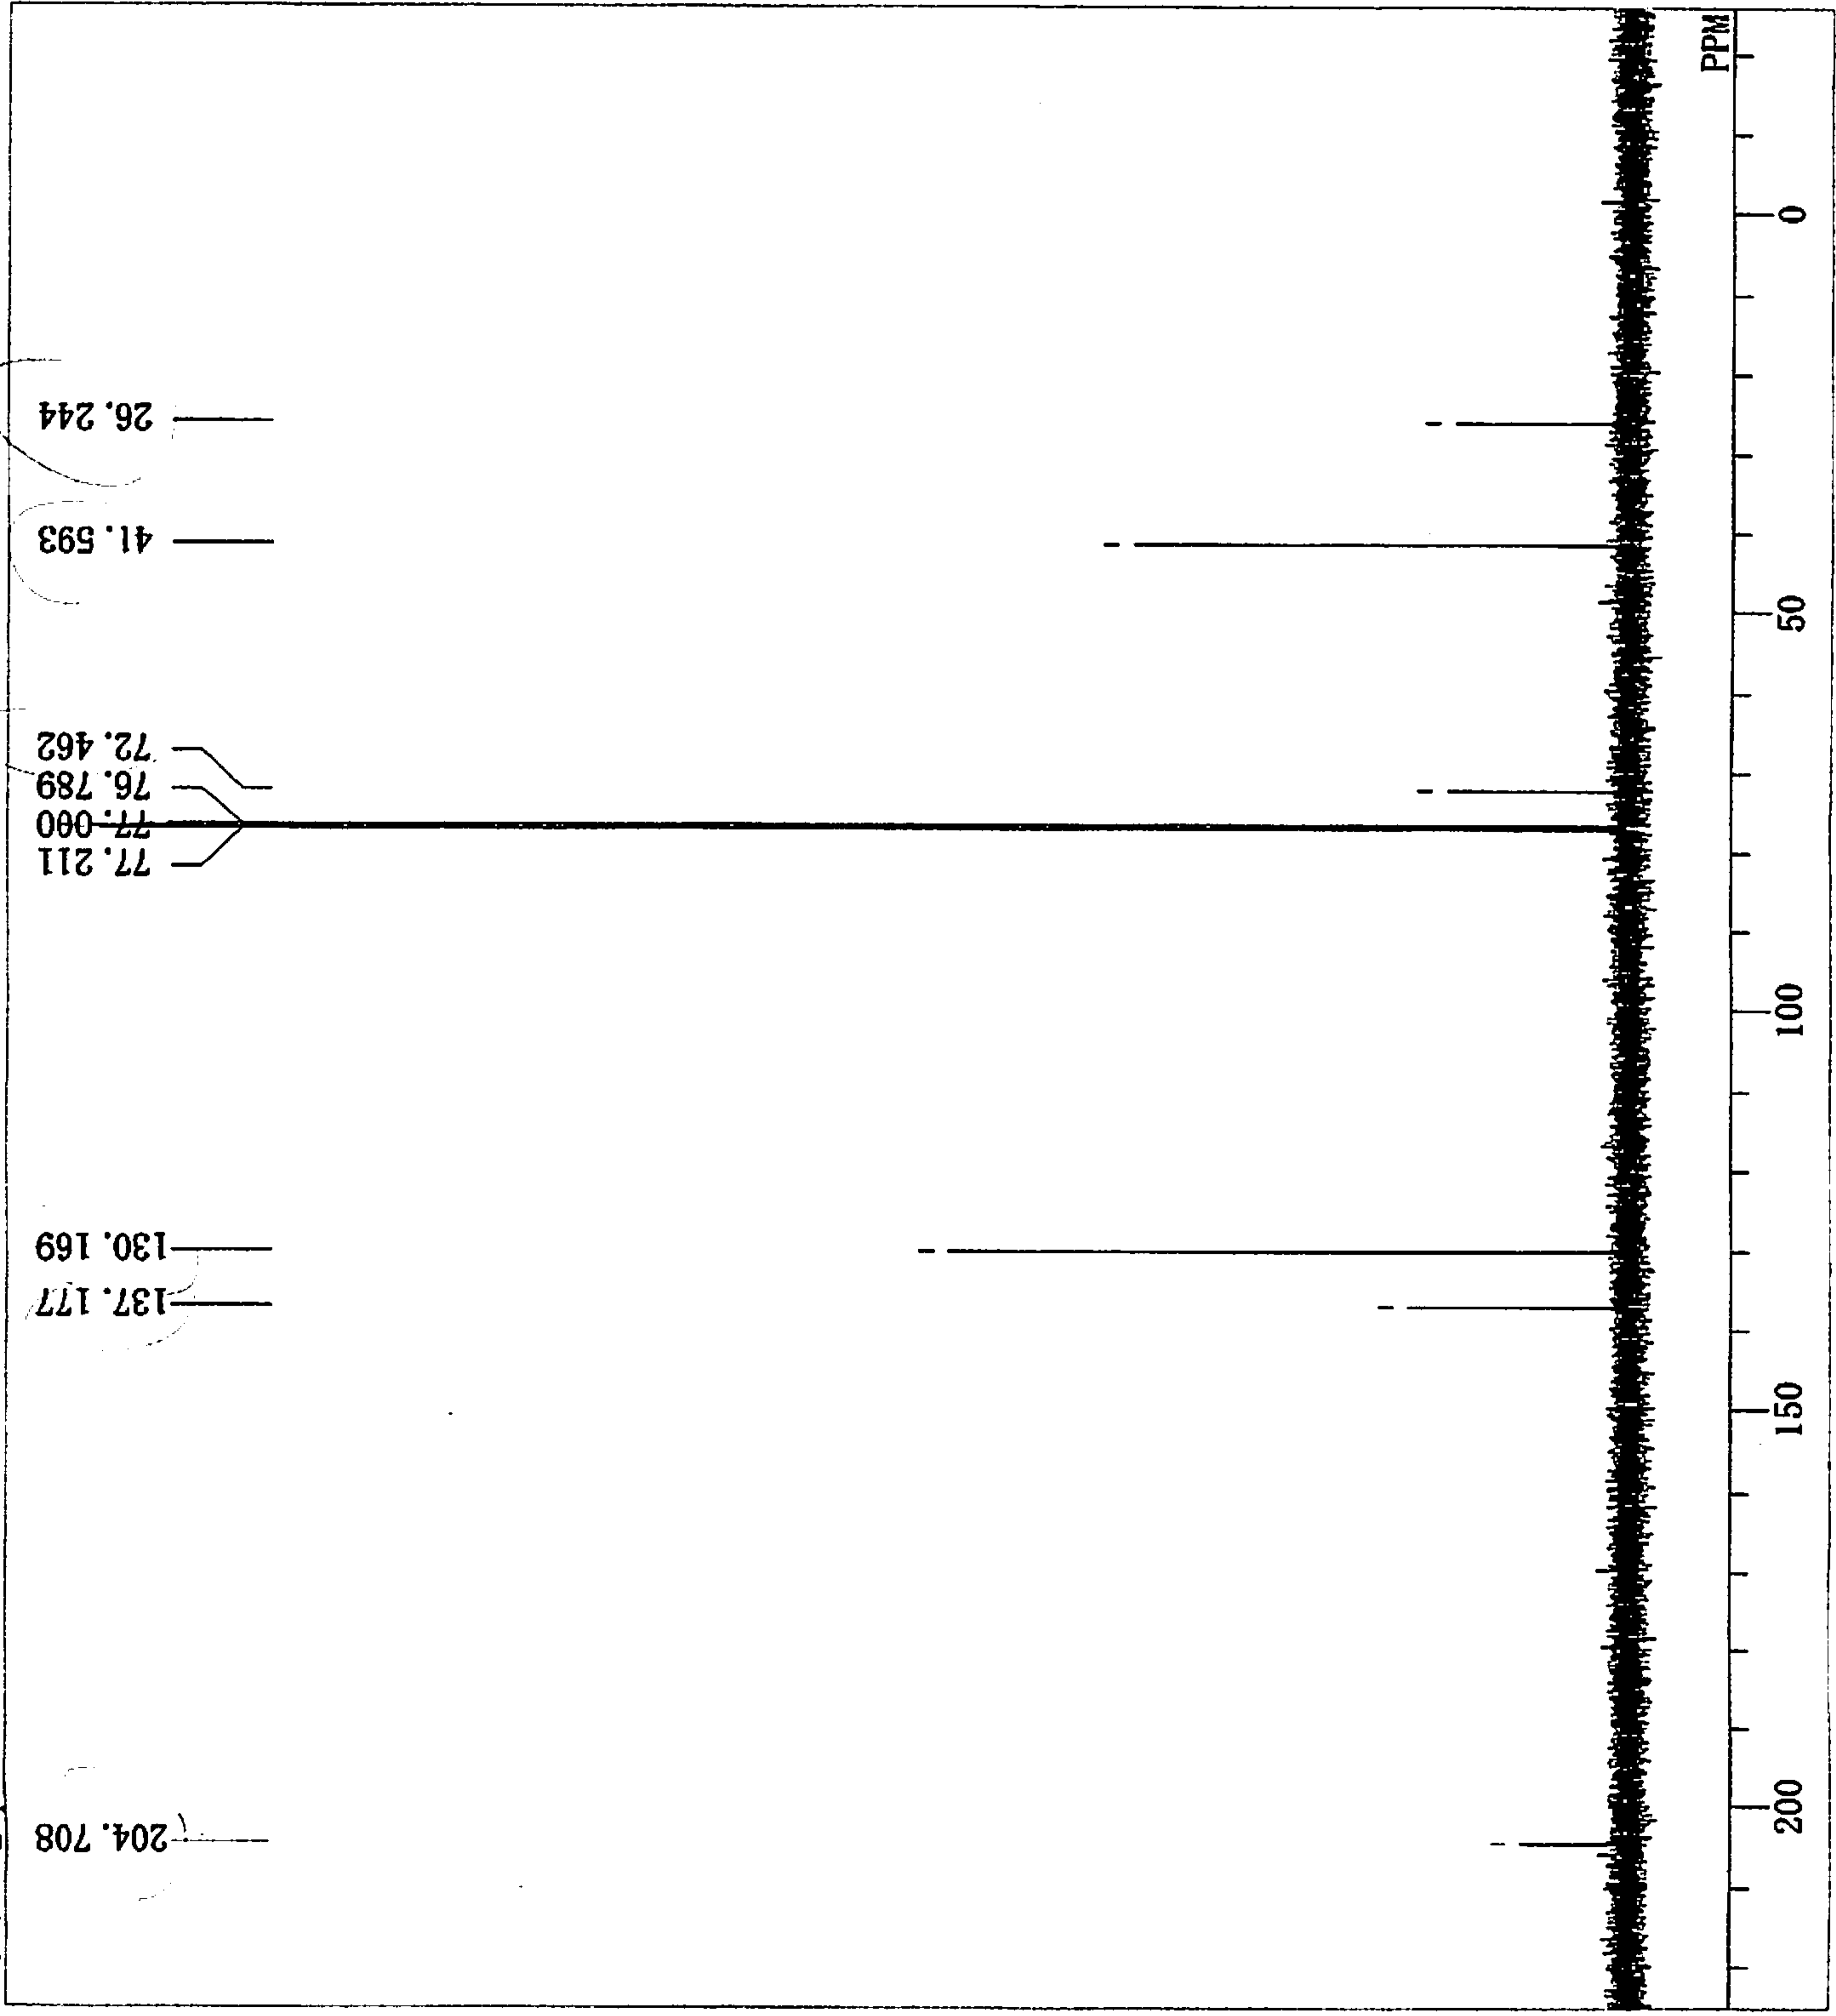

DFILE E:\Ito-479-2-pure-C. 1  
COMNT Ito-479-2-pure-C  
DATIM 15-05-2008 15:02:19  
OBNUC 13C  
EXMOD single\_pulse\_dec  
OBFRQ 150.92 MHz  
OBSET 8.52 KHz  
OBFIN 1.74 Hz  
POINT 32768  
FREQU 47348.49 Hz  
SCANS 253  
ACQTM 0.6921 sec  
PD 2.0000 sec  
PWI 4.00 usec  
IRNUC 1H  
CTEMP 24.3 c  
SLVNT CDCL3  
EXREF 77.00 ppm  
BF 0.12 Hz  
RGAIN 50

# Compound 2d

# Compound 2e

E:\COT final\COT-NTs\Ag-COT-NTs.1  
Ag-COT-NTs

DFILE  
COMNT  
DATIM  
OBNUC  
EXMOD  
OBFREQ  
OBSETE  
OBFIN  
POINT  
FREQU  
SCANS  
ACQTM  
PD  
PW1  
IRNUC  
CTEMP  
SLVNT  
EXREF  
BF  
RGAIN

E:\COT final\COT-NTs\Ag-C  
Ag-COT-NTs  
13-03-2008 13:54:18  
1H  
single\_pulse.ex2  
600.17 MHz  
5.30 KHZ  
5.47 Hz  
16384  
11261.26 Hz  
16  
1.4549 sec  
5.0000 sec  
6.10 usec  
1H  
23.5 C  
0.00 ppm  
0.12 Hz  
50

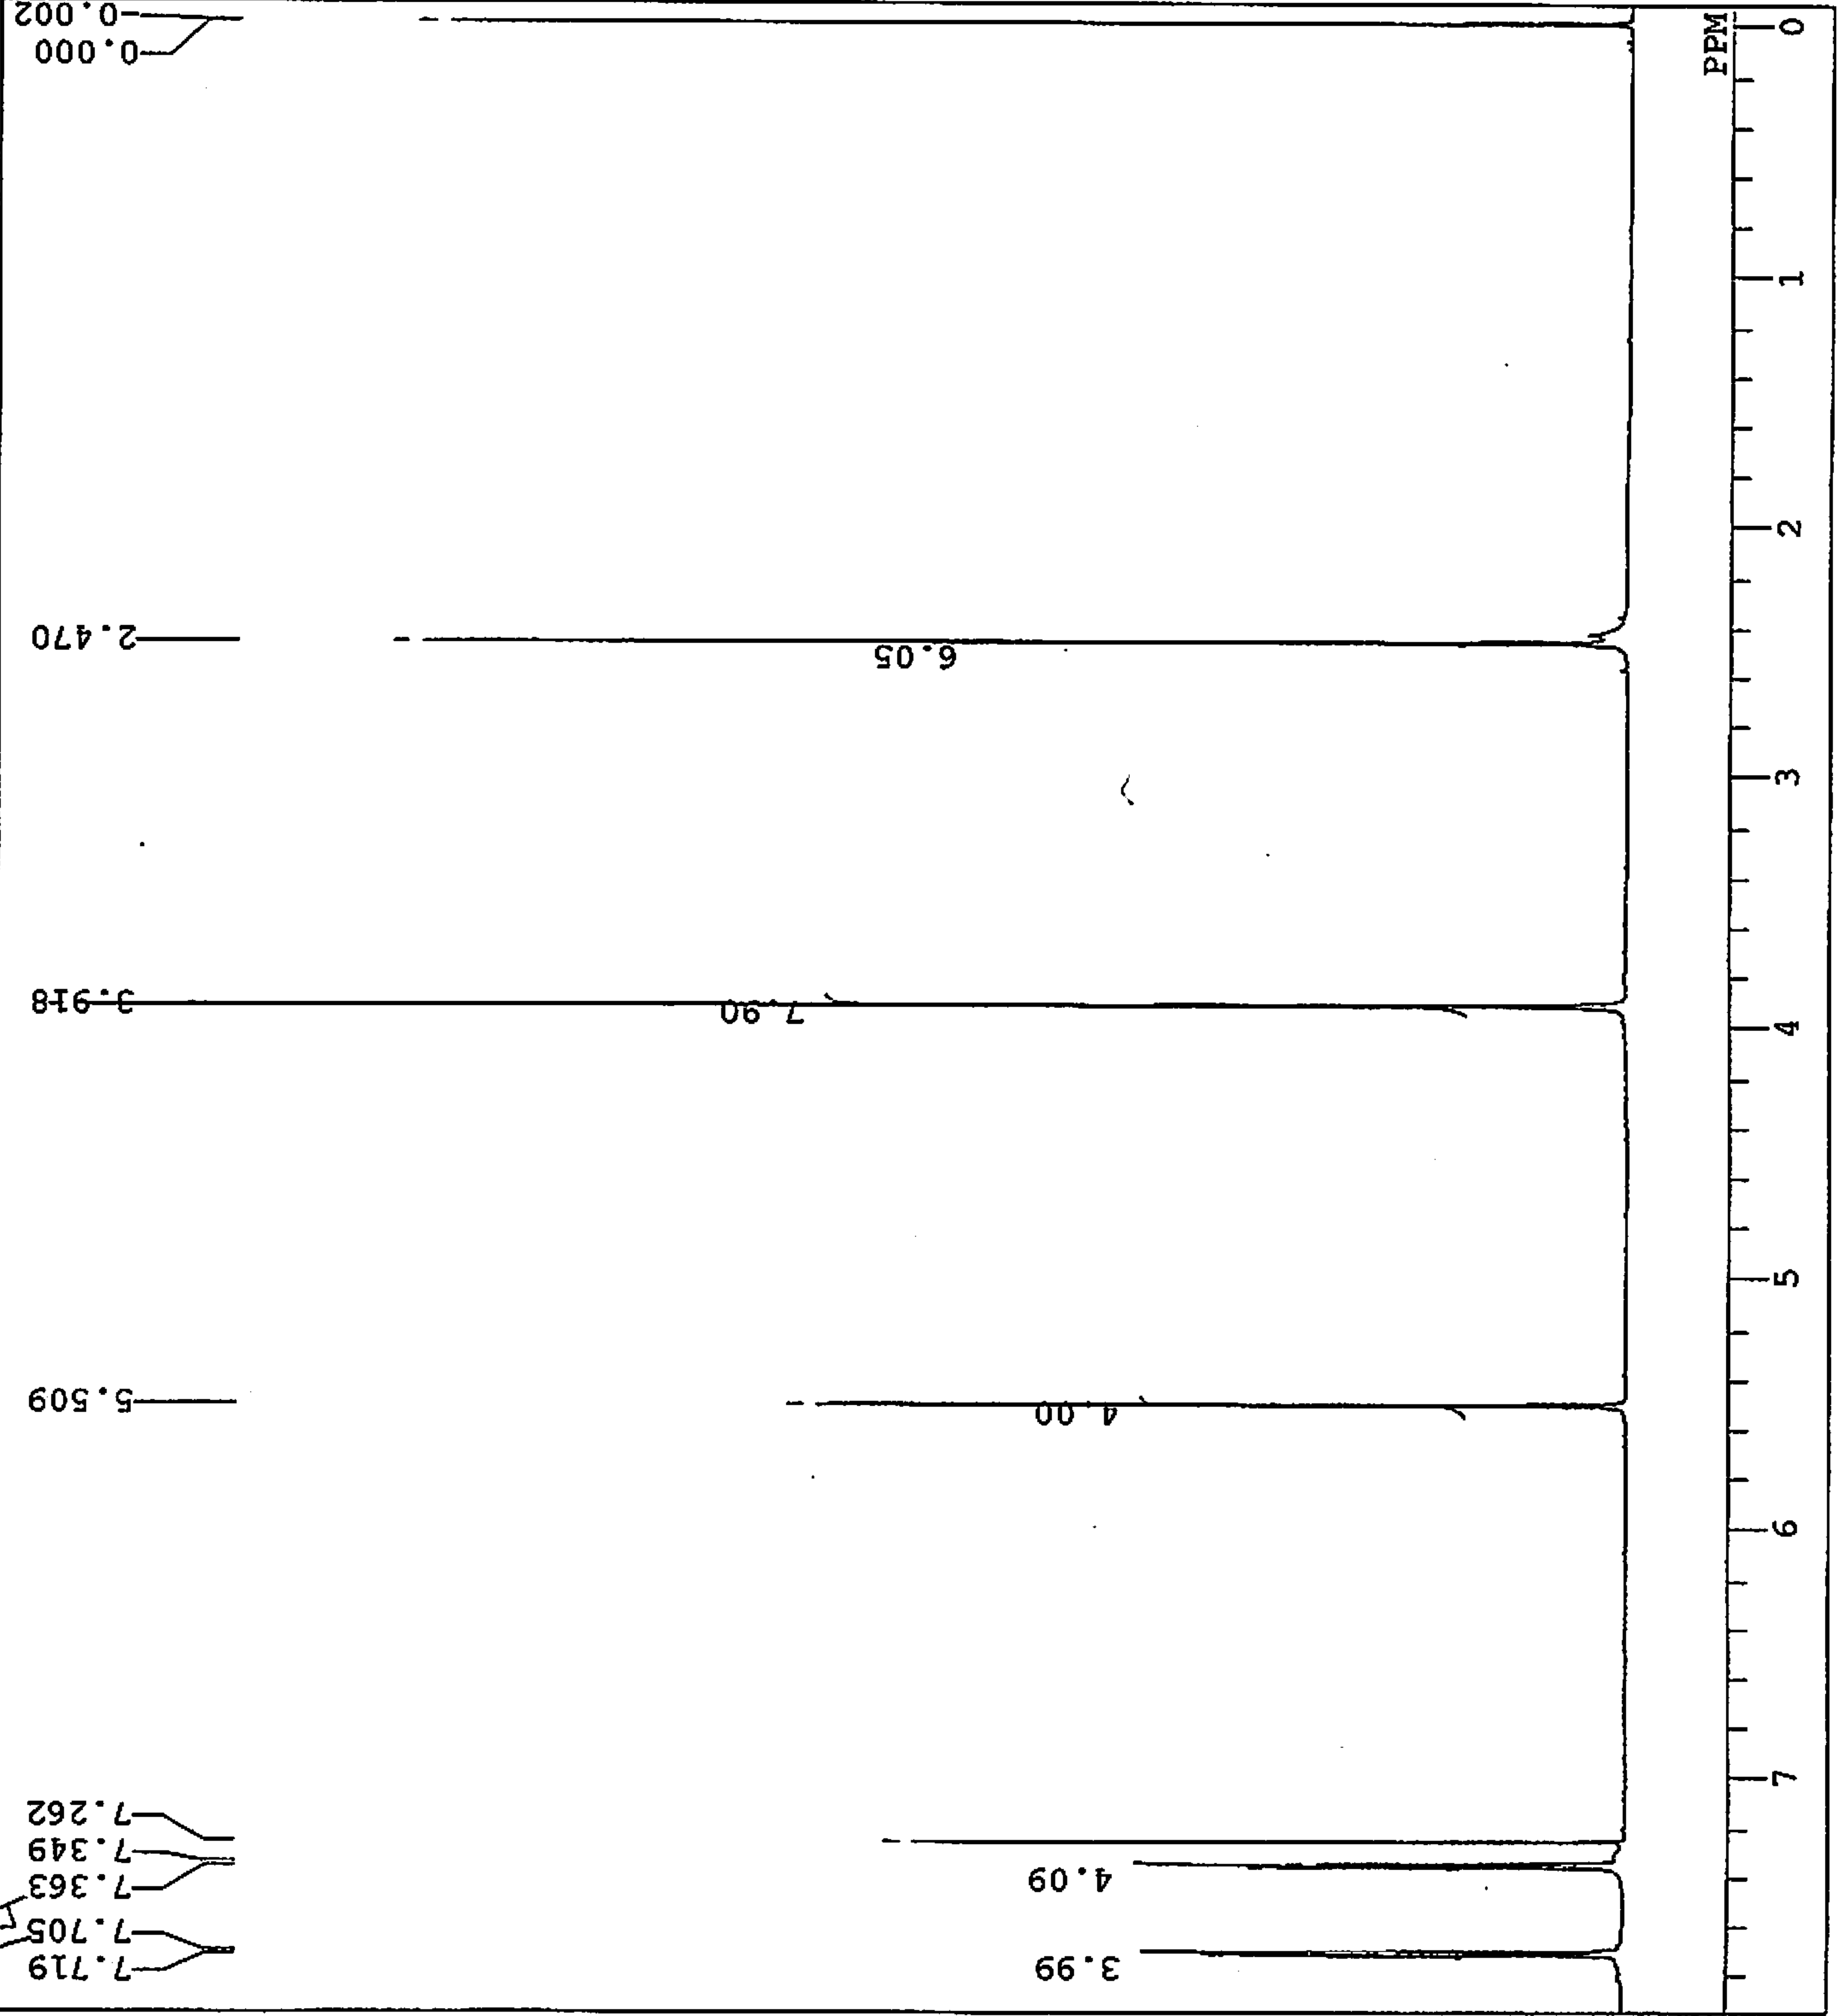

C:\DOCUME~1\NMR\LOCALS~1\Temp\~FTP6CF7.1  
Ag-COT-pure-NTs-carbon

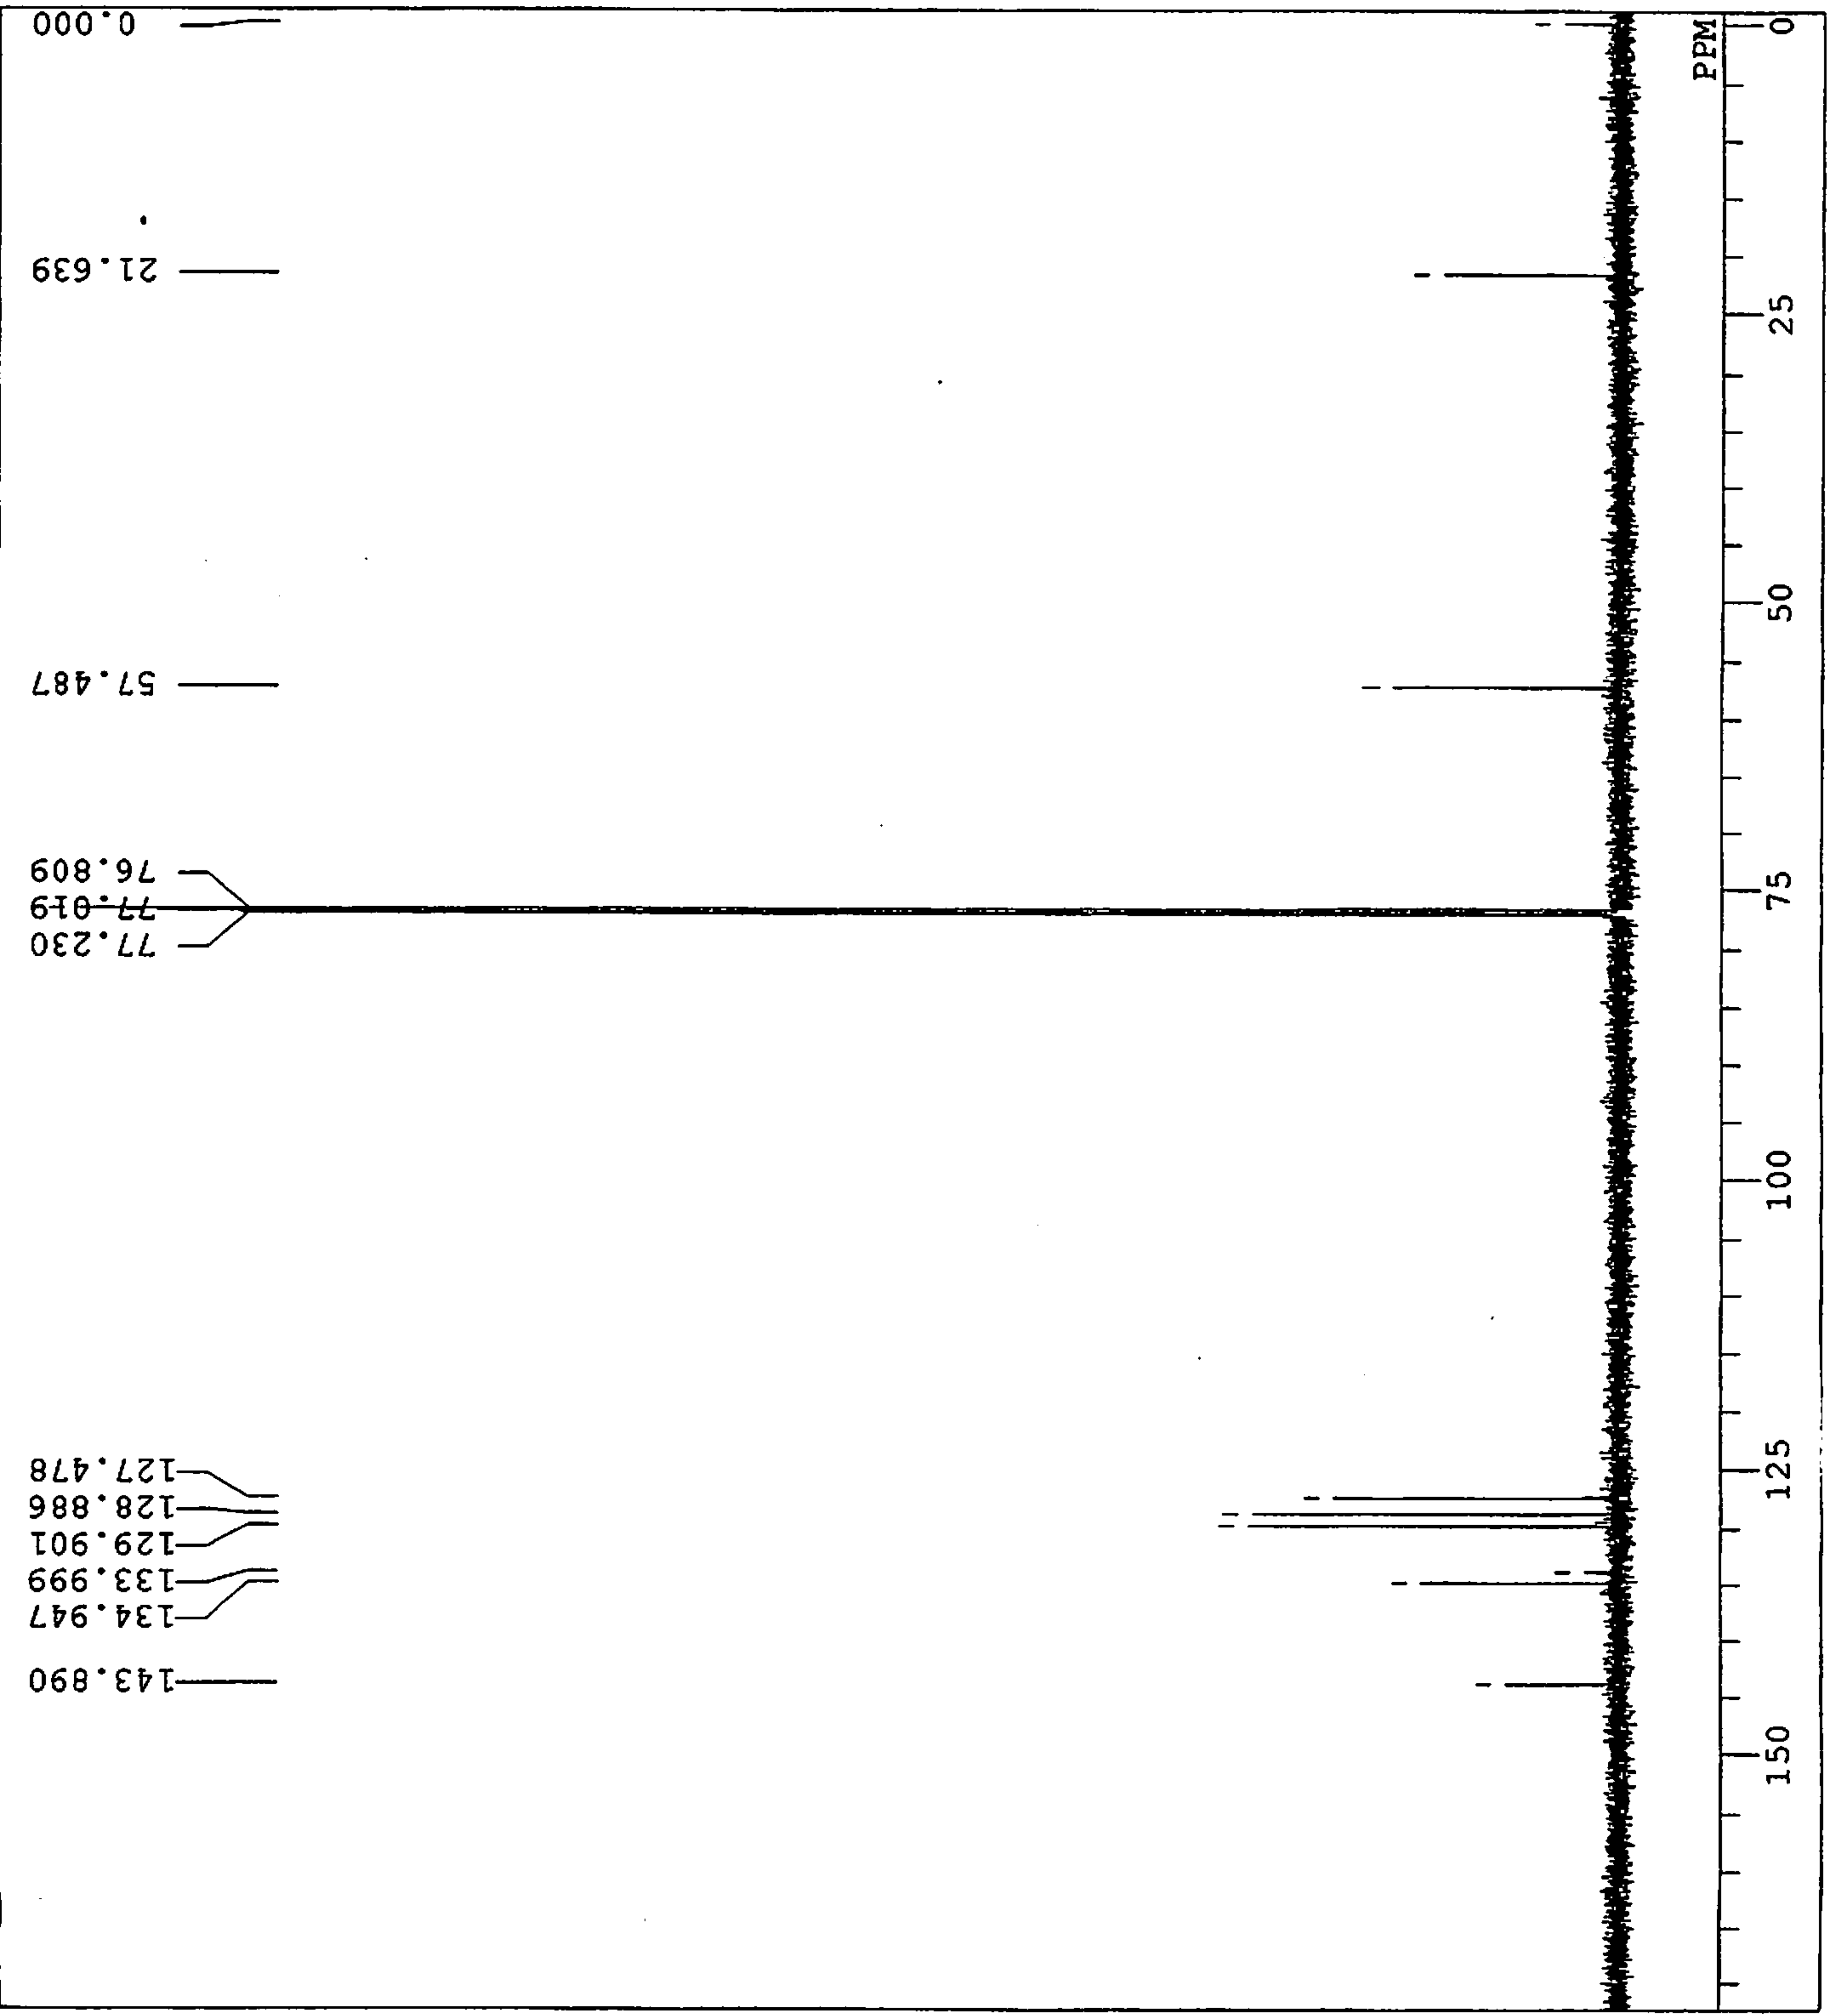

DFILE  
COMNT  
DATIM  
OBNUC  
EXMOD  
OBFRQ  
OBSET  
OBFIN  
POINT  
FREQU  
SCANS  
ACQTM  
PD  
PW1  
IRNUC  
CTEMP  
SIVNT  
EXREF  
BF  
RGAIN

C:\DOCUME~1\NMR\LOCALS~1\  
Ag-COT-pure-NTs-carbon  
13-03-2008 14:18:57  
13C  
single\_pulse\_dec  
150.92\_MHz  
8.52\_KHz  
1.74\_Hz  
32768  
47348.49\_Hz  
500  
0.6921\_sec  
2.0000\_sec  
3.67\_usec  
1H  
24.1\_C  
0.00\_ppm  
0.12\_Hz  
60

# Compound 2e

# Compound 2f

Supplementary Material (ESI) for Chemical Communications  
This journal is (c) The Royal Society of Chemistry 2009

F:\490'a\Ito-492-1-pure-COT.als  
Ito-492-1-pure-COT

```

DFILE      F:\490'a\Ito-492-1-pur
COMNT      Ito-492-1-pure-COT
DATIM      17-05-2008 20:49:52
OBNUC      1H
EXMOD      single_pulse.ex2
OBFREQ     600.17 MHz
OBSET      5.30 KHZ
OBFIN      5.47 Hz
POINT      13107
FREQU      9008.87 Hz
SCANS      8
ACQTM      1.4549 sec
PD          5.0000 sec
PW1        6.00 usec
IRNUC      1H
CTEMP      23.5 c
SLVNT      CDCL3
EXREF      0.00 ppm
BF         0.12 Hz
RGAIN      30
  
```

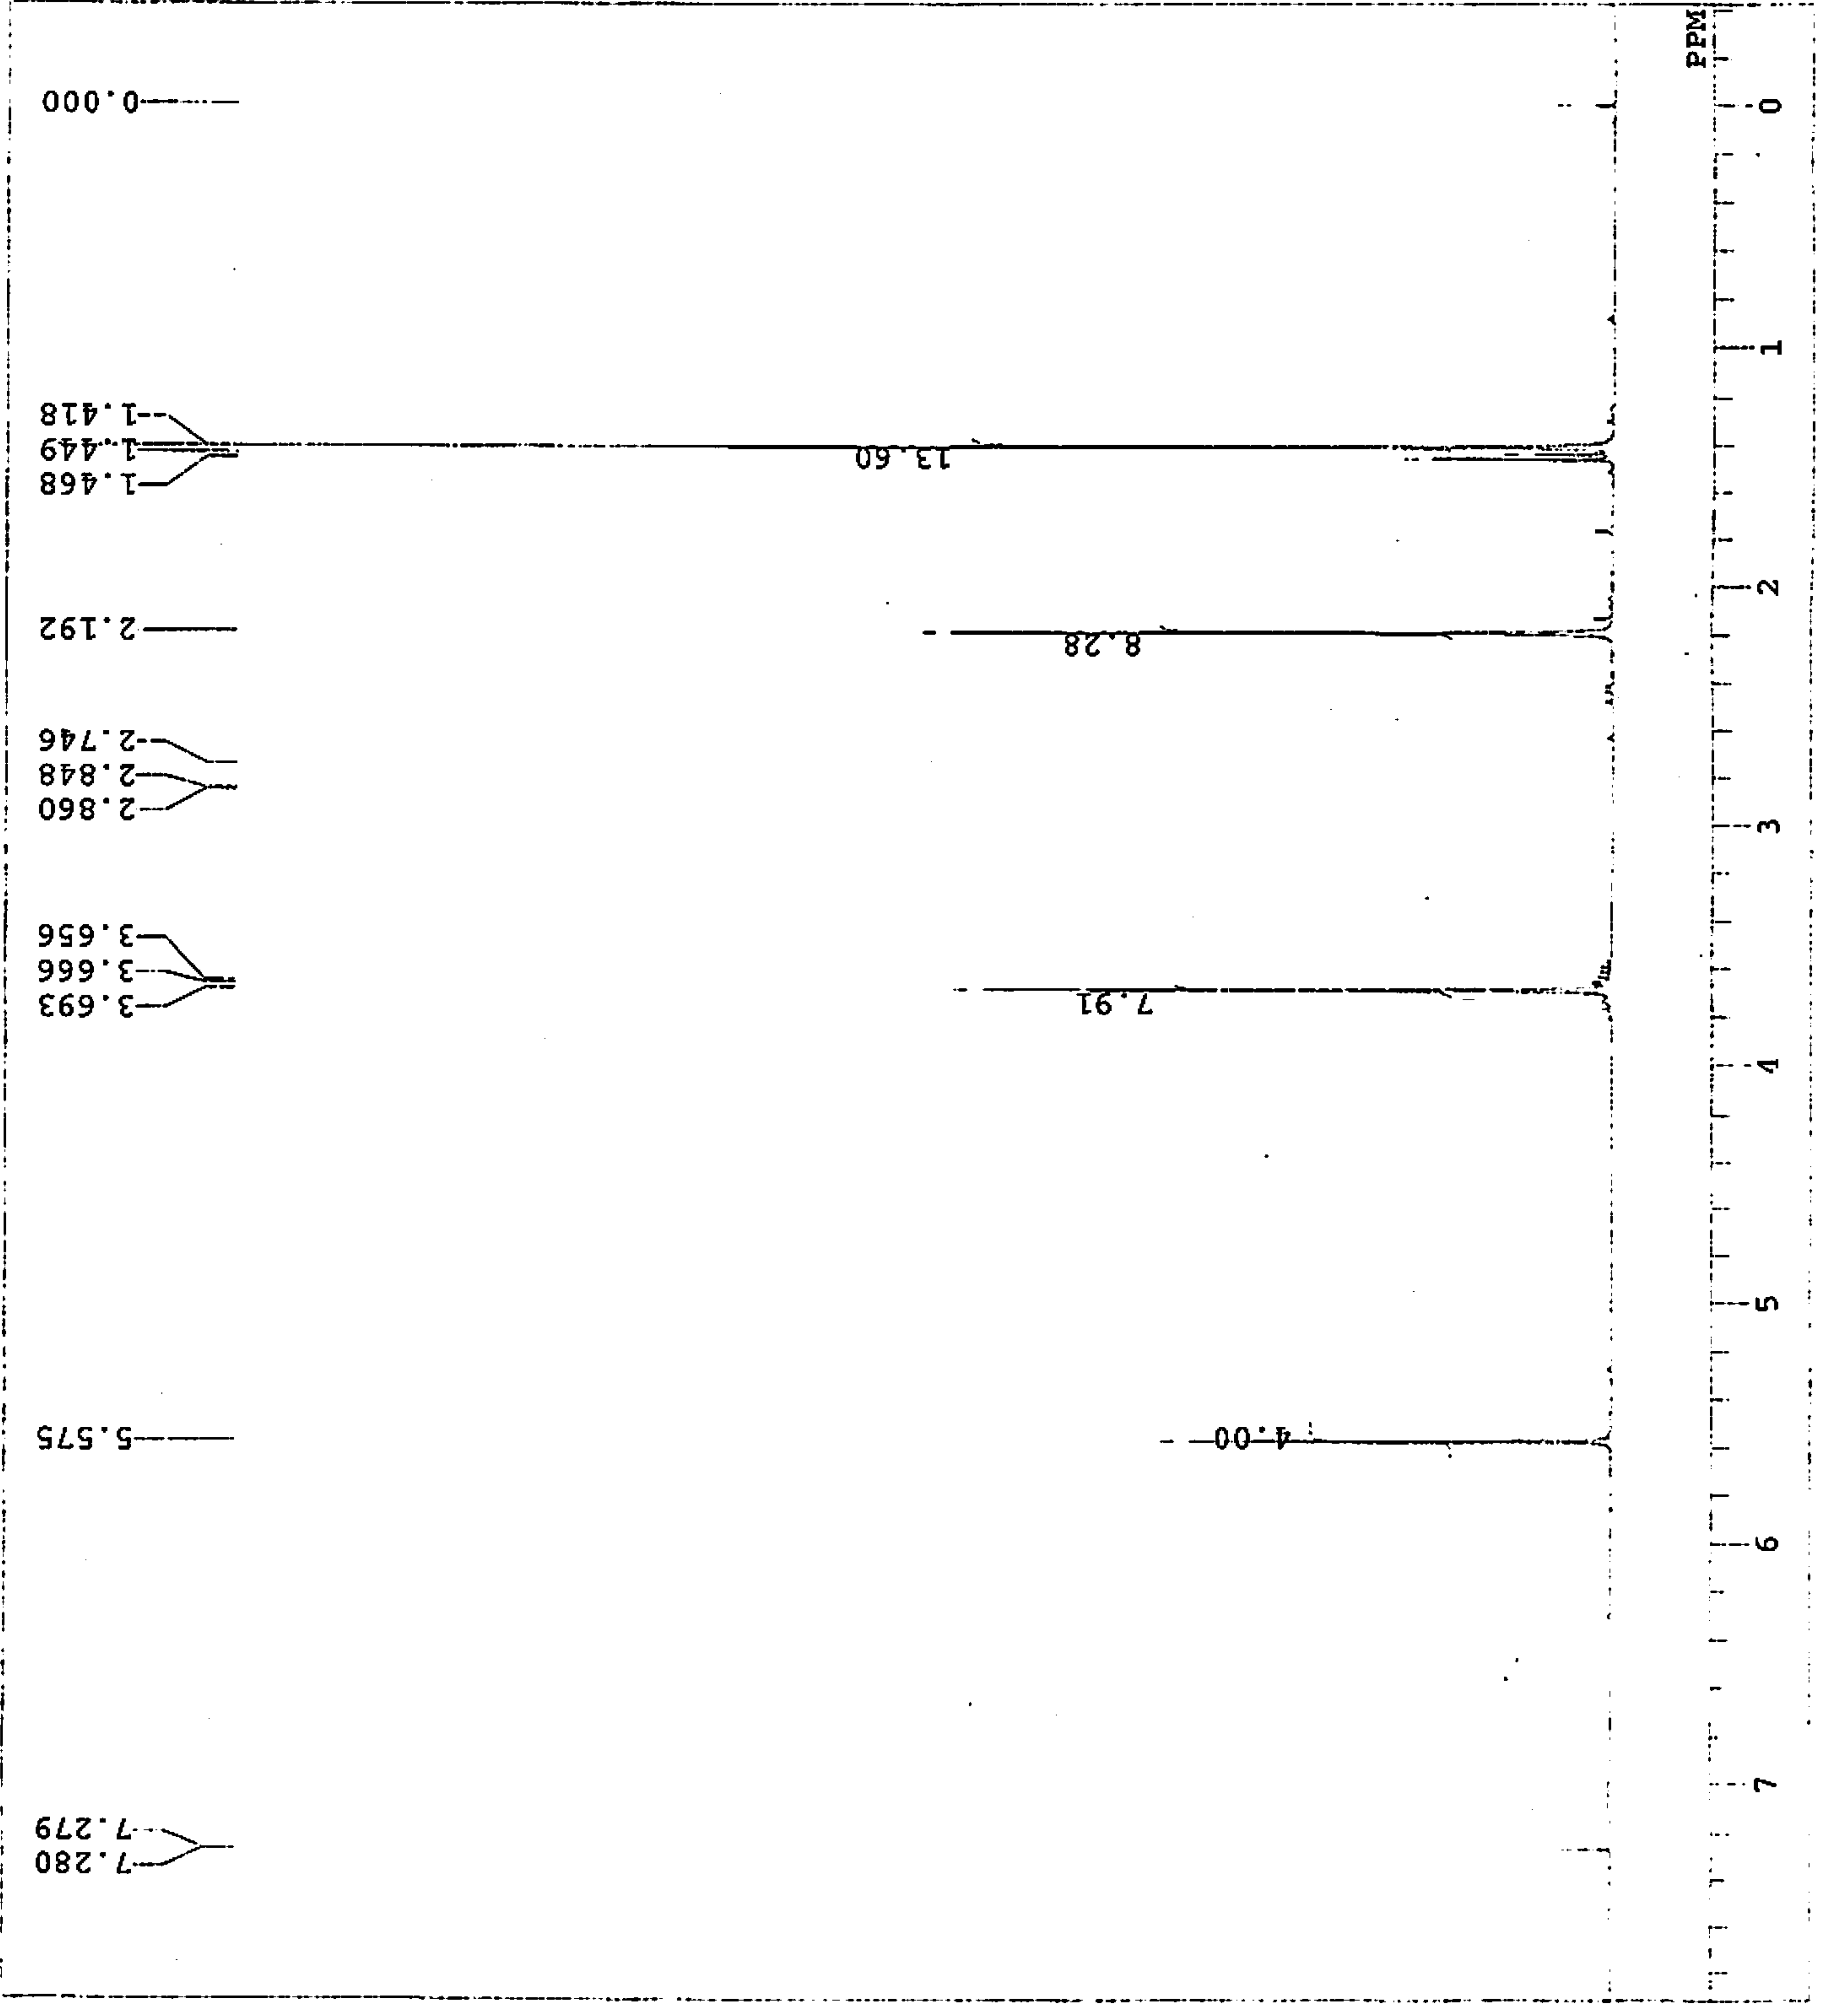



# Compound 2f

F:\490'a\Ito-492-1-pure-COT-C.1  
Ito-492-1-pure-COT-C

DFILE F:\490'a\Ito-492-1-pur-  
COMNT Ito-492-1-pure-COT-C  
DATIM 17-05-2008 20:17:56  
OBNUC 13C  
EXMOD single\_pulse\_dec  
OBFRQ 150.92 MHz  
OBSET 8.52 KHz  
OBFIN 1.74 Hz  
POINT 32768  
FREQU 47348.49 Hz  
SCANS 54  
ACQTM 0.6921 sec  
PD 2.0000 sec  
PWL 4.00 usec  
IRNUC 1H  
CTEMP 24.2 C  
SLVNT CDCL3  
EXREF 77.00 ppm  
BF 0.12 Hz  
RGAIN 50

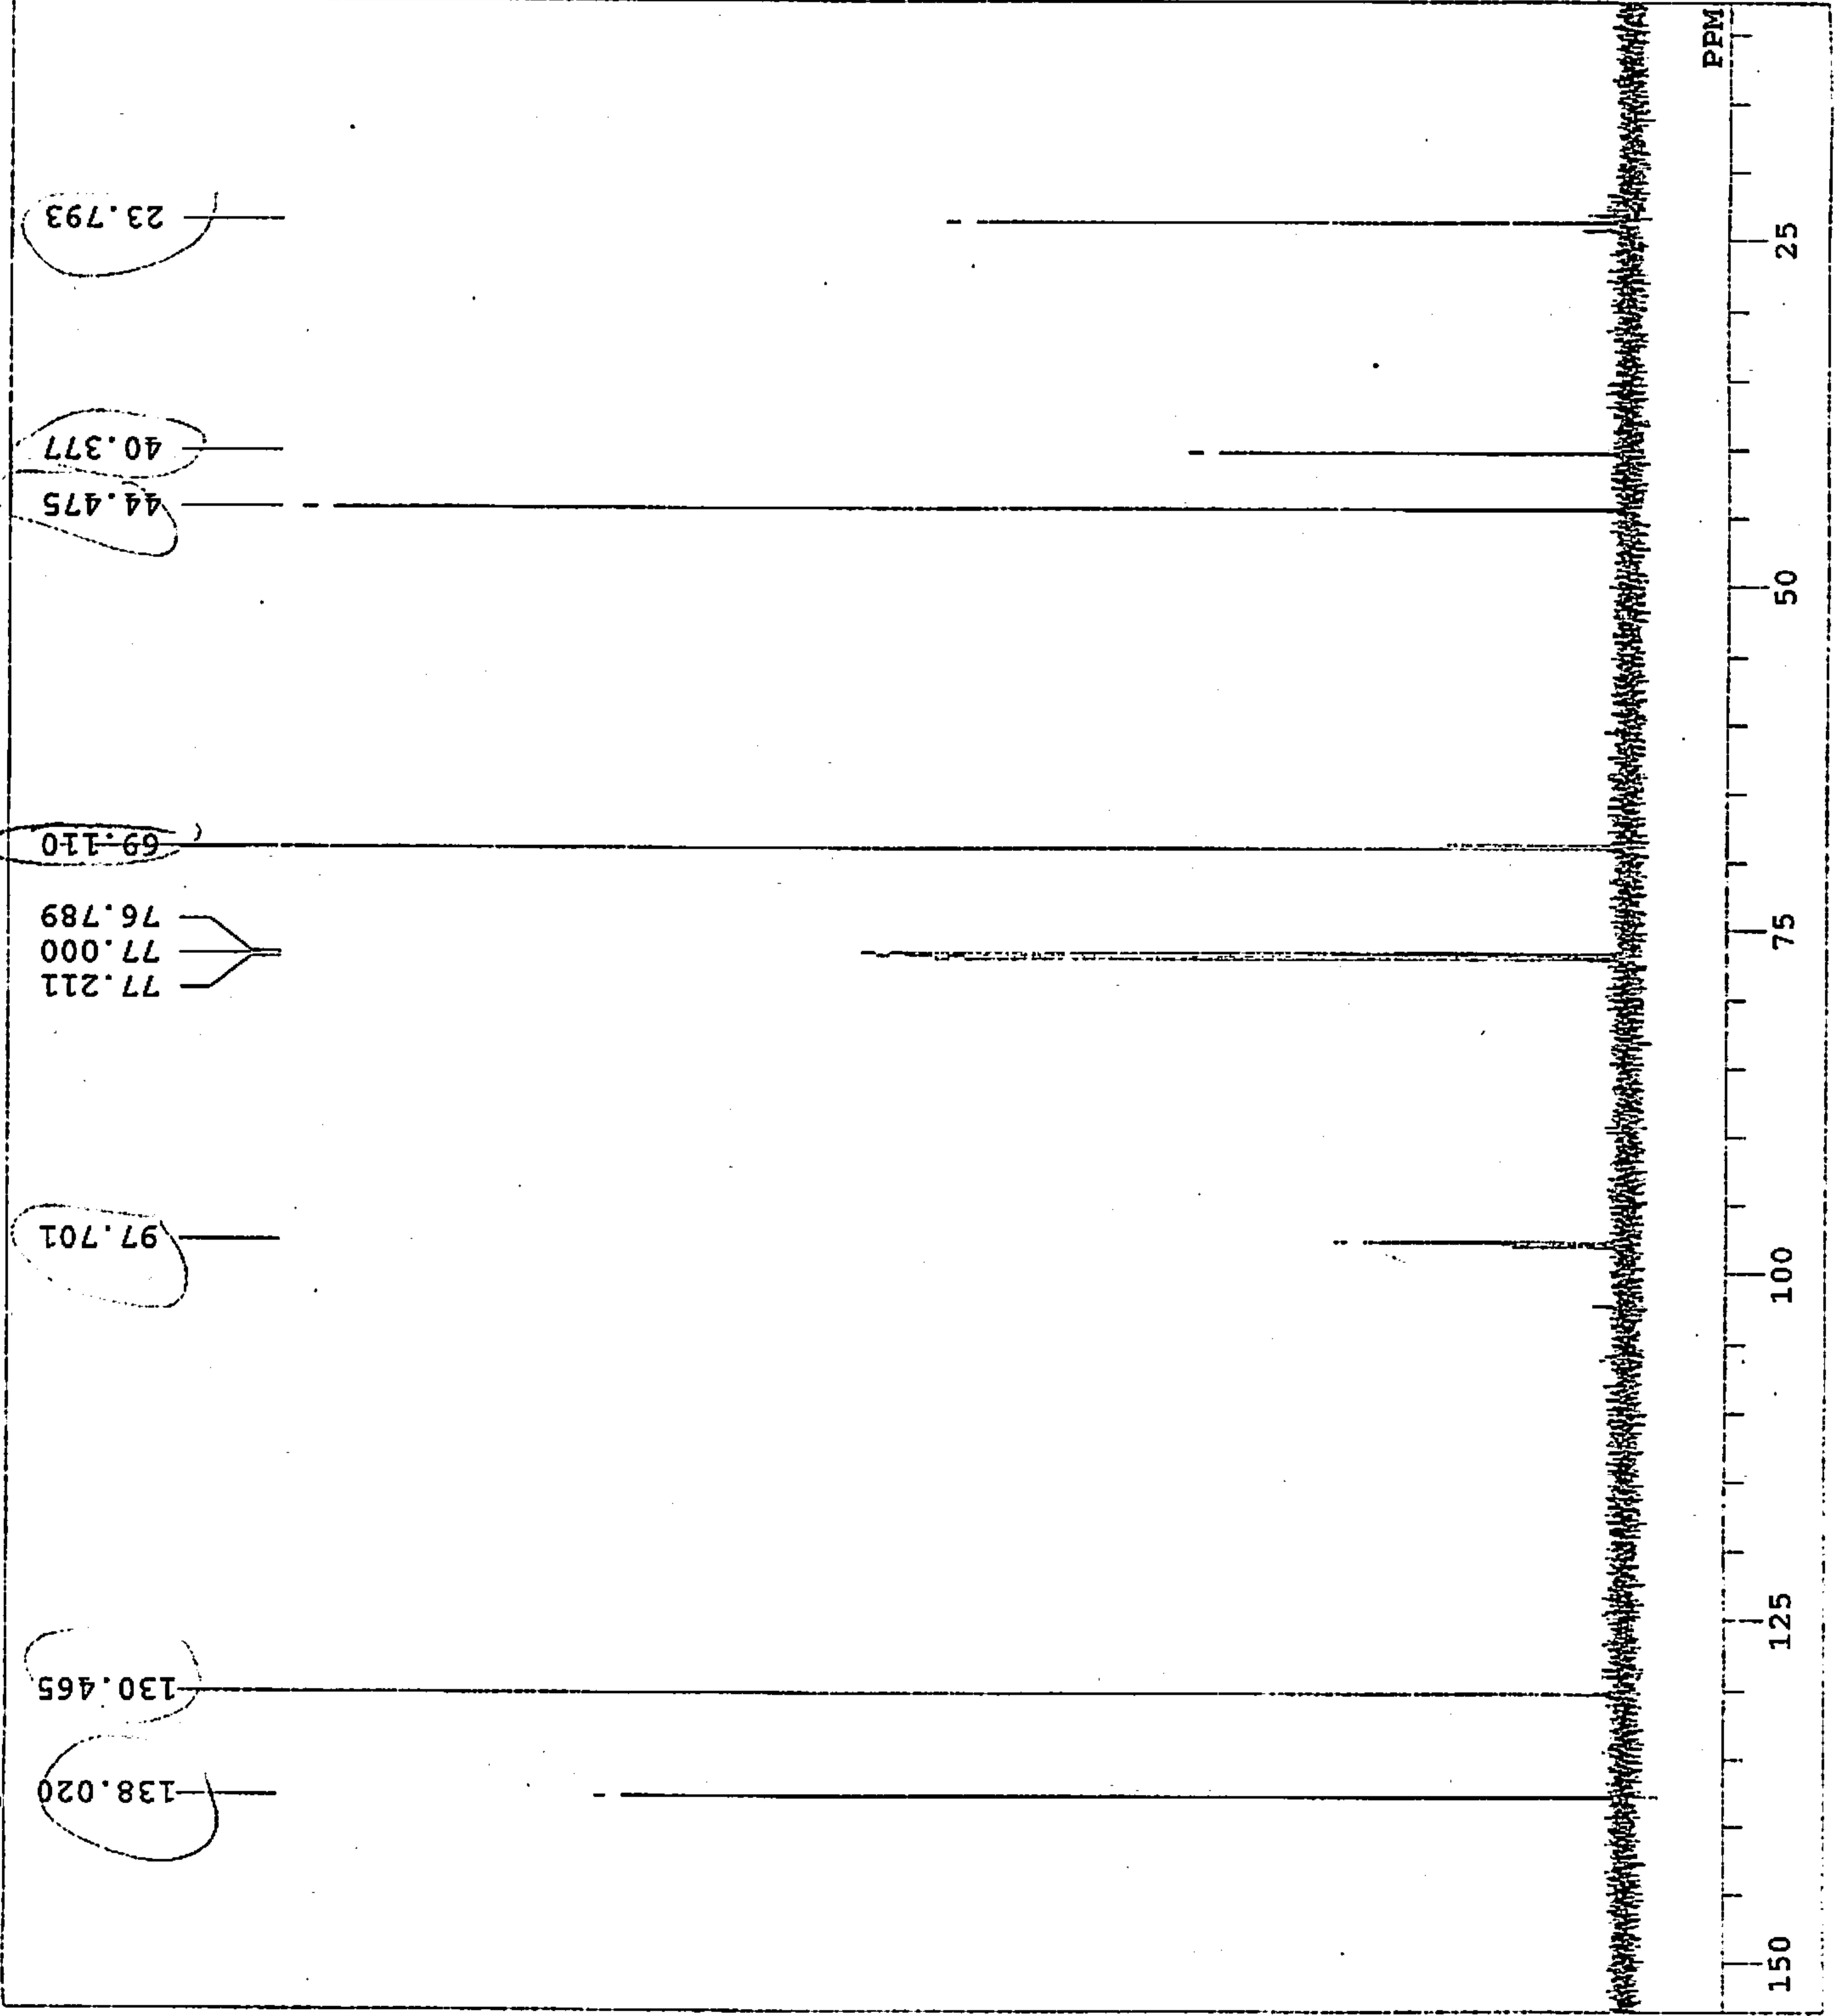

C:\DOCUME~1\NMR\LOCALS~1\Temp\~FTP68ED.1  
AG-polymerization-1st fraction-16-17

DFILE  
COMNT  
DATIM  
OBNUC  
EXMOD  
OBFREQ  
OBSETE  
OBFIN  
POINT  
FREQU  
SCANS  
ACQTM  
PD  
PW1  
IRNUC  
CTEMP  
SLVNT  
EXREF  
BF  
RGAIN

C:\DOCUME~1\NMR\LOCALS~1\  
AG-polymerization-1st fra  
09-02-2008 14:44:39  
1H  
single\_pulse.ex2  
600.17 MHz  
5.30 KHZ  
5.47 Hz  
16384  
11261.26 Hz  
16  
1.4549 sec  
5.0000 sec  
6.10 usec  
1H  
23.5 c  
CDCL3  
0.00 ppm  
0.12 Hz  
34

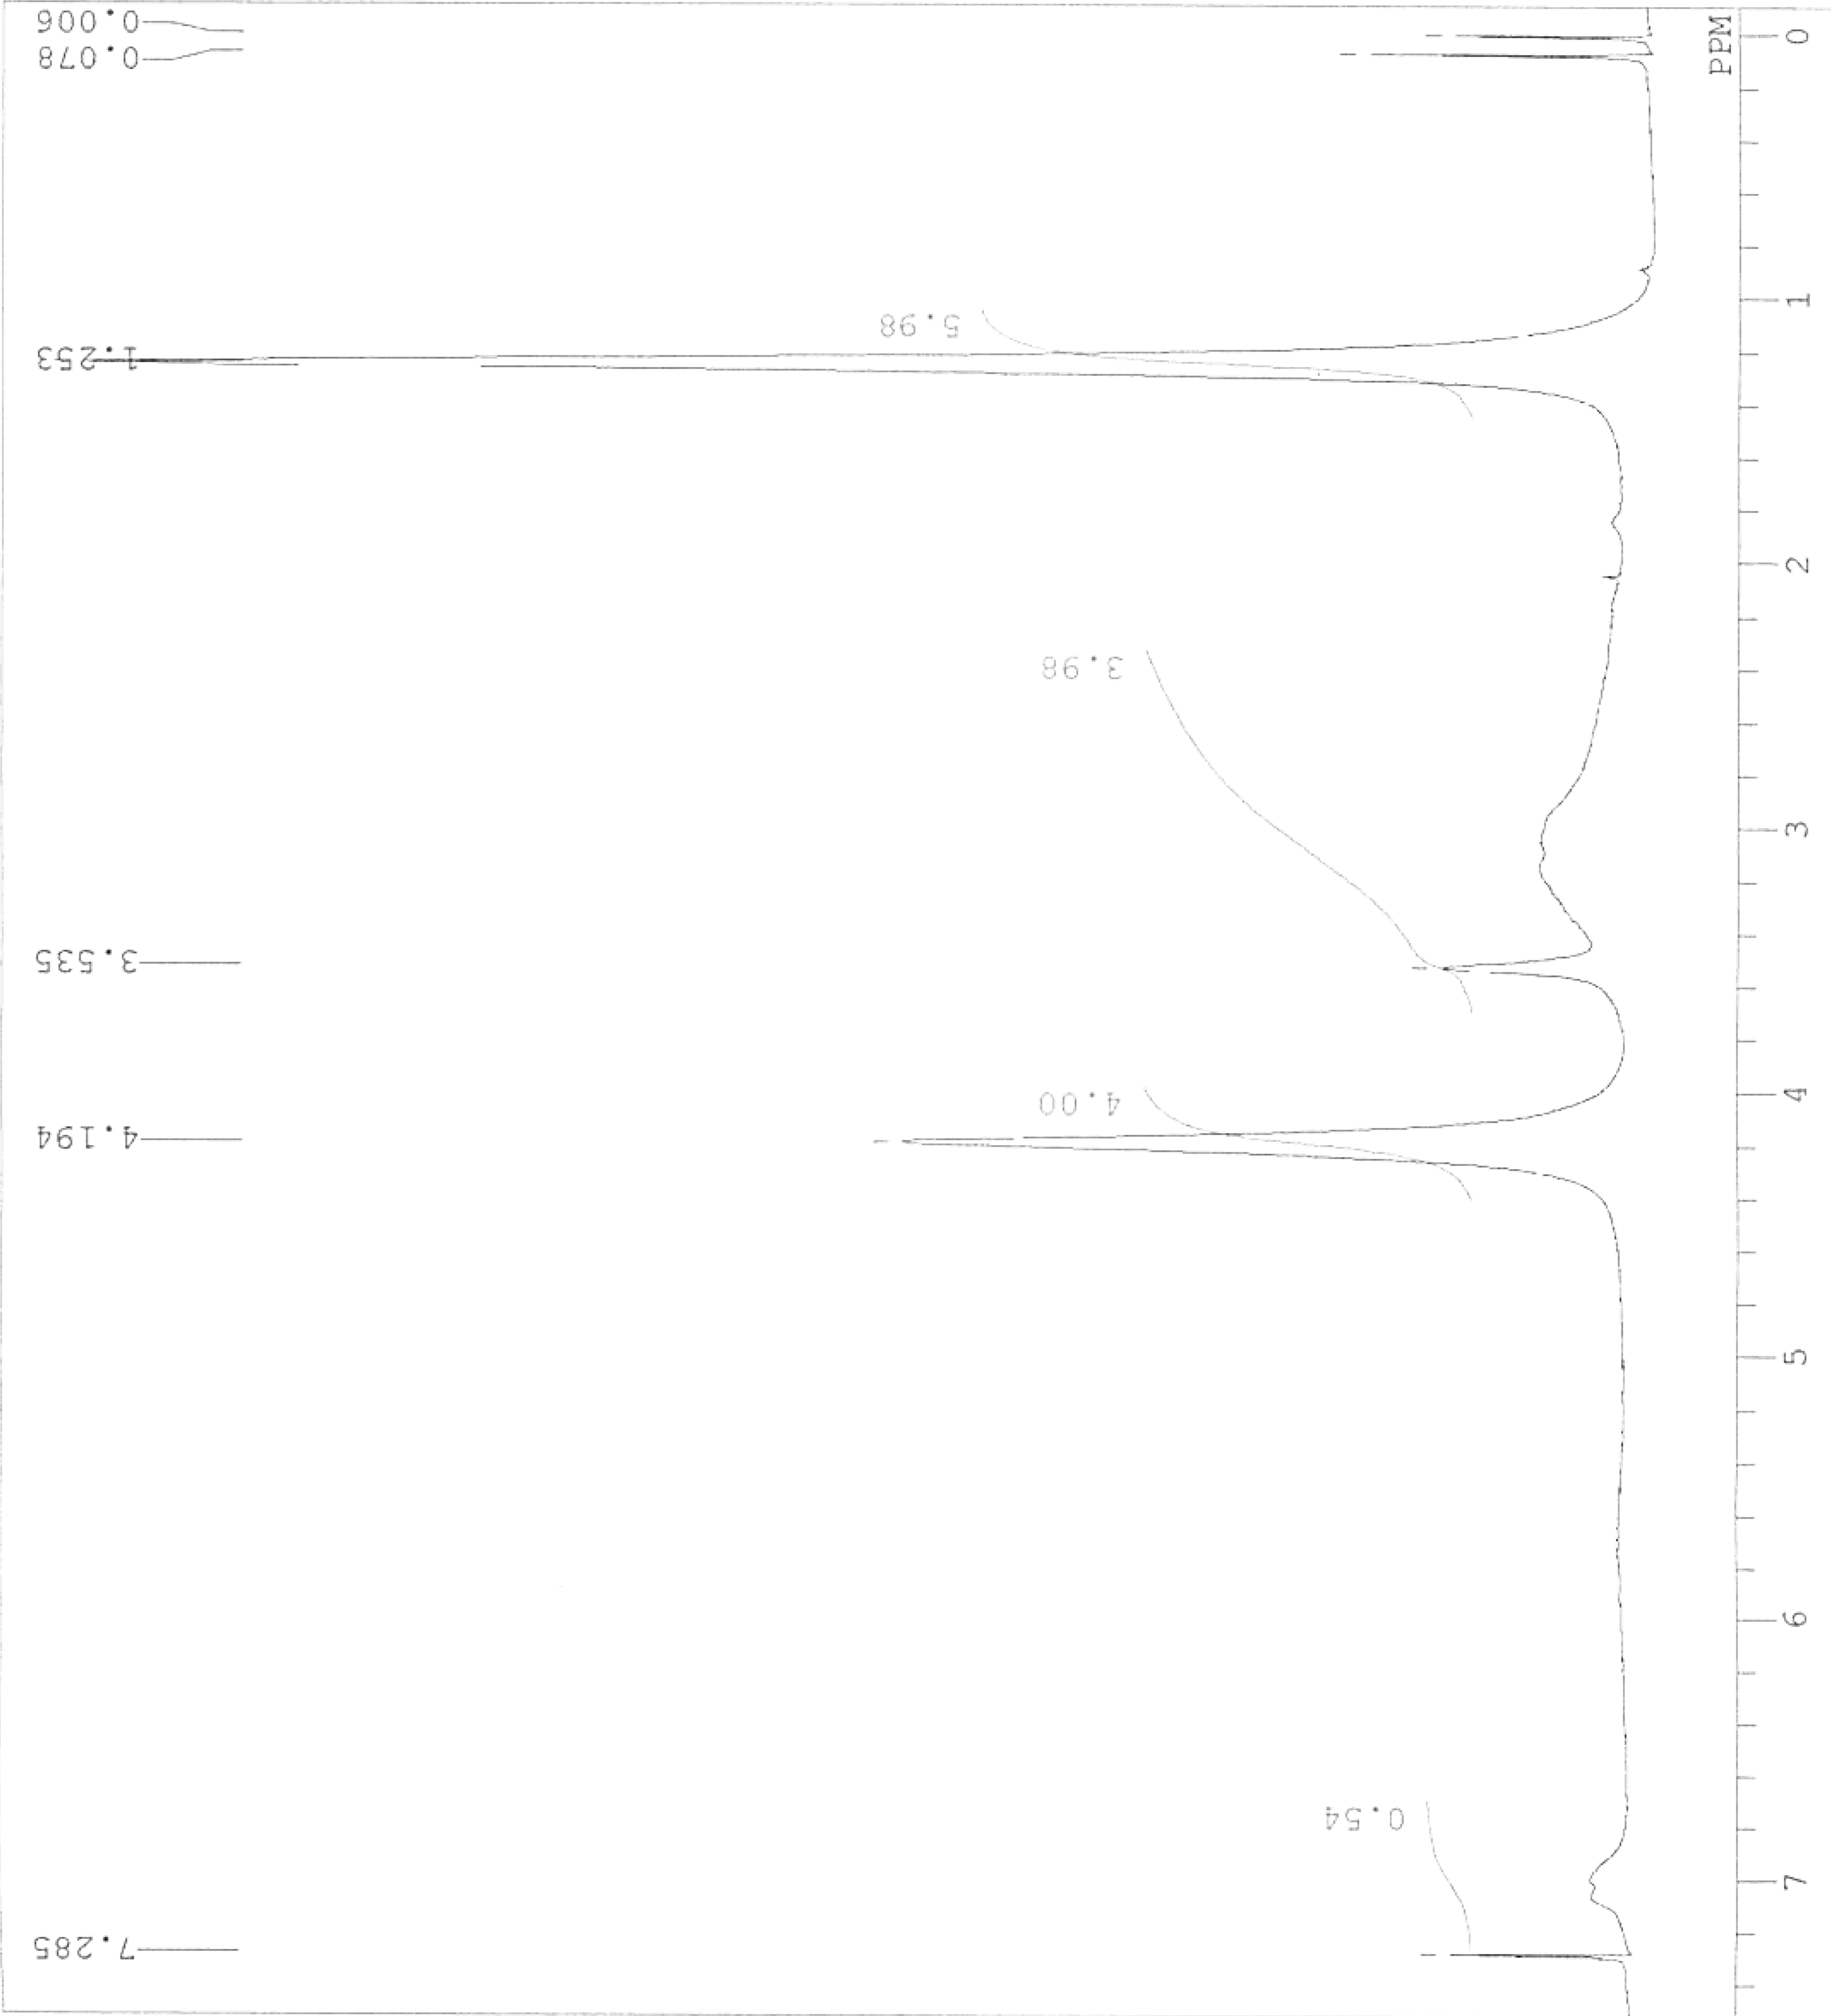

yellow fraction  
1st fraction

**Polymer  
Yellow fraction  
(less polar)**



C:\WINNMR98\COMMON\\_DEFAULT.ALS  
AG-poly-broun-solid

DFILE C:\WINNMR98\COMMON\\_DEFAULT  
COMNT AG-poly-broun-solid  
DATIM Thu Feb 14 15:11:35 2008  
OBNUC 1H  
EXMOD NON

OBFRQ 270.05 MHz  
OBSET 112.00 KHz  
OBFIN 5800.0 Hz  
POINT 32768  
FREQU 5402.4 Hz  
SCANS 8  
ACQTM 6.065 sec  
PD 0.935 sec  
PW1 5.2 us  
IRNUC 1H  
CTEMP 25.1 C  
SLVNT CDCL3  
EXREF 0.00 ppm  
BF 1.00 Hz  
RGAIN 15

*Orange fraction*  
*2nd fraction*

# Polymer Orange fraction (polar)

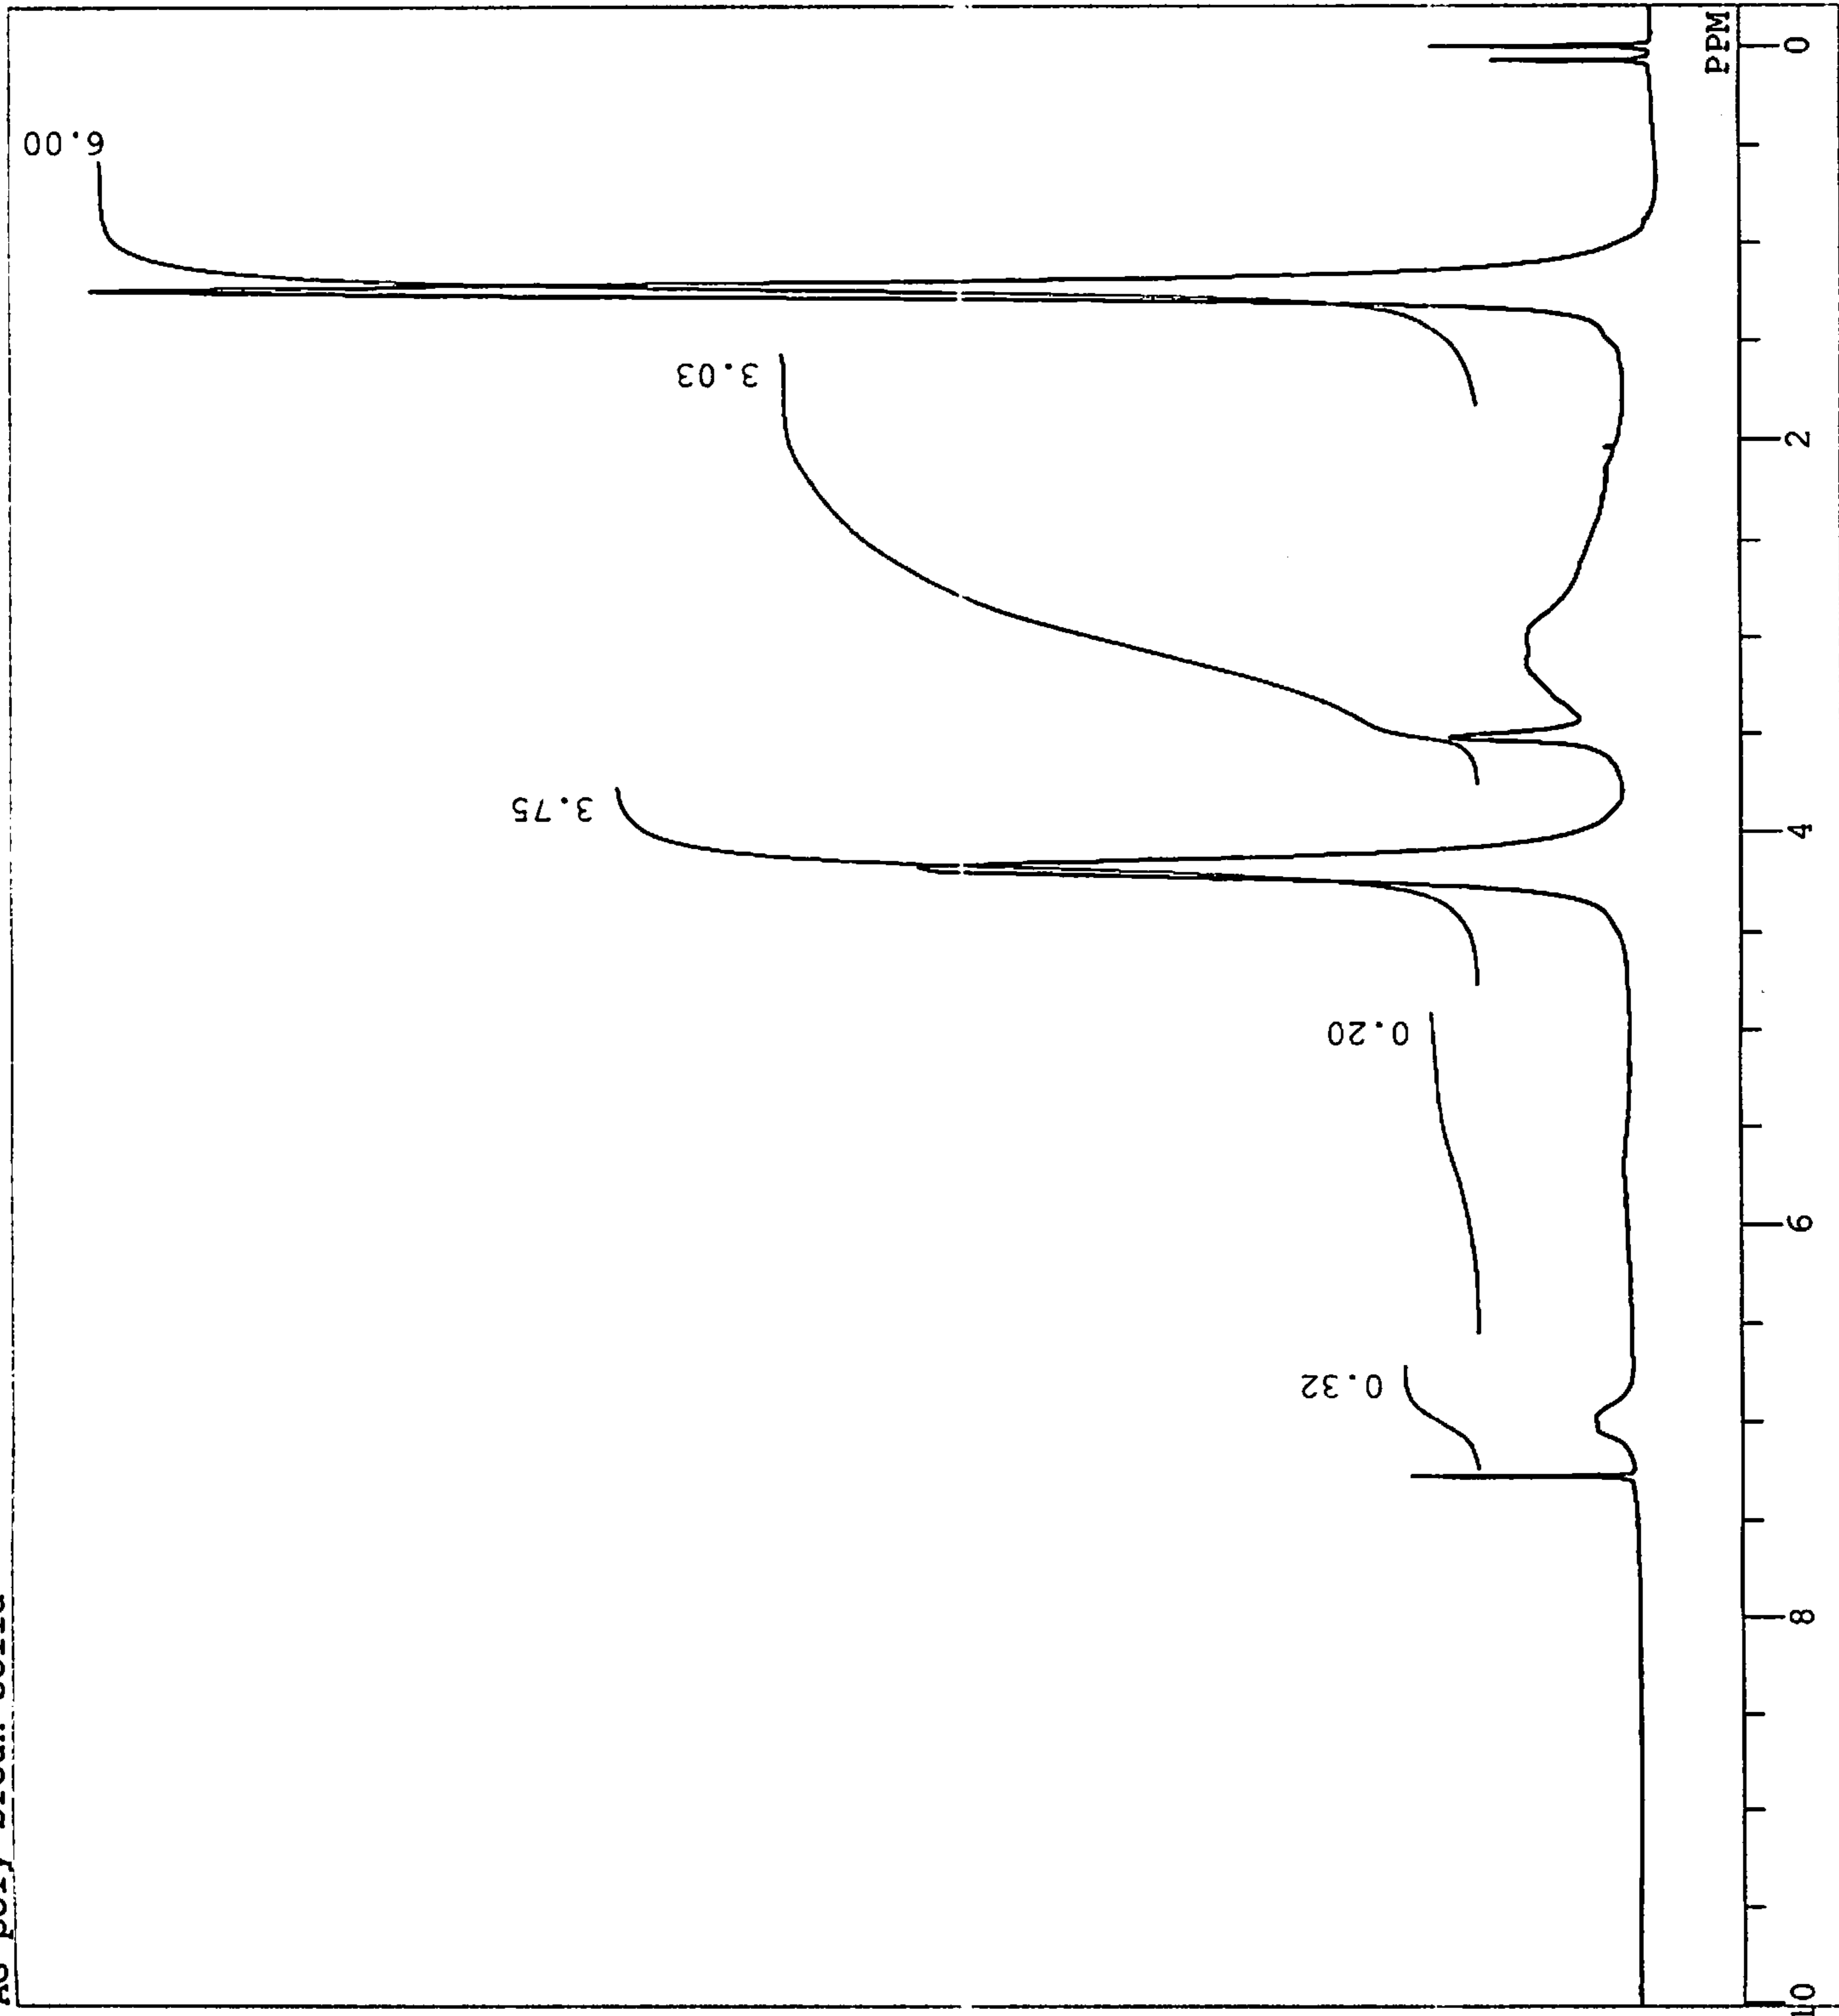

Supplement: b816850d.pdf [file b816850d.pdf]
